# Supplementary material for: MicroRNA Expression and Regulation in Human, Chimpanzee, and Macaque Brains
Source: PLoS Genet. 2011 Oct 13;7(10):e1002327. doi: 10.1371/journal.pgen.1002327 (PMC3192836; doi:10.1371/journal.pgen.1002327)
Supplement: Table S3 — This table lists miRNA expression levels in the prefrontal cortex and cerebellum of three species based on Illumina sequencing data. (XLS) [file pgen.1002327.s011.xls]

## Sheet: PFC & CB (Human & Chimp &macaqu
Table S3. miRNA expression level (read counts) in prefrontal cortex and cerebellum of three species, based on small RNA Illumina deep sequencing platform
miRNA ID	CX_Hu1c	CX_Hu2	CB_Hu1	CB_Hu2	CX_Ch1	CX_Ch2	CB_Ch1	CX_Ma1	CX_Ma2	CB_Ma1
hsa-let-7f	1109744	536619	1258152	1239128	1134988	903247	1218674	1295347	1149285	1474644
hsa-let-7g	488020	197396	634254	656952	552919	397753	650093	574554	491057	852547
hsa-let-7a	258328	127797	529364	502685	309572	246407	449506	323791	285545	577157
hsa-let-7c	251434	116963	188907	189332	259457	206023	157160	295154	277880	166398
hsa-let-7b	107452	51087	247956	231121	126911	107430	207653	104058	107793	255216
hsa-mir-29a	106420	68050	43176	44237	NA a	NA	NA	149861	147938	47072
hsa-mir-219-2-3p	74322	16736	6145	10606	39474	26098	8374	15870	10202	9075
hsa-mir-103	61813	38947	92232	96630	86561	78021	86875	77466	70549	100109
hsa-mir-128	59487	45527	48586	42951	66988	64891	41528	95333	106474	48291
hsa-mir-1	58731	41517	3502	3212	64004	61757	5413	102058	97325	8125
hsa-mir-7	35937	20920	3662	4364	19121	15646	4431	20022	19294	6318
hsa-mir-107	32862	20886	62127	68259	51292	46558	57026	57050	52170	71077
hsa-let-7e	29090	14456	45536	48202	34013	27591	42869	39895	35098	61805
hsa-mir-143	28302	18988	5984	5272	15183	13555	4794	18038	17827	6050
hsa-let-7i	27600	9418	74320	73553	29665	20032	75177	37271	34258	83716
hsa-mir-124	23626	15310	58461	44711	24484	21771	65122	46386	57040	42580
hsa-mir-140-3p	22481	16556	21278	21764	25161	25670	16945	15371	16839	20192
hsa-mir-181a	22259	13773	24095	22262	21325	25892	19968	22584	28248	19039
hsa-mir-340	21741	13443	11103	12505	26919	23656	9843	32784	30128	18260
hsa-mir-26a	20495	12333	36302	32112	22164	19809	45619	31867	32995	28593
hsa-let-7d	19084	11021	34782	34901	27063	24488	36784	35303	31629	43963
hsa-mir-101	17323	9684	32701	32530	19544	16399	31267	11442	9931	33219
hsa-mir-125b	12622	8501	7586	8156	14835	13256	7829	11622	12476	8414
hsa-mir-29c	12247	7294	12933	12847	11824	9714	13274	19699	19134	16935
hsa-mir-9	12085	4952	10254	11865	14222	10019	12242	26609	22841	12400
hsa-mir-26b	11300	6364	11334	10588	13173	11326	10886	9236	8776	12791
hsa-mir-191	9553	6526	10015	9011	15809	13598	14306	15106	13603	11491
hsa-mir-330-3p	9208	5084	3829	4653	10337	7876	4165	5280	4392	4247
hsa-mir-181b	8676	3897	11021	10378	7544	8269	7758	5151	6405	6887
hsa-mir-221*	8172	5427	423	455	10577	9095	369	12700	10765	353
hsa-mir-221	8055	3873	745	758	10944	9261	576	20428	18797	599
hsa-mir-21	7764	4556	3026	3207	9950	8362	3723	7443	7434	3490
hsa-mir-34c-5p	7711	3992	715	1360	5674	4816	601	316	264	126
hsa-mir-185	7482	3846	4305	3902	10539	8619	3462	12885	12362	4245
hsa-mir-30a	6263	3572	5252	5487	8147	6365	7279	9052	8628	8427
hsa-mir-222	6187	3805	428	490	NA	NA	NA	21183	20791	410
hsa-mir-320a	5972	4222	50277	46804	9159	10798	51258	8467	9642	54279
hsa-mir-485-5p	5963	2451	4172	4736	5372	5688	5363	4685	5235	3658
hsa-mir-99a	5567	3342	7795	7168	5653	4796	5354	5213	4706	6645
hsa-mir-152	5523	3347	2171	1928	7377	6273	2888	5379	5584	3539
hsa-mir-99b	5047	3749	9925	11167	3858	3740	9187	3419	3716	14813
hsa-mir-192	4730	2981	27027	24481	6437	5606	33807	1561	1396	6828
hsa-mir-199a-3p	4549	2588	1402	1375	3700	3204	1300	6695	5765	3349
hsa-mir-199b-3p	4549	2588	1402	1375	3700	3204	1300	NA	NA	NA
hsa-mir-9*	4487	2956	5003	5362	5872	5324	7165	7027	6302	6873
hsa-mir-27b	4388	1940	3390	3443	5633	4276	3733	4745	4446	4314
hsa-mir-100	4078	2855	2110	2209	4246	3629	2000	1073	996	1676
hsa-mir-24	3443	1939	1476	1433	3277	2486	1807	4536	4333	1568
hsa-mir-146b-5p	3309	1581	332	344	3352	3614	333	NA	NA	NA
hsa-mir-30d	3299	2044	2737	2688	3338	2819	3011	3947	4072	3515
hsa-mir-138	2962	1704	804	766	2475	2143	700	4006	3911	1023
hsa-mir-139-3p	2754	1390	98	75	2748	2900	131	2329	3255	124
hsa-mir-127-3p	2698	1307	3873	3166	3828	3191	3306	2183	2478	1989
hsa-mir-433	2658	1721	2022	1885	3021	3045	1688	2484	2667	1445
hsa-mir-383	2606	1541	2281	3062	6791	6538	3110	7620	7647	5097
hsa-mir-423-5p	2547	1561	4761	4329	3693	3103	3955	2144	2031	3534
hsa-mir-16	2463	1472	2344	1751	2282	1935	2042	1761	1809	1750
hsa-mir-539_new_star b	2456	1806	915	1143	603	529	291	1925	1677	335
hsa-mir-129-3p	2371	1587	6007	4734	2656	2057	7990	2365	1794	12622
hsa-mir-22	2162	1324	892	877	1922	1654	771	NA	NA	NA
hsa-mir-378	2131	1515	4302	4014	2745	2609	3403	2595	2597	3337
hsa-mir-151-3p	1814	1033	1238	1443	1889	1589	1032	818	645	980
hsa-mir-181d	1780	709	2423	2510	1028	921	1713	2871	2901	3206
hsa-mir-485-3p	1750	1030	1512	1444	1371	1074	603	1961	1684	640
hsa-mir-598	1672	672	3261	2482	2471	1542	4294	3237	2872	2901
hsa-mir-98	1662	892	1596	1584	2085	1678	1458	3086	2848	2148
hsa-mir-432	1661	787	1416	1490	1669	1414	927	1196	1229	782
hsa-mir-342-3p	1617	1033	1289	1123	1416	1145	1066	1804	1794	1419
hsa-mir-323-3p	1595	1021	1552	1747	1957	1688	953	796	728	603
hsa-mir-92b	1574	902	836	651	NA	NA	NA	955	1089	652
hsa-mir-744	1487	999	1138	1063	2081	1933	985	1720	1945	1130
hsa-mir-29b	1346	888	738	726	1573	1376	1591	2521	2590	930
hsa-mir-142-5p	1296	1024	276	298	1404	1357	352	833	784	310
hsa-mir-335	1286	829	469	437	1135	922	478	1502	1438	1791
hsa-mir-125a-5p	1252	893	4365	4278	1437	1337	4258	2071	2095	6231
hsa-mir-25	1217	579	1737	1817	0	0	0	1150	958	1750
hsa-mir-382_new_star	1124	708	2331	2084	1564	1339	1802	1234	1070	1000
hsa-mir-451	1090	216	455	587	837	233	1317	378	153	221
hsa-mir-363	1048	570	245	243	NA	NA	NA	672	633	120
hsa-mir-130a	1048	700	1387	1194	1115	1044	1362	1402	1195	998
hsa-mir-219-5p	1047	704	376	495	1125	958	408	1376	1150	441
hsa-mir-379	1034	609	1373	1153	1317	1229	1299	416	496	594
hsa-mir-495	970	738	1280	1115	1522	1352	1488	2451	2275	770
hsa-mir-137	970	497	16	15	1347	1020	31	2218	1974	32
hsa-mir-15a	922	422	1031	799	849	640	828	423	434	473
hsa-mir-382	908	445	1969	1638	1014	825	1566	842	732	779
hsa-mir-30e	903	491	790	753	825	660	977	1264	1241	895
hsa-mir-212_new_star	852	553	108	107	NA	NA	NA	309	268	51
hsa-mir-543	845	648	1202	1225	1009	883	682	3478	3437	731
hsa-mir-148b	834	557	673	628	1327	1173	794	621	647	647
hsa-mir-487b	823	577	1349	1059	728	579	1249	888	784	469
hsa-mir-338-3p	818	435	399	413	768	665	440	454	463	230
hsa-mir-411	789	461	1511	1606	782	724	1302	2228	2235	2596
hsa-mir-499-5p	776	391	277	299	2139	1626	713	1619	1455	618
hsa-mir-151-5p	772	528	406	389	884	720	377	346	371	249
hsa-mir-889	701	347	1653	1395	562	410	1005	1593	1375	1462
hsa-mir-95	682	246	529	419	732	596	448	1328	1306	422
hsa-mir-93	674	380	314	350	602	571	325	815	816	460
hsa-mir-23b*	560	329	281	279	502	410	234	571	492	488
hsa-mir-106b	555	358	415	351	479	407	340	594	595	394
hsa-mir-129-5p	525	247	1152	1109	724	531	548	2515	2308	528
hsa-mir-374b	522	328	626	553	568	490	641	405	370	324
hsa-mir-122	507	324	3607	254	385	385	346	356	348	174
hsa-mir-186	506	291	566	490	552	382	558	861	699	945
hsa-mir-23b	505	252	642	572	646	532	874	376	355	515
hsa-mir-423-3p	479	290	1091	1136	342	259	687	490	415	904
hsa-mir-486-5p	463	292	1330	1208	334	294	1179	117	126	954
hsa-mir-410	444	260	268	263	563	514	340	835	781	217
hsa-mir-30c	430	258	438	382	444	322	451	637	549	539
hsa-mir-33a	428	215	2245	2221	499	331	1813	NA	NA	NA
hsa-mir-873	407	269	107	146	425	387	93	789	671	243
hsa-mir-708	401	246	125	106	381	366	106	503	478	50
hsa-mir-885-3p	393	414	2303	2106	413	807	1344	395	849	1855
hsa-mir-584	392	84	36	60	377	157	27	127	100	54
hsa-mir-130b	385	261	355	323	332	373	553	299	258	233
hsa-mir-195	358	250	990	856	404	351	967	552	542	782
hsa-mir-27a	345	195	229	222	307	274	178	487	517	190
hsa-mir-127-5p	344	224	377	399	497	440	384	389	326	306
hsa-mir-31	341	215	586	661	471	410	107	1247	1120	813
hsa-mir-139-5p	329	171	11	16	523	368	23	525	509	25
hsa-mir-181c	324	244	297	243	289	263	241	1010	1164	506
hsa-mir-488*	319	178	209	194	556	398	219	248	211	180
hsa-mir-497	317	190	887	836	278	235	651	811	744	989
hsa-mir-129*	314	176	541	393	185	164	558	276	201	532
hsa-mir-134	304	166	190	138	577	555	278	194	257	69
hsa-mir-1307_new_star	302	191	442	130	331	270	103	851	1177	85
hsa-mir-374a	295	159	204	224	300	292	210	163	141	113
hsa-mir-1301	294	166	151	113	NA	NA	NA	NA	NA	NA
hsa-mir-374a*	285	144	299	329	425	351	336	240	205	133
hsa-mir-148a	285	203	194	173	300	241	121	288	306	238
hsa-mir-409-3p	284	175	495	462	194	181	237	299	307	306
hsa-mir-92a	271	145	126	90	321	275	94	191	187	64
hsa-mir-23a	268	131	161	160	265	215	210	280	257	106
hsa-mir-15b	259	166	140	104	243	217	187	115	133	101
hsa-mir-135a_new_star	251	169	33	32	400	363	49	308	317	44
hsa-mir-132	238	154	66	49	NA	NA	NA	342	364	54
hsa-mir-17*	238	170	150	130	178	158	131	170	165	86
hsa-mir-181a*	233	139	195	195	252	208	177	146	138	171
hsa-mir-17	232	151	92	102	222	230	98	158	146	65
hsa-mir-664*	227	115	177	182	248	295	209	614	780	911
hsa-mir-409-5p	218	132	206	217	156	142	140	251	226	142
hsa-mir-30a*	217	129	270	319	324	272	338	454	486	385
hsa-mir-22*	205	126	88	94	232	205	105	NA	NA	NA
hsa-mir-132*	204	115	45	46	NA	NA	NA	275	273	51
hsa-mir-361-5p	200	105	183	167	247	191	216	497	481	322
hsa-mir-144*	200	86	63	100	118	126	109	26	24	19
hsa-mir-30e*	188	90	213	196	219	213	175	265	245	146
hsa-mir-30c-2*	186	118	200	201	175	175	230	232	186	353
hsa-mir-532-5p	165	124	510	377	183	205	749	154	177	316
hsa-mir-1271	162	127	145	119	460	410	158	239	193	173
hsa-mir-320b	162	113	1311	1434	179	169	1244	100	82	885
hsa-mir-628-5p	161	92	87	91	219	170	87	172	158	91
hsa-mir-448	160	84	7	12	348	265	13	188	147	12
hsa-mir-769-5p	147	83	24	18	NA	NA	NA	108	117	18
hsa-mir-99b*	140	81	365	374	106	122	322	177	230	512
hsa-mir-494	135	93	92	105	123	102	100	30	29	18
hsa-mir-126	134	93	65	60	130	126	83	297	309	84
hsa-mir-421	132	73	68	79	142	114	40	96	87	39
hsa-mir-361-3p	130	92	84	95	134	97	111	168	175	191
hsa-mir-181a-2*	125	84	232	187	66	71	75	120	109	104
hsa-mir-338-5p	123	74	55	71	115	93	56	34	26	35
hsa-mir-376c	117	97	958	725	203	214	1238	103	103	244
hsa-mir-210	111	47	84	115	116	138	63	77	89	81
hsa-mir-143*	110	58	76	66	74	59	44	249	207	76
hsa-mir-145	110	58	61	30	83	88	79	54	34	25
hsa-mir-487a	110	56	57	70	44	40	29	0	0	0
hsa-mir-1250	110	65	55	58	118	133	59	3	4	0
hsa-mir-1224-5p	110	84	920	748	62	139	873	75	142	597
hsa-mir-153	108	59	40	36	105	94	47	272	257	42
hsa-mir-1277	105	58	100	88	NA	NA	NA	303	302	142
hsa-mir-504	104	58	16	9	92	84	8	226	208	9
hsa-mir-369-5p	102	76	172	175	107	82	132	206	196	122
hsa-mir-886-5p	101	104	27	48	113	141	79	21	30	33
hsa-mir-1185	97	48	145	119	206	142	151	236	186	133
hsa-mir-28-3p	94	53	162	173	181	135	193	60	56	186
hsa-mir-184	90	55	50	55	12	13	8	8	7	6
hsa-mir-328	89	72	47	56	93	82	45	NA	NA	NA
hsa-mir-431*	87	55	66	43	117	89	57	65	83	34
hsa-mir-136	85	41	209	212	109	70	231	133	105	157
hsa-mir-126*	85	34	39	22	123	103	51	215	217	44
hsa-mir-146a	83	49	27	24	49	49	11	164	172	38
hsa-mir-106b*	81	41	109	113	64	70	85	63	67	119
hsa-mir-708*	80	45	26	29	75	72	23	103	81	28
hsa-mir-655	80	77	134	126	84	59	131	NA	NA	NA
hsa-mir-28-5p	79	41	139	142	81	57	141	125	102	150
hsa-mir-490-3p	74	54	19	14	83	67	24	107	106	17
hsa-mir-1307	74	51	129	123	32	66	65	48	99	82
hsa-mir-424	74	58	20	23	112	106	55	96	90	31
hsa-mir-25*	72	72	145	161	104	93	84	88	101	122
hsa-mir-452	72	37	32	36	19	22	13	175	159	135
hsa-mir-503	71	34	11	13	62	87	16	145	180	21
hsa-mir-1259	69	28	12	30	48	44	23	8	5	4
hsa-mir-204	68	50	890	943	78	72	1540	59	56	374
hsa-mir-212	68	36	9	12	NA	NA	NA	9	11	2
hsa-mir-1291	66	28	34	48	16	10	30	0	0	0
hsa-mir-935	66	39	16	7	74	64	15	NA	NA	NA
hsa-mir-92b*	66	74	72	86	NA	NA	NA	39	88	115
hsa-mir-128_new_star	66	33	48	71	27	37	56	49	54	106
hsa-mir-203	65	25	5	1	41	41	1	19	6	1
hsa-mir-1270	64	46	25	31	NA	NA	NA	0	0	0
hsa-mir-324-5p	62	47	101	67	73	70	95	111	103	74
hsa-mir-1255a	60	57	146	163	NA	NA	NA	NA	NA	NA
hsa-mir-135a	60	7	14	17	69	43	29	157	111	18
hsa-mir-124*	60	39	111	106	64	52	115	165	139	144
hsa-mir-374b*	59	33	61	59	69	38	63	80	46	66
hsa-mir-193b*	58	42	19	27	132	119	48	110	116	54
hsa-mir-1185_new_star	57	27	33	25	23	11	12	90	80	17
hsa-mir-323-5p	57	32	55	57	46	64	44	17	33	17
hsa-mir-154*	57	53	73	66	25	28	40	72	63	37
hsa-mir-187	57	12	18	12	NA	NA	NA	57	47	7
hsa-mir-574-3p	56	30	17	23	NA	NA	NA	NA	NA	NA
hsa-mir-342-5p	56	31	142	132	48	51	77	94	87	203
hsa-mir-218	56	30	140	141	104	64	248	124	102	139
hsa-mir-548e	54	55	64	77	14	12	23	NA	NA	NA
hsa-mir-320c	53	40	339	468	39	39	203	17	14	101
hsa-mir-145*	53	35	23	16	49	40	16	90	105	24
hsa-mir-194	53	47	222	182	20	26	378	53	47	179
hsa-mir-181c*	52	42	60	58	64	42	42	96	121	129
hsa-mir-329	51	41	70	62	51	65	35	12	18	6
hsa-mir-193a-5p	51	25	187	141	70	51	146	95	93	14
hsa-mir-136*	51	35	109	99	102	66	99	82	69	77
hsa-mir-433_new_star	51	13	7	12	36	26	13	42	30	8
hsa-mir-425*	48	42	80	53	56	76	58	38	48	43
hsa-mir-1298	44	12	4	10	20	7	4	23	17	11
hsa-mir-1248	44	27	12	19	8	5	13	1	0	4
hsa-mir-1249	44	18	4	5	58	41	14	8	6	7
hsa-mir-33b	43	24	36	24	25	14	11	119	96	12
hsa-mir-144	43	36	13	15	35	28	35	35	34	17
hsa-mir-941	42	20	95	116	NA	NA	NA	NA	NA	NA
hsa-mir-370	41	28	55	55	28	40	28	37	35	31
hsa-mir-369-3p	41	23	70	41	29	19	35	58	56	28
hsa-mir-660	39	25	134	124	47	59	201	54	67	48
hsa-mir-148b*	39	15	23	24	34	26	43	21	16	40
hsa-mir-1252	39	27	102	99	24	25	83	0	0	0
hsa-mir-125b-2*	39	26	98	118	50	41	59	45	46	59
hsa-mir-20a	38	23	21	11	47	45	34	36	36	25
hsa-mir-760	38	32	58	57	35	60	71	71	87	86
hsa-mir-217	37	15	6	5	30	17	1	36	31	1
hsa-mir-425	37	33	56	56	85	51	82	69	60	56
hsa-mir-1299	35	8	7	9	38	26	0	NA	NA	NA
hsa-mir-346	34	17	15	12	58	50	22	23	34	10
hsa-mir-29b-2*	34	6	15	27	26	24	23	49	47	33
hsa-mir-24-1*	34	14	16	15	28	26	15	20	17	11
hsa-mir-365_new_star	34	19	30	22	32	35	15	32	26	13
hsa-mir-301a_new_star	34	24	35	41	47	48	59	71	54	61
hsa-mir-99a*	33	14	57	41	42	25	51	61	45	41
hsa-mir-329_new_star	33	16	32	30	68	55	36	6	3	4
hsa-mir-299-3p	32	24	129	101	218	195	695	828	898	1656
hsa-mir-502-3p	31	16	90	75	42	27	93	51	55	63
hsa-mir-380*	31	28	35	52	24	12	30	4	4	6
hsa-mir-182	30	7	12	15	15	13	10	0	3	18
hsa-mir-424*	29	14	5	7	30	32	7	34	34	3
hsa-mir-185*	29	12	24	17	28	41	10	33	26	20
hsa-mir-1262	28	13	5	7	79	67	45	150	142	46
hsa-mir-30b	28	20	58	49	31	26	79	48	40	39
hsa-mir-412_new_star	28	13	19	14	25	22	22	18	33	18
hsa-mir-34b*	28	1	2	4	3	4	1	0	0	0
hsa-mir-548k	28	23	35	38	45	24	42	0	0	0
hsa-mir-106a	27	33	16	12	11	18	7	6	19	6
hsa-mir-656	27	18	37	33	36	41	51	52	55	37
hsa-mir-20b	26	13	10	13	14	9	6	6	5	4
hsa-mir-381	26	18	106	102	11	7	48	24	31	36
hsa-mir-1197	26	8	4	3	27	28	6	16	15	1
hsa-mir-125b-1*	26	13	4	5	22	21	2	4	7	3
hsa-mir-505*	26	21	44	69	30	34	22	24	25	27
hsa-mir-377*	25	14	29	42	37	26	35	22	16	11
hsa-mir-27b*	25	14	7	16	12	12	13	32	18	13
hsa-mir-365	25	12	16	11	31	23	24	23	15	2
hsa-mir-206	24	11	6112	4583	136	110	8897	23	23	9597
hsa-mir-876-3p	24	13	2	4	33	25	1	39	51	7
hsa-mir-874	24	19	98	79	18	23	133	19	15	16
hsa-mir-767-5p	24	12	9	10	NA	NA	NA	134	150	18
hsa-mir-339-3p	24	19	48	24	43	16	62	133	126	77
hsa-mir-200a	24	19	4	6	21	16	4	1	2	2
hsa-mir-7_new_star	23	8	20	13	21	20	24	29	32	29
hsa-let-7d*	23	25	19	9	20	38	25	27	34	15
hsa-mir-876-5p	23	13	15	10	19	9	14	76	51	30
hsa-mir-30b*	23	14	36	42	24	28	36	33	40	49
hsa-mir-19b	22	17	21	13	28	26	28	10	16	5
hsa-mir-376b	21	7	85	69	42	38	140	16	26	32
hsa-mir-548o	21	10	14	19	23	29	16	0	0	1
hsa-mir-625	21	12	24	28	NA	NA	NA	0	0	0
hsa-mir-577	21	13	9	11	44	41	2	10	6	5
hsa-mir-10a	20	11	20	20	2	3	10	3	1	20
hsa-mir-668	20	10	16	11	23	12	6	68	46	15
hsa-mir-223	20	13	10	7	27	33	13	5	4	2
hsa-mir-873_new_star	20	18	5	13	24	23	7	35	37	14
hsa-mir-940	19	9	18	12	19	24	15	6	8	5
hsa-mir-582-3p	19	11	0	1	12	12	1	1	3	2
hsa-mir-376a	19	14	41	22	36	27	28	16	10	6
hsa-mir-34a	19	8	10	9	23	10	20	49	58	13
hsa-mir-375	19	4	6	8	76	37	9	33	33	6
hsa-mir-589	18	12	6	6	1	0	1	0	0	0
hsa-mir-511_new_star	18	12	0	2	16	23	7	39	26	19
hsa-mir-193a-3p	17	16	58	56	20	17	68	32	32	7
hsa-mir-1287	17	13	8	5	0	0	0	0	0	0
hsa-mir-509-3-5p	17	10	2	4	5	4	0	NA	NA	NA
hsa-mir-766_new_star	16	10	25	31	19	20	26	0	0	1
hsa-mir-491-5p	16	13	16	13	17	12	14	28	23	17
hsa-mir-654-5p	16	8	28	23	38	14	25	8	3	13
hsa-mir-484	16	9	37	50	8	10	38	13	20	49
hsa-mir-193b	15	11	5	2	21	19	8	9	9	6
hsa-mir-181b_new_star	15	14	15	13	29	25	16	15	20	18
hsa-mir-576-3p	15	9	26	23	0	0	0	0	1	1
hsa-mir-592	15	6	2	2	20	13	5	38	22	3
hsa-mir-204_new_star	15	12	143	131	14	22	133	26	33	82
hsa-mir-1278	15	17	10	14	4	4	2	0	0	0
hsa-mir-500*	15	12	102	75	18	22	56	11	10	19
hsa-mir-24-2*	14	11	7	11	9	10	9	26	18	8
hsa-mir-652	14	6	5	10	8	13	5	8	3	4
hsa-mir-548a-3p	14	5	17	11	0	2	4	0	0	0
hsa-mir-320d	14	13	127	178	23	16	72	7	10	53
hsa-mir-641	14	10	31	35	0	0	0	NA	NA	NA
hsa-mir-299-5p	14	11	41	15	12	10	85	34	30	54
hsa-mir-493*	14	7	19	32	NA	NA	NA	33	29	22
hsa-mir-487a_new_star	14	8	22	31	23	9	20	0	0	0
hsa-let-7a*	14	9	14	12	9	15	21	29	19	19
hsa-mir-363*	14	5	5	3	NA	NA	NA	1	3	1
hsa-mir-496	14	7	4	4	15	6	4	12	9	3
hsa-mir-29a*	13	5	3	6	NA	NA	NA	11	9	4
hsa-mir-551b	13	9	22	14	20	22	17	10	10	7
hsa-let-7e*	13	9	14	20	20	22	42	24	27	33
hsa-mir-1180	13	5	4	3	NA	NA	NA	12	13	3
hsa-mir-542-3p	13	7	6	3	NA	NA	NA	3	3	0
hsa-mir-1258	13	5	10	21	9	13	9	0	0	0
hsa-mir-7-1*	12	12	47	38	18	13	50	29	23	49
hsa-mir-377	12	8	24	26	11	7	18	14	16	4
hsa-mir-1255b	12	7	7	7	13	9	5	4	2	1
hsa-mir-1179	12	1	3	1	22	13	9	5	1	3
hsa-mir-516a-5p	12	2	1	0	4	2	0	0	0	0
hsa-mir-1826_new_star	12	8	31	8	16	18	0	NA	NA	NA
hsa-mir-137_new_star	12	6	1	0	15	18	0	14	10	1
hsa-mir-197	11	6	30	28	16	13	39	13	7	16
hsa-mir-331-3p	11	4	26	28	28	10	33	27	32	15
hsa-mir-885-5p	11	8	20	25	10	7	18	11	6	14
hsa-mir-769-3p	11	11	17	22	NA	NA	NA	16	22	13
hsa-mir-92a-1*	11	7	8	5	9	4	5	NA	NA	NA
hsa-mir-877	11	9	13	14	4	9	10	14	15	14
hsa-let-7b*	11	10	1	3	7	14	4	4	3	0
hsa-mir-1285	11	13	10	10	21	22	14	NA	NA	NA
hsa-mir-30c-1*	11	8	17	20	7	19	23	28	31	24
hsa-mir-149	10	9	11	8	17	11	20	12	18	14
hsa-mir-532-3p	10	9	42	32	11	7	68	8	7	28
hsa-mir-155	10	4	3	2	27	11	1	18	15	5
hsa-mir-16-2*	10	9	2	2	13	8	4	14	15	10
hsa-mir-450a	10	5	2	2	20	21	5	2	2	2
hsa-mir-654-3p	10	6	41	34	17	17	29	19	15	19
hsa-mir-138-1*	10	5	0	1	NA	NA	NA	NA	NA	NA
hsa-mir-582-5p	10	5	1	0	11	7	0	10	5	0
hsa-mir-874_new_star	10	3	27	27	5	1	20	6	6	5
hsa-mir-20b*	10	8	5	10	2	1	11	1	1	0
hsa-mir-199b-5p	10	6	2	2	3	5	4	NA	NA	NA
hsa-mir-29c*	10	3	6	7	9	7	14	9	9	6
hsa-mir-625*	10	8	18	24	NA	NA	NA	0	0	0
hsa-mir-651	9	4	6	10	34	21	17	0	0	0
hsa-mir-223*	9	8	1	4	24	24	8	8	8	4
hsa-mir-590-5p	9	6	7	7	9	5	18	2	0	0
hsa-mir-34a*	9	6	5	3	5	6	3	10	11	9
hsa-mir-140-5p	8	3	3	10	8	3	7	11	10	8
hsa-mir-1292	8	2	6	4	2	4	3	0	0	1
hsa-mir-887	8	3	0	3	5	6	0	7	2	3
hsa-mir-130b*	8	3	7	7	3	4	14	7	6	8
hsa-mir-508-3p	8	2	1	0	4	1	0	2	2	0
hsa-mir-642_new_star	7	6	0	0	0	0	0	0	0	0
hsa-mir-190	7	3	1	2	7	5	2	3	6	4
hsa-mir-516b	7	12	3	5	14	9	0	0	0	0
hsa-mir-216b	7	11	6	3	5	9	1	27	16	1
hsa-mir-664	7	6	8	6	19	10	11	37	36	20
hsa-mir-154	7	1	45	24	6	5	20	28	26	23
hsa-mir-501-3p	7	3	22	22	4	7	19	3	3	1
hsa-mir-490-5p	7	3	3	3	10	9	5	31	14	1
hsa-mir-32	7	4	12	10	10	5	3	15	12	10
hsa-mir-339-5p	7	3	1	8	8	4	3	10	14	16
hsa-mir-758_new_star	7	8	13	11	10	7	13	7	5	3
hsa-mir-629	6	3	6	16	NA	NA	NA	NA	NA	NA
hsa-mir-381_new_star	6	1	39	35	12	7	29	13	10	23
hsa-mir-576-5p	6	3	4	8	0	0	0	0	0	0
hsa-let-7i*	6	3	12	13	6	4	12	3	3	12
hsa-mir-362-5p	5	0	24	15	2	4	12	5	2	5
hsa-mir-765	5	5	5	4	6	3	3	0	0	0
hsa-mir-380	5	3	11	6	7	6	9	10	13	10
hsa-mir-455-5p	5	3	186	200	5	4	161	19	14	143
hsa-mir-301a	5	4	23	19	17	10	18	22	15	17
hsa-mir-218-2*	4	3	16	12	9	7	19	9	15	18
hsa-mir-224	4	6	0	5	12	10	4	16	15	9
hsa-mir-18a	4	7	5	0	6	10	7	5	3	1
hsa-mir-1306_new_star	4	2	12	17	13	16	33	7	2	15
hsa-mir-370_new_star	4	5	4	6	6	2	6	3	6	4
hsa-mir-345	4	1	11	8	8	7	1	0	0	0
hsa-mir-1306	4	5	14	11	9	9	8	5	15	21
hsa-mir-541*	4	1	5	9	0	0	0	33	30	48
hsa-mir-191*	4	3	6	4	3	2	3	5	8	2
hsa-mir-33a*	4	1	10	45	16	6	77	NA	NA	NA
hsa-mir-486-3p	4	4	142	147	15	10	128	9	15	124
hsa-mir-337-5p	3	1	2	9	2	2	7	1	1	1
hsa-mir-411*	3	1	4	7	6	6	4	5	3	6
hsa-mir-125a-3p	3	1	13	13	1	5	12	9	3	20
hsa-mir-362-3p	3	4	19	14	4	5	26	14	4	6
hsa-mir-1266	3	5	15	21	5	6	5	0	0	0
hsa-mir-496_new_star	2	1	5	6	2	2	1	1	2	0
hsa-mir-660_new_star	2	2	9	10	3	1	6	6	5	8
hsa-mir-539	2	3	15	16	2	6	15	5	7	4
hsa-mir-10b	2	1	5	5	1	3	0	5	4	7
hsa-mir-455-3p	2	7	192	186	7	4	343	20	10	89
hsa-mir-215	2	2	32	45	8	7	19	4	1	6
hsa-mir-599_new_star	2	1	5	5	2	2	27	1	1	4
hsa-mir-505	2	3	9	8	1	2	6	5	4	3
hsa-mir-449b	1	0	3	7	0	0	1	2	0	2
hsa-mir-1286	1	1	9	12	5	7	9	0	0	0
hsa-mir-618	1	1	9	9	0	3	11	0	0	0
hsa-mir-302a*	0	2	4	7	0	0	1	1	0	0
hsa-mir-891a	0	0	5	6	1	1	2	7	7	0
hsa-mir-135b	0	0	170	154	1	1	162	4	3	114
miRNA with at least 10 reads in cortex or cerebellum were listed.
a NA means no miRNA ortholog could be found in chimpanzee or rhesus macaque genome (see Materials and Methods)
b hsa-mir-539_newstar is one novel miRNA that is derived from the opposite strand of hsa-mir-539, the same nomenclature for the other newstar novel miRNAs.
c Abbreviations:
CX_Hu1 : human prefrontal cortex pool1; CX_Hu2 : technical replicate of human prefrontal cortex pool1
CX_Ch1 : chimpanzee prefrontal cortex pool1; CX_Ch2 : technical replicate of chimpanzee prefrontal cortex pool1
CX_Ma1 : macaque prefrontal cortex pool1; CX_Ma2 : technical replicate of macaque prefrontal cortex pool1
CB_Hu1 : human cerebellum pool1; CB_Hu2 : human cerebellum pool2
CB_Ch1 : chimpanzee cerebellum pool1
CB_Ma1 : macaque cerebellum pool1

## Sheet: PFC (Human & Chimpanzee)
miRNA ID	CX_Hu1a	CX_Hu2	CX_Ch1	CX_Ch2
hsa-let-7f	1109744	536619	1134988	903247
hsa-let-7g	488020	197396	552919	397753
hsa-let-7a	258328	127797	309572	246407
hsa-let-7c	251434	116963	259457	206023
hsa-let-7b	107452	51087	126911	107430
hsa-mir-219-2-3p	74322	16736	39474	26098
hsa-mir-103	61813	38947	86561	78021
hsa-mir-128	59487	45527	66988	64891
hsa-mir-1	58731	41517	64004	61757
hsa-mir-7	35937	20920	19121	15646
hsa-mir-107	32862	20886	51292	46558
hsa-let-7e	29090	14456	34013	27591
hsa-mir-143	28302	18988	15183	13555
hsa-let-7i	27600	9418	29665	20032
hsa-mir-124	23626	15310	24484	21771
hsa-mir-140-3p	22481	16556	25161	25670
hsa-mir-181a	22259	13773	21325	25892
hsa-mir-340	21741	13443	26919	23656
hsa-mir-26a	20495	12333	22164	19809
hsa-let-7d	19084	11021	27063	24488
hsa-mir-101	17323	9684	19544	16399
hsa-mir-125b	12622	8501	14835	13256
hsa-mir-29c	12247	7294	11824	9714
hsa-mir-9	12085	4952	14222	10019
hsa-mir-26b	11300	6364	13173	11326
hsa-mir-191	9553	6526	15809	13598
hsa-mir-330-3p	9208	5084	10337	7876
hsa-mir-181b	8676	3897	7544	8269
hsa-mir-221*	8172	5427	10577	9095
hsa-mir-221	8055	3873	10944	9261
hsa-mir-21	7764	4556	9950	8362
hsa-mir-34c-5p	7711	3992	5674	4816
hsa-mir-185	7482	3846	10539	8619
hsa-mir-30a	6263	3572	8147	6365
hsa-mir-320a	5972	4222	9159	10798
hsa-mir-485-5p	5963	2451	5372	5688
hsa-mir-99a	5567	3342	5653	4796
hsa-mir-152	5523	3347	7377	6273
hsa-mir-99b	5047	3749	3858	3740
hsa-mir-192	4730	2981	6437	5606
hsa-mir-199a-3p	4549	2588	3700	3204
hsa-mir-199b-3p	4549	2588	3700	3204
hsa-mir-9*	4487	2956	5872	5324
hsa-mir-27b	4388	1940	5633	4276
hsa-mir-100	4078	2855	4246	3629
hsa-mir-24	3443	1939	3277	2486
hsa-mir-146b-5p	3309	1581	3352	3614
hsa-mir-30d	3299	2044	3338	2819
hsa-mir-138	2962	1704	2475	2143
hsa-mir-139-3p	2754	1390	2748	2900
hsa-mir-127-3p	2698	1307	3828	3191
hsa-mir-433	2658	1721	3021	3045
hsa-mir-383	2606	1541	6791	6538
hsa-mir-423-5p	2547	1561	3693	3103
hsa-mir-16	2463	1472	2282	1935
hsa-mir-539_new_star	2456	1806	603	530
hsa-mir-129-3p	2371	1587	2656	2057
hsa-mir-22	2162	1324	1922	1654
hsa-mir-378	2131	1515	2745	2609
hsa-mir-151-3p	1814	1033	1889	1589
hsa-mir-181d	1780	709	1028	921
hsa-mir-485-3p	1750	1030	1371	1074
hsa-mir-598	1672	672	2471	1542
hsa-mir-98	1662	892	2085	1678
hsa-mir-432	1661	787	1669	1414
hsa-mir-342-3p	1617	1033	1416	1145
hsa-mir-323-3p	1595	1021	1957	1688
hsa-mir-744	1487	999	2081	1933
hsa-mir-29b	1346	888	1573	1376
hsa-mir-142-5p	1296	1024	1404	1357
hsa-mir-335	1286	829	1135	922
hsa-mir-125a-5p	1252	893	1437	1337
hsa-mir-382_new_star	1124	708	1564	1339
hsa-mir-451	1090	216	837	233
hsa-mir-130a	1048	700	1115	1044
hsa-mir-219-5p	1047	704	1125	958
hsa-mir-379	1034	609	1317	1229
hsa-mir-495	970	738	1522	1352
hsa-mir-137	970	497	1347	1020
hsa-mir-15a	922	422	849	640
hsa-mir-382	908	445	1014	825
hsa-mir-30e	903	491	825	660
hsa-mir-543	845	648	1009	883
hsa-mir-148b	834	557	1327	1173
hsa-mir-487b	823	577	728	579
hsa-mir-338-3p	818	435	768	665
hsa-mir-411	789	461	782	724
hsa-mir-499-5p	776	391	2139	1626
hsa-mir-151-5p	772	528	884	720
hsa-mir-889	701	347	562	410
hsa-mir-95	682	246	732	596
hsa-mir-93	674	380	602	571
hsa-mir-23b*	560	329	502	410
hsa-mir-106b	555	358	479	407
hsa-mir-129-5p	525	247	724	531
hsa-mir-374b	522	328	568	490
hsa-mir-122	507	324	385	385
hsa-mir-186	506	291	552	382
hsa-mir-23b	505	252	646	532
hsa-mir-423-3p	479	290	342	259
hsa-mir-486-5p	463	292	334	294
hsa-mir-410	444	260	563	514
hsa-mir-30c	430	258	444	322
hsa-mir-33a	428	215	499	331
hsa-mir-873	407	269	425	387
hsa-mir-708	401	246	381	366
hsa-mir-885-3p	393	414	413	807
hsa-mir-584	392	84	377	157
hsa-mir-130b	385	261	332	373
hsa-mir-195	358	250	404	351
hsa-mir-27a	345	195	307	274
hsa-mir-127-5p	344	224	497	440
hsa-mir-31	341	215	471	410
hsa-mir-139-5p	329	171	523	368
hsa-mir-181c	324	244	289	263
hsa-mir-488*	319	178	556	398
hsa-mir-497	317	190	278	235
hsa-mir-129*	314	176	185	164
hsa-mir-134	304	166	577	555
hsa-mir-1307_new_star	302	191	331	270
hsa-mir-374a	295	159	300	292
hsa-mir-374a*	285	144	425	351
hsa-mir-148a	285	203	300	241
hsa-mir-409-3p	284	175	194	181
hsa-mir-92a	271	145	321	275
hsa-mir-23a	268	131	265	215
hsa-mir-15b	259	166	243	217
hsa-mir-135a_new_star	251	169	400	363
hsa-mir-17*	238	170	178	158
hsa-mir-181a*	233	139	252	208
hsa-mir-17	232	151	222	230
hsa-mir-664*	227	115	248	295
hsa-mir-409-5p	218	132	156	142
hsa-mir-30a*	217	129	324	272
hsa-mir-22*	205	126	232	205
hsa-mir-361-5p	200	105	247	191
hsa-mir-144*	200	86	118	126
hsa-mir-30e*	188	90	219	213
hsa-mir-30c-2*	186	118	175	175
hsa-mir-532-5p	165	124	183	205
hsa-mir-1271	162	127	460	410
hsa-mir-320b	162	113	179	169
hsa-mir-628-5p	161	92	219	170
hsa-mir-448	160	84	348	265
hsa-mir-99b*	140	81	106	122
hsa-mir-494	135	93	123	102
hsa-mir-126	134	93	130	126
hsa-mir-421	132	73	142	114
hsa-mir-361-3p	130	92	134	97
hsa-mir-181a-2*	125	84	66	71
hsa-mir-338-5p	123	74	115	93
hsa-mir-376c	117	97	203	214
hsa-mir-210	111	47	116	138
hsa-mir-143*	110	58	74	59
hsa-mir-145	110	58	83	88
hsa-mir-487a	110	56	44	40
hsa-mir-1250	110	65	118	133
hsa-mir-1224-5p	110	84	62	139
hsa-mir-153	108	59	105	94
hsa-mir-504	104	58	92	84
hsa-mir-369-5p	102	76	107	82
hsa-mir-886-5p	101	104	113	141
hsa-mir-1185	97	48	206	142
hsa-mir-28-3p	94	53	181	135
hsa-mir-184	90	55	12	13
hsa-mir-328	89	72	93	82
hsa-mir-431*	87	55	117	89
hsa-mir-136	85	41	109	70
hsa-mir-126*	85	34	123	103
hsa-mir-146a	83	49	49	49
hsa-mir-106b*	81	41	64	70
hsa-mir-708*	80	45	75	72
hsa-mir-655	80	77	84	59
hsa-mir-28-5p	79	41	81	57
hsa-mir-490-3p	74	54	83	67
hsa-mir-1307	74	51	32	66
hsa-mir-424	74	58	112	106
hsa-mir-25*	72	72	104	93
hsa-mir-452	72	37	19	22
hsa-mir-503	71	34	62	87
hsa-mir-1259	69	28	48	44
hsa-mir-204	68	50	78	72
hsa-mir-1291	66	28	16	10
hsa-mir-935	66	39	74	64
hsa-mir-128_new_star	66	33	27	37
hsa-mir-203	65	25	41	41
hsa-mir-324-5p	62	47	73	70
hsa-mir-135a	60	7	69	43
hsa-mir-124*	60	39	64	52
hsa-mir-374b*	59	33	69	38
hsa-mir-193b*	58	42	132	119
hsa-mir-1185_new_star	57	27	23	11
hsa-mir-323-5p	57	32	46	64
hsa-mir-154*	57	53	25	28
hsa-mir-342-5p	56	31	48	51
hsa-mir-218	56	30	104	64
hsa-mir-548e	54	55	14	12
hsa-mir-320c	53	40	39	39
hsa-mir-145*	53	35	49	40
hsa-mir-194	53	47	20	26
hsa-mir-181c*	52	42	64	42
hsa-mir-329	51	41	51	65
hsa-mir-193a-5p	51	25	70	51
hsa-mir-136*	51	35	102	66
hsa-mir-433_new_star	51	13	36	26
hsa-mir-425*	48	42	56	76
hsa-mir-1298	44	12	20	7
hsa-mir-1248	44	27	8	5
hsa-mir-1249	44	18	58	41
hsa-mir-33b	43	24	25	14
hsa-mir-144	43	36	35	28
hsa-mir-370	41	28	28	40
hsa-mir-369-3p	41	23	29	19
hsa-mir-660	39	25	47	59
hsa-mir-148b*	39	15	34	26
hsa-mir-1252	39	27	24	25
hsa-mir-125b-2*	39	26	50	41
hsa-mir-20a	38	23	47	45
hsa-mir-760	38	32	35	60
hsa-mir-217	37	15	30	17
hsa-mir-425	37	33	85	51
hsa-mir-346	34	17	58	50
hsa-mir-29b-2*	34	6	26	24
hsa-mir-24-1*	34	14	28	26
hsa-mir-365_new_star	34	19	32	35
hsa-mir-301a_new_star	34	24	47	48
hsa-mir-99a*	33	14	42	25
hsa-mir-329_new_star	33	16	68	55
hsa-mir-299-3p	32	24	218	195
hsa-mir-502-3p	31	16	42	27
hsa-mir-380*	31	28	24	12
hsa-mir-182	30	7	15	13
hsa-mir-424*	29	14	30	32
hsa-mir-185*	29	12	28	41
hsa-mir-1262	28	13	79	67
hsa-mir-30b	28	20	31	26
hsa-mir-412_new_star	28	13	25	22
hsa-mir-34b*	28	1	3	4
hsa-mir-548k	28	23	45	24
hsa-mir-106a	27	33	11	18
hsa-mir-656	27	18	36	41
hsa-mir-20b	26	13	14	9
hsa-mir-381	26	18	11	7
hsa-mir-1197	26	8	27	28
hsa-mir-125b-1*	26	13	22	21
hsa-mir-505*	26	21	30	34
hsa-mir-377*	25	14	37	26
hsa-mir-27b*	25	14	12	12
hsa-mir-365	25	12	31	23
hsa-mir-206	24	11	136	110
hsa-mir-876-3p	24	13	33	25
hsa-mir-874	24	19	18	23
hsa-mir-339-3p	24	19	43	16
hsa-mir-200a	24	19	21	16
hsa-mir-7_new_star	23	8	21	20
hsa-let-7d*	23	25	20	38
hsa-mir-876-5p	23	13	19	9
hsa-mir-30b*	23	14	24	28
hsa-mir-19b	22	17	28	26
hsa-mir-376b	21	7	42	38
hsa-mir-548o	21	10	23	29
hsa-mir-577	21	13	44	41
hsa-mir-10a	20	11	2	3
hsa-mir-668	20	10	23	12
hsa-mir-223	20	13	27	33
hsa-mir-873_new_star	20	18	24	23
hsa-mir-940	19	9	19	24
hsa-mir-582-3p	19	11	12	12
hsa-mir-376a	19	14	36	27
hsa-mir-34a	19	8	23	10
hsa-mir-375	19	4	76	37
hsa-mir-589	18	12	1	0
hsa-mir-511_new_star	18	12	16	23
hsa-mir-193a-3p	17	16	20	17
hsa-mir-1287	17	13	0	0
hsa-mir-509-3-5p	17	10	5	4
hsa-mir-766_new_star	16	10	19	20
hsa-mir-491-5p	16	13	17	12
hsa-mir-654-5p	16	8	38	14
hsa-mir-484	16	9	8	10
hsa-mir-193b	15	11	21	19
hsa-mir-181b_new_star	15	14	29	25
hsa-mir-576-3p	15	9	0	0
hsa-mir-592	15	6	20	13
hsa-mir-204_new_star	15	12	14	22
hsa-mir-1278	15	17	4	4
hsa-mir-500*	15	12	18	22
hsa-mir-24-2*	14	11	9	10
hsa-mir-652	14	6	8	13
hsa-mir-320d	14	13	23	16
hsa-mir-641	14	10	0	0
hsa-mir-299-5p	14	11	12	10
hsa-mir-487a_new_star	14	8	23	9
hsa-let-7a*	14	9	9	15
hsa-mir-496	14	7	15	6
hsa-mir-551b	13	9	20	22
hsa-let-7e*	13	9	20	22
hsa-mir-1258	13	5	9	13
hsa-mir-7-1*	12	12	18	13
hsa-mir-377	12	8	11	7
hsa-mir-1255b	12	7	13	9
hsa-mir-1179	12	1	22	13
hsa-mir-137_new_star	12	6	15	18
hsa-mir-197	11	6	16	13
hsa-mir-331-3p	11	4	28	10
hsa-mir-877	11	9	4	9
hsa-let-7b*	11	10	7	14
hsa-mir-1285	11	13	21	22
hsa-mir-30c-1*	11	8	7	19
hsa-mir-149	10	9	17	11
hsa-mir-155	10	4	27	11
hsa-mir-16-2*	10	9	13	8
hsa-mir-450a	10	5	20	21
hsa-mir-654-3p	10	6	17	17
hsa-mir-651	9	4	34	21
hsa-mir-223*	9	8	24	24
hsa-mir-516b	7	12	14	9
hsa-mir-664	7	6	19	10
hsa-mir-301a	5	4	17	10
hsa-mir-1306_new_star	4	2	13	16
hsa-mir-33a*	4	1	16	6
hsa-mir-486-3p	4	4	15	10
hsa-mir-1254	4	2	50	54
hsa-mir-450a_new_star	4	1	15	9
hsa-mir-551a	0	0	24	15
The list shows 325 miRNA s with at least 10 sequence reads in at least one technical replicate of one species (Human or Chimpanzee).
a Abbreviations:
CX_Hu1 : human prefrontal cortex pool1; CX_Hu2 : technical replicate of human prefrontal cortex pool1
CX_Ch1 : chimpanzee prefrontal cortex pool1; CX_Ch2 : technical replicate of chimpanzee prefrontal cortex pool1
