# Supplementary material for: MicroRNA Expression and Regulation in Human, Chimpanzee, and Macaque Brains
Source: PLoS Genet. 2011 Oct 13;7(10):e1002327. doi: 10.1371/journal.pgen.1002327 (PMC3192836; doi:10.1371/journal.pgen.1002327)
Supplement: Table S7 — This table contains protein expression levels measured in the prefrontal cortex of four humans and four chimpanzees. (XLS) [file pgen.1002327.s015.xls]

## Sheet: first_all.noredundant.nonOverla
Table S7. Protein expression levels in prefrontal cortex of four humans and four chimpanzees
IPI	SWISS-PROT	TREMBL	ENSEMBL	REFSEQ	H-INV	VEGA	C1_1 *	C1_2	C2_1	C2_2	C3_1	C3_2	C4_1	C4_2	H1_1	H1_2	H2_1	H2_2	H3_1	H3_2	H4_1	H4_2
IPI00300585	Q9HB90		ENSP00000270814	NP_071440	HIT000037625	OTTHUMP00000000548	0	0	0	0	2	0	1	2	0	0	0	0	0	0	0	0
IPI00413578		Q5T0D9	ENSP00000349032	NP_877429	HIT000021282	OTTHUMP00000000660	2	0	0	0	1	1	2	1	4	4	8	1	0	0	2	0
IPI00515131		Q5T2W6	ENSP00000368626			OTTHUMP00000000807	0	0	0	0	0	0	0	0	0	0	0	0	0	0	0	1
IPI00018946	Q9NVE7	Q7RTX2	ENSP00000288738	NP_060686	HIT000004118	OTTHUMP00000000865	1	0	1	0	0	0	0	1	4	3	2	2	0	0	0	0
IPI00514936		Q5T2W7	ENSP00000368629			OTTHUMP00000000897	0	0	0	0	0	0	0	0	1	0	0	0	0	0	0	0
IPI00026268	P62873	Q1RMY8	ENSP00000263750	NP_002065	HIT000321048	OTTHUMP00000001107	209	150	193	142	176	199	138	168	123	117	158	159	108	127	142	114
IPI00219153	P35268	Q6IBD1	ENSP00000346088	NP_000974	HIT000259897	OTTHUMP00000001141	3	1	2	2	2	0	3	1	0	1	2	2	1	0	1	0
IPI00298547	Q99497		ENSP00000234912	NP_009193	HIT000297741	OTTHUMP00000001348	66	44	74	54	70	67	46	46	94	94	86	72	81	84	76	82
IPI00549343	Q15836	Q6FGG2	ENSP00000054666	NP_004772	HIT000287243	OTTHUMP00000001361	0	0	0	0	0	0	0	0	0	0	0	0	0	2	0	0
IPI00465248	P06733	Q0JSN2	ENSP00000234590	NP_001419	HIT000270987	OTTHUMP00000001706	349	285	252	173	291	306	353	354	191	219	333	272	195	172	217	188
IPI00515090		Q5SWJ3	ENSP00000366406			OTTHUMP00000001732	0	0	0	0	0	0	0	0	0	0	0	0	1	0	0	0
IPI00152900		Q8WZA0	ENSP00000294431	NP_115744	HIT000059826	OTTHUMP00000001733	0	0	0	0	0	0	0	1	1	1	0	4	1	0	0	0
IPI00219525	P52209	Q4VXH6	ENSP00000270776	NP_002622	HIT000029558	OTTHUMP00000001897	18	10	19	10	13	15	13	10	25	15	21	25	25	24	25	19
IPI00025346	O75381		ENSP00000270774	NP_004556	HIT000032760	OTTHUMP00000001902	1	1	0	0	0	0	0	0	0	0	0	0	0	0	0	0
IPI00007087	Q9UK22	Q5TGY0	ENSP00000235299	NP_036300	HIT000039851	OTTHUMP00000002066	15	10	11	8	10	11	11	4	18	18	15	18	13	8	13	7
IPI00292020	P19623	Q5TER2	ENSP00000235287	NP_003123	HIT000269401	OTTHUMP00000002170	0	0	0	0	0	0	0	0	0	0	0	1	0	0	0	0
IPI00025815	Q13148	Q0JUL7	ENSP00000240185	NP_031401	HIT000264482	OTTHUMP00000002171	0	0	1	0	1	0	0	1	0	0	3	1	0	0	0	0
IPI00294911	P21912	Q0QEY7	ENSP00000235768	NP_002991	HIT000033484	OTTHUMP00000002396	5	2	7	4	4	4	6	2	7	4	5	8	2	0	2	1
IPI00294187	Q9Y2J8		ENSP00000245530	NP_031391	HIT000000711	OTTHUMP00000002403	7	4	10	2	12	12	19	24	10	10	14	14	28	31	44	25
IPI00180121	P51797	Q17R81	ENSP00000234487	NP_001277	HIT000042195	OTTHUMP00000002410	0	0	0	0	0	0	0	0	1	0	2	0	0	0	0	0
IPI00301255	Q96ID5		ENSP00000251296	NP_116269	HIT000082351	OTTHUMP00000002532	2	0	0	1	3	5	3	2	1	1	4	3	0	1	1	0
IPI00305978	O43488		ENSP00000235835	NP_003680	HIT000033168	OTTHUMP00000002622	0	0	1	0	2	3	0	3	1	4	4	2	0	1	0	0
IPI00293721	O95154		ENSP00000062030	NP_036199	HIT000063614	OTTHUMP00000002623	4	2	2	1	2	3	1	1	1	1	0	0	0	0	0	0
IPI00024284	P98160	Q2VPA1	ENSP00000270945	NP_005520	HIT000196616	OTTHUMP00000002765	12	2	2	1	12	12	5	3	3	2	1	4	0	0	1	0
IPI00062298	Q5TGZ0		ENSP00000325562	NP_001027535	HIT000019173	OTTHUMP00000002794	0	0	0	0	0	0	0	0	1	0	0	1	0	0	0	0
IPI00514035		Q5SVN0	ENSP00000364073			OTTHUMP00000002796	0	0	0	0	0	0	1	0	0	0	0	0	0	0	0	0
IPI00016786	P60953		ENSP00000337669	NP_001034891	HIT000038320	OTTHUMP00000002834	6	1	0	1	6	5	9	6	8	7	8	8	11	9	14	12
IPI00070070		Q5TIE3	ENSP00000364220			OTTHUMP00000002878	0	0	0	0	0	0	0	0	0	1	1	0	0	0	0	0
IPI00297084	P39656	Q5VWA5	ENSP00000235894	NP_005207	HIT000042202	OTTHUMP00000002882	0	0	0	0	1	0	0	1	0	0	0	0	0	0	0	0
IPI00007189	P60953	Q9UJM1	ENSP00000251252	NP_426359		OTTHUMP00000002926		0	0	0	0	0	0	0	1	0	0	1	0	0	0	0	2
IPI00471970		Q5VT98	ENSP00000331921			OTTHUMP00000002951	0	0	0	0	0	0	0	0	0	0	0	1	0	0	0	0
IPI00419916	P05186	O75090	ENSP00000343937	NP_000469	HIT000039191	OTTHUMP00000002971	0	0	0	0	0	0	0	0	0	0	0	1	0	0	0	0
IPI00015351		Q9GZP4	ENSP00000246151	NP_065095	HIT000002459	OTTHUMP00000002997	4	2	1	0	1	2	0	0	7	5	4	1	2	3	1	0
IPI00396383		Q6PCB0	ENSP00000315092	NP_073745	HIT000082401	OTTHUMP00000003018	0	0	0	0	1	0	0	0	0	0	0	0	0	0	0	0
IPI00012074	O43390	Q0VGD6	ENSP00000304405	NP_005817	HIT000061569	OTTHUMP00000003258	3	0	1	0	4	2	4	0	3	2	4	1	0	1	1	1
IPI00252950		Q5T1S8	ENSP00000328695	NP_001010980	HIT000044392	OTTHUMP00000003372	0	0	0	1	0	0	0	0	0	0	0	0	0	0	0	0
IPI00001960	Q9Y696	Q5VSX5	ENSP00000306292	NP_039234	HIT000024586	OTTHUMP00000003380	0	0	1	0	0	1	2	0	0	0	2	4	13	12	20	18
IPI00166125	Q8N0Z8	Q5TA41	ENSP00000303329	NP_699170	HIT000082327	OTTHUMP00000003420	0	1	0	0	0	0	0	0	0	0	0	0	0	0	0	0
IPI00472164	Q9Y6W5	Q8NBU0	ENSP00000289115	NP_008921	HIT000052463	OTTHUMP00000003471	0	0	0	0	0	0	0	0	0	0	0	0	0	1	1	2
IPI00170935	Q8N1G4		ENSP00000367498	NP_065761	HIT000041276	OTTHUMP00000003589	7	6	5	4	7	4	9	16	12	12	13	5	4	5	3	5
IPI00006014	O60308		ENSP00000263739	NP_055519	HIT000000279	OTTHUMP00000003590	0	0	0	0	0	0	1	0	0	0	0	0	0	0	0	0
IPI00017443		Q5T151	ENSP00000363326	NP_060447		OTTHUMP00000003616		0	0	0	1	0	0	0	0	0	0	0	0	0	0	0	1
IPI00553153	Q9UII2	Q5JXL8	ENSP00000253067	NP_057395	HIT000034497	OTTHUMP00000003642	0	0	0	0	0	0	0	0	8	0	0	0	0	0	0	0
IPI00006723	Q96DI7		ENSP00000263694	NP_004805	HIT000081551	OTTHUMP00000003888	2	0	2	0	0	0	0	0	0	1	1	0	0	2	0	0
IPI00219684	P05413	Q6IBD7	ENSP00000241156	NP_004093	HIT000032991	OTTHUMP00000003898	14	8	9	4	21	23	11	13	17	9	6	12	10	14	6	5
IPI00018235	Q9UBV8		ENSP00000257133	NP_036524	HIT000003894	OTTHUMP00000003953	0	0	0	0	0	0	0	0	0	1	1	0	0	1	1	1
IPI00005563	Q9GZM7		ENSP00000271064	NP_071447	HIT000082433	OTTHUMP00000003956	1	0	0	0	2	1	0	0	1	0	0	0	0	0	2	0
IPI00007074	P54577		ENSP00000257116	NP_003671	HIT000045086	OTTHUMP00000004027	8	5	3	3	7	5	4	5	4	4	7	3	5	1	3	0
IPI00219103	P84074	Q5U068	ENSP00000241313	NP_002134	HIT000030642	OTTHUMP00000004138	4	1	3	1	13	9	7	1	12	7	9	2	0	0	0	0
IPI00219434	O95886		ENSP00000235180	XP_035601	HIT000070783	OTTHUMP00000004180	3	0	0	1	0	1	3	0	2	2	2	2	0	0	0	0
IPI00646056	Q8IXK0		ENSP00000257118	NP_932157	HIT000247694	OTTHUMP00000004292	0	0	0	0	0	0	0	0	0	0	1	0	0	0	0	0
IPI00010740	P23246	Q5SZ71	ENSP00000263532	NP_005057	HIT000323115	OTTHUMP00000004329	8	2	6	2	11	6	6	10	1	5	8	8	10	4	6	4
IPI00026697	O95789	Q32Q23	ENSP00000349708			OTTHUMP00000004335	0	0	0	2	0	0	0	0	0	0	0	0	0	0	0	0
IPI00028006	P49721	Q9BWZ9	ENSP00000246311	NP_002785	HIT000278623	OTTHUMP00000004345	1	1	2	1	2	2	3	2	2	1	1	4	0	0	0	1
IPI00374479	O14645	Q5HYE2	ENSP00000296218	NP_003453	HIT000061829	OTTHUMP00000004400	0	0	0	0	0	0	0	0	0	0	0	0	1	0	0	0
IPI00550746	Q9Y266	Q0JTN3	ENSP00000247950	NP_006591	HIT000292013	OTTHUMP00000004405	4	1	5	4	8	6	8	1	3	2	2	0	0	0	0	0
IPI00020060	P19634	Q5VU07	ENSP00000263980	NP_003038	HIT000216256	OTTHUMP00000004468	4	1	4	2	4	5	0	0	2	0	2	2	0	0	0	0
IPI00303099	Q53HL2		ENSP00000316121	NP_060571	HIT000003804	OTTHUMP00000004514	0	0	0	0	1	0	0	0	0	0	0	0	0	0	0	0
IPI00470779	P40222	Q0JSQ1	ENSP00000345266	NP_787048	HIT000081114	OTTHUMP00000004649	0	0	0	0	0	1	0	0	0	0	0	0	0	0	0	0
IPI00008274	Q01518		ENSP00000344832	NP_006358	HIT000192150	OTTHUMP00000004820	8	9	8	6	14	11	11	9	6	10	7	13	11	12	8	11
IPI00639931		Q5T0S2	ENSP00000361883			OTTHUMP00000004823	1	0	0	0	0	0	1	0	0	1	0	0	0	1	0	0
IPI00290142	P17812		ENSP00000341016	NP_001896	HIT000321727	OTTHUMP00000006322	4	2	2	2	4	4	0	0	2	4	2	1	0	0	0	0
IPI00027180	O75844		ENSP00000196805	NP_005848	HIT000082042	OTTHUMP00000006394	0	0	0	0	1	1	0	0	0	0	0	0	1	0	0	0
IPI00018294	Q13129	Q14CQ1	ENSP00000235647	NP_036553	HIT000218677	OTTHUMP00000006395	0	0	0	0	0	1	0	0	0	0	0	0	0	0	0	0
IPI00513821		Q5QPL4	ENSP00000235657			OTTHUMP00000008380	0	1	0	0	0	0	0	0	0	0	0	0	0	0	0	0
IPI00012795	Q13347	Q53HU7	ENSP00000197492	NP_003748	HIT000301875	OTTHUMP00000008492	3	1	5	0	0	2	1	1	2	1	0	0	0	0	2	0
IPI00470480		Q63HP1	ENSP00000363426		HIT000056568	OTTHUMP00000008511	1	0	0	0	0	0	0	0	0	0	0	0	1	0	0	0
IPI00479997	P16949	Q96CE4	ENSP00000236291	NP_005554	HIT000191296	OTTHUMP00000008527	2	3	6	1	7	2	3	1	22	21	17	15	7	10	9	8
IPI00006094	Q9UJD0		ENSP00000235663	NP_055562	HIT000298428	OTTHUMP00000008622	0	0	1	0	0	0	1	0	4	3	1	1	1	0	0	0
IPI00220063	O43920	Q6IBA0	ENSP00000302837	NP_004543	HIT000001734	OTTHUMP00000008670	6	3	4	0	4	4	5	4	4	7	4	7	5	2	1	0
IPI00016384		Q8TAY7	ENSP00000348723	NP_079145	HIT000007386	OTTHUMP00000008763	0	0	0	0	0	0	0	0	0	0	0	0	0	0	0	2
IPI00398709		Q5VY71	ENSP00000341006	NP_937770		OTTHUMP00000008765		0	0	0	0	0	0	0	0	0	0	0	0	0	0	0	1
IPI00005666	O75164		ENSP00000262914	NP_055478	HIT000000402	OTTHUMP00000008810	0	0	0	0	0	0	0	0	0	0	0	0	1	0	0	0
IPI00641181	P49006	Q0JSY2	ENSP00000310885	NP_075385	HIT000276169	OTTHUMP00000008870	0	1	0	0	4	3	2	0	1	2	3	1	1	4	1	3
IPI00220194	P11166	Q0P512	ENSP00000270929	NP_006507	HIT000191415	OTTHUMP00000009006	3	2	2	3	4	2	1	2	4	5	1	0	0	0	1	0
IPI00654605		Q3KQU3	ENSP00000362243	NP_060537		OTTHUMP00000009183		0	0	1	0	0	0	0	2	0	1	3	1	1	0	1	12
IPI00000874	Q06830		ENSP00000262746	NP_002565	HIT000050320	OTTHUMP00000009234	19	8	18	8	16	13	15	10	6	15	10	11	21	23	28	24
IPI00220271	P14550	Q6IAZ4	ENSP00000262749	NP_006057	HIT000029823	OTTHUMP00000009240	10	4	8	0	1	3	6	9	7	9	6	4	4	6	8	4
IPI00432363	Q96PK2	Q5VW21	ENSP00000353231	NP_149033	HIT000077229	OTTHUMP00000009303	0	1	0	0	0	0	0	0	0	0	0	0	0	0	0	0
IPI00012107	O00519	Q52M86	ENSP00000236138	NP_001432	HIT000221769	OTTHUMP00000009480	0	0	0	0	1	0	0	0	0	0	0	0	0	0	0	0
IPI00296022	P07919	Q567R0	ENSP00000309565	NP_005995	HIT000305141	OTTHUMP00000009481	9	6	7	4	15	14	20	8	7	10	6	5	7	3	4	3
IPI00219953	P30085		ENSP00000294340	NP_057392	HIT000065685	OTTHUMP00000009565	12	12	10	10	18	20	18	8	17	13	26	25	11	9	7	7
IPI00168061	Q8NAP8	Q15DG5	ENSP00000291374	XP_001126579	HIT000017193	OTTHUMP00000009578	0	0	0	0	0	0	0	0	1	0	0	0	0	0	0	0
IPI00104050	Q9Y2W1	Q6P0P7	ENSP00000264293	NP_005110	HIT000070118	OTTHUMP00000009597	1	0	0	0	0	1	0	1	0	0	0	0	0	0	0	0
IPI00299501		Q2M3M2	ENSP00000236495	NP_001011547	HIT000057196	OTTHUMP00000009658	0	1	0	0	0	0	0	0	0	0	0	0	0	0	0	0
IPI00302673		Q5SXB7	ENSP00000262750	NP_073582	HIT000264551	OTTHUMP00000009681	0	0	1	0	0	1	0	0	2	6	2	2	0	0	0	0
IPI00021453	O14495	Q5U0F7	ENSP00000294390	NP_003704	HIT000080457	OTTHUMP00000009855	1	0	0	0	0	0	0	0	0	0	0	0	0	0	0	0
IPI00464950		Q5VWT5	ENSP00000345972	NP_001004303	HIT000057086	OTTHUMP00000009991	0	0	0	1	0	0	0	0	0	0	0	0	0	0	0	0
IPI00644030						OTTHUMP00000010110	0	0	0	0	0	0	0	0	0	0	0	0	1	0	0	0
IPI00216587	P62241	Q5JR94	ENSP00000271105	NP_001003	HIT000264374	OTTHUMP00000010160	0	0	0	0	0	1	0	0	0	0	0	0	0	0	0	0
IPI00456642	Q5T447		ENSP00000262747	NP_078878	HIT000021317	OTTHUMP00000010267	0	0	0	0	0	0	0	0	0	0	1	0	0	0	0	0
IPI00300562	P20337	Q5VUL2	ENSP00000304461	NP_002858	HIT000032174	OTTHUMP00000010299	0	0	1	0	0	1	2	3	0	1	0	0	0	0	0	0
IPI00026328	O95881		ENSP00000236524	NP_056997	HIT000012783	OTTHUMP00000010300	0	0	0	0	1	0	0	0	0	0	1	0	0	0	0	0
IPI00253050		Q5T7N2	ENSP00000294615	NP_061952	HIT000260110	OTTHUMP00000010477	0	1	0	0	0	0	0	0	0	0	0	0	0	0	0	0
IPI00012912	P23786	Q53G79	ENSP00000287862	NP_000089	HIT000217930	OTTHUMP00000010493	0	0	0	0	0	0	0	0	1	0	0	0	0	0	0	0
IPI00016568	P27144	Q6IBH4	ENSP00000294419	NP_001002921	HIT000009200	OTTHUMP00000010594	4	5	6	1	7	4	3	5	5	2	5	3	0	0	0	0
IPI00000146	Q9BXI3	Q3SYB9	ENSP00000235628	NP_115915	HIT000077678	OTTHUMP00000010831	0	0	1	0	0	0	0	0	0	0	0	0	0	0	0	0
IPI00008305	Q9UM19	Q0JSP9	ENSP00000235630	NP_057341	HIT000025187	OTTHUMP00000010835	20	20	27	16	30	26	24	20	23	28	29	23	4	5	5	3
IPI00152998	Q9H9A6		ENSP00000183657	NP_060238	HIT000006225	OTTHUMP00000010944	0	0	0	0	0	0	0	0	1	0	0	0	0	0	0	0
IPI00029104	P24522	Q5TCA8	ENSP00000235358	NP_001915	HIT000291914	OTTHUMP00000010979	0	0	0	0	0	1	0	0	0	0	0	0	0	0	0	0
IPI00221232	Q9UBI6	Q53GD1	ENSP00000304013	NP_061329	HIT000027343	OTTHUMP00000011139	2	0	1	0	1	5	2	3	1	2	0	0	1	2	6	6
IPI00021943	O14772	Q53FM8	ENSP00000263417	NP_003829	HIT000062427	OTTHUMP00000011173	0	0	1	0	0	0	0	0	0	0	0	0	0	0	0	0
IPI00000792	Q08257		ENSP00000263416	NP_001880	HIT000274634	OTTHUMP00000011194	11	5	10	9	13	9	10	12	8	6	9	7	2	2	1	0
IPI00398179	P07101	O43816	ENSP00000370567	NP_954987	HIT000325286	OTTHUMP00000011226	0	0	0	0	0	0	0	0	0	0	0	0	0	0	0	1
IPI00176221	Q7Z3B1		ENSP00000350364	NP_776169	HIT000054798	OTTHUMP00000011267	8	9	14	8	20	14	11	16	15	19	15	16	7	6	4	2
IPI00218549	Q8WXJ9	Q4G1B1	ENSP00000284142	NP_543144	HIT000023436	OTTHUMP00000011348	0	0	0	0	0	0	0	0	0	0	0	0	0	1	0	0
IPI00305894	Q8WXI4	Q5VUG1	ENSP00000294369	NP_056362	HIT000000432	OTTHUMP00000011527	0	1	0	0	0	0	0	0	0	0	0	0	0	0	0	0
IPI00290410		Q12987	ENSP00000183866	NP_055412	HIT000251917	OTTHUMP00000011922	0	0	0	0	0	0	0	0	0	0	0	0	0	1	0	0
IPI00298902		Q8N3X7	ENSP00000176186		HIT000000824	OTTHUMP00000011946	0	0	1	0	1	1	1	1	1	0	4	0	0	0	0	0
IPI00220342	O94760	Q5HYC8	ENSP00000284031	NP_036269	HIT000041899	OTTHUMP00000012304	35	28	35	25	42	43	54	47	56	51	49	55	43	51	54	47
IPI00642206		Q5T9S5	ENSP00000343377			OTTHUMP00000012325	0	0	2	0	0	0	0	1	0	0	0	0	0	0	0	0
IPI00168920		Q17RW2	ENSP00000304470	NP_690850	HIT000251179	OTTHUMP00000012370	0	1	0	0	0	0	0	0	0	0	0	0	0	0	0	0
IPI00216682	Q15417	Q6FHA7	ENSP00000281863	NP_001830	HIT000039910	OTTHUMP00000012470	0	0	1	0	3	1	1	1	4	3	3	2	5	7	3	2
IPI00000494	P46777	Q32LZ3	ENSP00000313819	NP_000960	HIT000291718	OTTHUMP00000012584	2	1	2	1	5	2	5	0	2	2	3	3	0	0	0	0
IPI00003944	P11182	Q5VVL8	ENSP00000260559	NP_001909	HIT000322842	OTTHUMP00000012596	2	0	0	0	1	1	2	1	4	4	3	6	3	2	2	0
IPI00297626	O00186	Q53FW1	ENSP00000264125	NP_009200	HIT000101683	OTTHUMP00000012823	1	0	0	0	0	0	0	3	2	5	1	1	0	1	3	2
IPI00514311	Q9P2B4	Q0JS68	ENSP00000271277	NP_061174	HIT000037455	OTTHUMP00000012854	0	0	0	0	0	1	0	0	0	1	0	0	0	0	0	0
IPI00514779		Q5T1N1	ENSP00000359015	NP_689976	HIT000027128	OTTHUMP00000012937	0	0	0	0	0	0	0	0	0	0	0	0	0	0	1	0
IPI00012831	O43504	Q6IBD8	ENSP00000256644	NP_006393	HIT000260529	OTTHUMP00000013288	0	0	0	2	0	0	1	1	0	1	2	0	0	1	1	0
IPI00218831	P09488	Q16041	ENSP00000311469	NP_000552	HIT000321296	OTTHUMP00000013346	0	1	0	0	0	1	1	0	0	0	2	4	0	0	2	1
IPI00219067	P28161	Q2M318	ENSP00000241337	NP_000839		OTTHUMP00000013351		0	0	0	0	0	0	0	1	11	11	29	21	7	8	8	102
IPI00246975	P21266	Q59EJ5	ENSP00000256594	NP_000840	HIT000293699	OTTHUMP00000013355	28	14	5	6	7	15	22	18	30	47	38	38	39	39	18	20
IPI00642432		Q5T8R1	ENSP00000358827			OTTHUMP00000013361	0	0	0	0	0	0	0	0	0	0	0	0	0	1	0	0
IPI00220578	P08754	Q5TZX1	ENSP00000251336	NP_006487	HIT000195175	OTTHUMP00000013368	0	0	0	0	0	0	0	0	0	0	0	0	0	1	2	1
IPI00182938	O43865	Q2NKW8	ENSP00000310774	NP_006612	HIT000077152	OTTHUMP00000013376	0	0	3	0	1	1	0	0	3	1	0	2	0	0	0	0
IPI00220637	P49591	Q0VGA5	ENSP00000234677	NP_006504	HIT000285418	OTTHUMP00000013432	0	0	0	0	0	1	2	0	6	7	8	8	4	5	1	4
IPI00029133	P24539	Q53GB3	ENSP00000235094	NP_001679	HIT000293409	OTTHUMP00000013469	30	32	22	16	30	28	21	16	26	23	33	31	12	15	17	21
IPI00335355	Q9H1V8		ENSP00000264132	NP_001010898		OTTHUMP00000013508		8	3	9	2	12	9	9	13	8	17	12	9	1	0	1	116
IPI00005969	P52907		ENSP00000263168	NP_006126	HIT000057385	OTTHUMP00000013512	4	0	3	0	2	2	2	3	3	2	6	3	2	2	2	3
IPI00019345	P62834	Q5QPH6	ENSP00000348786	NP_001010935	HIT000194870	OTTHUMP00000013740	3	0	0	0	2	2	0	0	0	0	3	0	3	1	6	1
IPI00291922	P28066	Q3T1C1	ENSP00000271308	NP_002781	HIT000279617	OTTHUMP00000013792	3	0	1	0	1	1	1	0	2	4	2	2	0	1	2	0
IPI00015346	Q9HCU4	Q5T2Y7	ENSP00000271332	NP_001399	HIT000074716	OTTHUMP00000013794	0	0	0	0	1	1	2	2	0	0	1	0	0	0	0	1
IPI00022048	Q9P2B2	Q1WWL2	ENSP00000256643	NP_065173	HIT000001151	OTTHUMP00000013816	0	0	0	0	0	1	2	2	0	0	1	0	0	0	0	0
IPI00216137	Q15431	Q5VT04	ENSP00000355125	NP_003167	HIT000324920	OTTHUMP00000013876	0	0	0	0	0	1	0	0	0	0	0	0	0	0	0	0
IPI00000005	P01111	Q5U091	ENSP00000261444	NP_002515		OTTHUMP00000013879		0	0	0	0	0	1	0	0	0	0	0	0	0	0	0	1
IPI00470891	O75534	Q0JSM2	ENSP00000358545	NP_001007554	HIT000000602	OTTHUMP00000013881	2	2	3	0	6	8	5	3	1	8	6	3	0	0	1	0
IPI00453473	P62805	Q0VAS5	ENSP00000244484	NP_001029249	HIT000035123	OTTHUMP00000013906	4	1	4	1	8	13	4	4	6	6	7	6	3	2	8	8
IPI00011200	O43175		ENSP00000263167	NP_006614	HIT000035203	OTTHUMP00000013926	16	3	5	4	22	21	29	26	12	14	19	20	23	33	46	33
IPI00006482	P05023		ENSP00000295598	NP_000692	HIT000031408	OTTHUMP00000013935	111	75	64	52	102	96	72	77	122	124	190	130	68	72	93	80
IPI00026256	P20930		ENSP00000357789	NP_002007		OTTHUMP00000014057		0	0	0	0	0	0	0	0	0	0	0	0	1	0	0	1
IPI00017339	Q15427	Q53FG6	ENSP00000271628	NP_005841	HIT000299554	OTTHUMP00000014064	0	0	1	0	0	0	0	0	0	0	0	0	0	0	0	0
IPI00644025	Q7L0J3	Q0JSQ9	ENSP00000290269	NP_055664	HIT000093343	OTTHUMP00000014065	27	18	24	17	26	28	27	26	35	22	33	27	11	11	6	15
IPI00045531	Q96S90		ENSP00000295310	NP_997716	HIT000056558	OTTHUMP00000014153	0	0	0	0	1	0	0	0	0	1	0	0	0	0	0	0
IPI00022694	P55036	Q5VWC5	ENSP00000290517	NP_002801	HIT000218749	OTTHUMP00000014286	0	0	0	0	0	0	0	0	1	0	1	0	1	0	0	0
IPI00555956	P28070	Q5SZS5	ENSP00000290541	NP_002787	HIT000038030	OTTHUMP00000014463	0	0	0	0	1	0	0	0	1	0	1	1	0	0	0	0
IPI00090327	Q9NRW7	Q53FR8	ENSP00000259149	NP_009190	HIT000050947	OTTHUMP00000014482	2	1	0	0	1	0	0	0	2	1	3	1	0	0	0	0
IPI00514704		Q5QP02				OTTHUMP00000014487		0	0	1	0	0	0	0	0	0	0	0	0	0	0	0	1
IPI00032147	O95670	Q2L6F8	ENSP00000302194	NP_569730		OTTHUMP00000014642		12	1	6	2	12	10	6	13	10	18	12	8	5	4	2	122
IPI00011654	P07437	Q5SU16	ENSP00000259925	NP_821133	HIT000033326	OTTHUMP00000014646	61	41	45	41	62	71	72	88	49	66	65	61	43	44	69	61
IPI00641161		Q5SSY4				OTTHUMP00000014671		1	1	0	1	1	3	0	1	2	3	3	2	1	1	3	24
IPI00000760	O95865		ENSP00000229707	NP_039268	HIT000001782	OTTHUMP00000014675	1	0	0	0	2	3	1	0	2	0	3	0	2	6	3	2
IPI00002756	Q9UBS5	Q5SUL3	ENSP00000366197	NP_001461	HIT000244997	OTTHUMP00000014748	7	4	5	6	4	7	4	2	6	9	8	5	0	0	0	1
IPI00556079	Q16653	Q5JNY2	ENSP00000373017		HIT000220850	OTTHUMP00000014785	25	12	14	9	29	34	48	49	26	27	30	31	94	88	121	98
IPI00030355	O60927		ENSP00000230260	NP_068778		OTTHUMP00000014802		0	0	1	3	1	2	0	1	0	0	0	0	2	3	3	18
IPI00022316	Q9Y676	Q5STZ1	ENSP00000259873	NP_054765	HIT000001964	OTTHUMP00000014833	0	0	0	0	0	0	0	0	1	0	0	0	0	0	0	0
IPI00032460	Q9Y333	Q6FGG1	ENSP00000229715	NP_067000	HIT000245874	OTTHUMP00000014843	0	0	0	0	1	0	1	0	0	0	0	0	0	0	0	1
IPI00641330	Q06587		ENSP00000363784	NP_002922	HIT000031291	OTTHUMP00000014874	0	0	0	0	0	0	0	0	0	0	0	1	0	0	0	0
IPI00396387		Q96CT5	ENSP00000365792	NP_005266	HIT000050705	OTTHUMP00000014879	2	1	2	2	3	2	3	6	0	3	4	0	2	1	1	0
IPI00027438	O75955	Q53HQ0	ENSP00000259846	NP_005794	HIT000068165	OTTHUMP00000014916	15	12	23	14	18	28	12	13	19	15	10	5	1	0	3	3
IPI00007047	P05109	Q5SY70	ENSP00000271846	NP_002955	HIT000321168	OTTHUMP00000015329	0	0	1	0	1	1	0	0	0	1	0	0	0	0	0	0
IPI00027462	P06702	Q6FGA1	ENSP00000295382	NP_002956	HIT000321167	OTTHUMP00000015331	2	0	2	0	8	6	0	0	0	0	0	0	0	0	0	0
IPI00062120	Q96FQ6	Q5RHS6	ENSP00000340481	NP_525127	HIT000038551	OTTHUMP00000015465	0	0	0	0	1	0	0	0	0	2	1	1	0	0	0	0
IPI00021978	O96011		ENSP00000254088	NP_003837	HIT000058545	OTTHUMP00000015598	2	0	2	0	0	0	0	0	0	2	2	0	0	1	0	0
IPI00018146	P27348	Q0JTC7	ENSP00000238081	NP_006817	HIT000259592	OTTHUMP00000015730	42	28	25	17	46	40	40	36	52	56	64	44	38	36	51	49
IPI00101405	P14324	Q96G29	ENSP00000292252	NP_001995	HIT000277475	OTTHUMP00000015807	0	0	0	0	0	0	0	0	0	1	2	0	0	0	0	0
IPI00013905	O43741		ENSP00000254101	NP_005390	HIT000053939	OTTHUMP00000015910	0	0	1	0	0	0	0	0	0	0	0	0	0	0	0	0
IPI00219129	P16083	Q5TD04	ENSP00000244547	NP_000895	HIT000191096	OTTHUMP00000015948	7	2	1	0	2	4	0	0	1	2	0	0	2	2	2	0
IPI00032139	P50453	Q5TD03	ENSP00000303919	NP_004146	HIT000059827	OTTHUMP00000015954	0	0	0	0	2	2	0	1	0	0	0	2	0	0	0	0
IPI00013475		Q13885	ENSP00000259799	NP_001060	HIT000289258	OTTHUMP00000015956	23	17	13	9	59	50	41	36	30	33	39	32	39	43	79	49
IPI00031370		O43209	ENSP00000259818	NP_821080		OTTHUMP00000015964		4	2	1	2	5	4	0	1	0	1	7	3	2	2	2	38
IPI00217605	Q8IXS0		ENSP00000274673	NP_775834	HIT000052197	OTTHUMP00000015980	0	0	0	0	0	0	0	0	0	0	0	0	0	0	1	0
IPI00470625		Q7Z4Y1	ENSP00000244766	NP_057672	HIT000299506	OTTHUMP00000015989	1	0	4	2	5	3	3	3	4	5	2	2	0	1	1	0
IPI00003588	O43324		ENSP00000264871	NP_004271	HIT000032350	OTTHUMP00000016008	0	0	0	0	0	1	0	0	0	0	0	0	0	0	0	0
IPI00009346	Q9P0S9	Q53F27	ENSP00000229563	NP_057546	HIT000300984	OTTHUMP00000016019	0	0	0	0	0	0	0	0	2	0	0	1	0	0	0	0
IPI00025489	P20794	Q547D0	ENSP00000313021	NP_005897	HIT000080984	OTTHUMP00000016025	0	0	0	0	0	1	0	2	1	0	0	0	0	0	0	0
IPI00783879	P15822	Q5MPB1	ENSP00000324040	NP_002105	HIT000321648	OTTHUMP00000016036	0	0	0	0	0	0	1	0	0	1	0	0	0	0	0	0
IPI00514862		Q5R356	ENSP00000368652			OTTHUMP00000016046	0	0	0	0	0	0	0	0	0	0	0	0	0	1	0	0
IPI00023756	Q92833	Q86X63	ENSP00000341280	NP_004964	HIT000098346	OTTHUMP00000016058	0	0	0	0	0	0	1	0	0	0	0	0	0	0	0	0
IPI00027342	P40123	Q9BYW9	ENSP00000229922	NP_006357	HIT000033819	OTTHUMP00000016069	6	2	7	2	11	14	7	8	14	13	15	8	6	8	4	7
IPI00020021	P35659		ENSP00000244776	NP_003463	HIT000051357	OTTHUMP00000016078	1	0	0	2	0	0	0	0	0	0	0	0	0	0	0	0
IPI00020530	Q9NPJ3		ENSP00000230048	NP_060943	HIT000002030	OTTHUMP00000016090	3	1	0	2	3	2	3	6	5	8	3	3	0	0	0	0
IPI00014757		Q3MIV1	ENSP00000345716	NP_001007532	HIT000095149	OTTHUMP00000016201	0	0	0	0	0	0	0	0	0	0	0	1	0	0	0	0
IPI00009148	O95989		ENSP00000266006	NP_006694	HIT000033406	OTTHUMP00000016227	0	0	1	0	1	1	3	0	2	0	0	0	0	1	0	0
IPI00011515	Q9BY11	Q5TZC3	ENSP00000244458	NP_065855	HIT000028941	OTTHUMP00000016231	120	76	120	62	91	101	90	128	93	98	98	52	47	69	57	33
IPI00395663	Q92625		ENSP00000353518	NP_056060	HIT000042364	OTTHUMP00000016243	0	1	0	0	0	0	0	0	0	0	0	0	0	0	0	0
IPI00004924		Q86VF4	ENSP00000319831	NP_071330	HIT000086894	OTTHUMP00000016251	0	0	0	0	0	0	0	0	0	0	0	0	1	0	1	0
IPI00030252	Q9HB96		ENSP00000229769	NP_068741	HIT000075540	OTTHUMP00000016254	1	0	0	0	0	0	0	0	0	0	0	0	0	0	0	0
IPI00030532	Q9HCH3	Q658T3	ENSP00000244751	NP_065990	HIT000001314	OTTHUMP00000016296	4	1	3	1	1	4	0	0	0	1	1	0	0	0	0	0
IPI00301143		Q6UXB8	ENSP00000297048	NP_699201	HIT000044462	OTTHUMP00000016309	2	0	0	0	0	0	0	0	0	0	0	0	0	0	0	0
IPI00007019	Q9Y3C6	Q5TDC9	ENSP00000244367	NP_057143	HIT000253076	OTTHUMP00000016310	0	0	0	0	0	2	1	0	0	1	2	0	1	0	2	2
IPI00220766	Q04760	Q59EL0	ENSP00000244746	NP_006699	HIT000100492	OTTHUMP00000016339	18	8	10	11	13	23	6	3	6	10	10	13	15	11	18	16
IPI00008107	Q9ULH4		ENSP00000345985	NP_065788	HIT000000962	OTTHUMP00000016361	0	0	0	0	0	1	0	0	0	0	0	0	0	0	0	0
IPI00551062		Q0P6I2	ENSP00000323469	NP_006577	HIT000044069	OTTHUMP00000016408	0	0	0	0	1	2	0	0	0	0	0	0	0	0	0	0
IPI00157176	Q16626		ENSP00000244711	NP_055438	HIT000030627	OTTHUMP00000016417	0	0	0	0	0	0	0	0	0	0	1	0	0	0	0	0
IPI00007926	O43598		ENSP00000230431	NP_006434	HIT000063516	OTTHUMP00000016424	2	1	0	0	0	1	0	0	0	0	3	2	0	0	0	1
IPI00414676	P08238	Q6PK50	ENSP00000325875	NP_031381	HIT000253179	OTTHUMP00000016517	39	35	41	30	67	73	56	53	42	51	56	58	33	38	43	37
IPI00011588	Q13093	Q5VTT1	ENSP00000274793	NP_005075	HIT000218544	OTTHUMP00000016555	0	1	0	0	0	0	0	0	0	0	0	0	0	0	0	0
IPI00217998	Q8IZF3		ENSP00000283303		HIT000084723	OTTHUMP00000016564	0	0	0	0	0	0	0	1	0	0	0	0	0	0	0	0
IPI00024934	P22033	Q59HB4	ENSP00000274813	NP_000246	HIT000196163	OTTHUMP00000016578	0	0	0	0	2	0	1	1	0	2	1	0	0	0	0	0
IPI00013214	P25205	Q53HJ4	ENSP00000229854	NP_002379	HIT000030527	OTTHUMP00000016600	0	0	0	0	0	0	1	0	0	0	0	0	0	0	0	0
IPI00479237	Q8TEZ7		ENSP00000353953	NP_588608	HIT000254540	OTTHUMP00000016604	0	0	1	0	0	0	0	0	0	0	0	0	0	0	0	0
IPI00074148		Q5TBT1	ENSP00000307959	NP_899236		OTTHUMP00000016653		1	0	3	0	5	2	2	0	2	1	4	5	1	2	2	30
IPI00008034	Q9ULC3	Q68DJ6	ENSP00000320413	NP_057361	HIT000306408	OTTHUMP00000016667	0	0	0	0	0	0	0	0	0	1	0	0	0	0	0	0
IPI00020164	Q93096		ENSP00000229983	NP_003454	HIT000306486	OTTHUMP00000016675	0	0	0	0	2	2	0	0	0	1	0	0	0	0	0	0
IPI00103105	Q5VUM1		ENSP00000284225	NP_660310		OTTHUMP00000016704		0	0	0	0	1	0	0	0	0	0	0	0	0	0	0	1
IPI00385437		Q2TAC1	ENSP00000238928	NP_078852	HIT000050713	OTTHUMP00000016711	0	0	0	0	0	0	0	0	0	0	0	0	0	0	1	0
IPI00026570	P14406	Q3MIH5	ENSP00000230459	NP_001856	HIT000289311	OTTHUMP00000016749	4	7	6	5	14	6	7	9	8	6	2	8	1	6	8	2
IPI00019381	Q9NV96		ENSP00000323733	NP_060717	HIT000027727	OTTHUMP00000016751	3	4	6	4	2	4	5	7	4	7	7	1	0	1	2	5
IPI00552641		Q5JVM0	ENSP00000358995			OTTHUMP00000016762	0	0	0	0	0	0	0	0	0	1	0	0	0	0	0	0
IPI00412272	Q9UJC5	Q2VPC2	ENSP00000349549	NP_113657	HIT000077992	OTTHUMP00000016775	11	4	6	3	9	11	7	6	3	5	5	7	2	7	4	3
IPI00009295	Q9GZR5		ENSP00000237167	NP_073563	HIT000083551	OTTHUMP00000016776	0	0	0	0	1	0	0	0	0	0	0	0	0	0	0	0
IPI00151170	P33981	Q15272	ENSP00000230510	NP_003309	HIT000029791	OTTHUMP00000016777	0	0	0	0	0	0	0	1	0	0	0	0	0	0	0	0
IPI00165979		Q2QKU3	ENSP00000305721	NP_056340	HIT000001132	OTTHUMP00000016784	0	0	0	0	0	0	0	0	0	1	0	0	0	0	0	0
IPI00009111	Q13641		ENSP00000275030	NP_006661	HIT000051855	OTTHUMP00000016786	1	0	0	0	0	0	0	0	2	2	2	2	0	0	0	0
IPI00008215	P48163	Q8WVX2	ENSP00000265285	NP_002386	HIT000280909	OTTHUMP00000016792	10	3	8	4	8	9	7	5	11	13	25	15	2	3	4	3
IPI00006612	O60641		ENSP00000195649	NP_055656	HIT000000381	OTTHUMP00000016794	53	29	76	39	67	65	49	50	56	59	60	57	17	19	25	17
IPI00062203	Q96G30		ENSP00000257776	NP_612418	HIT000015642	OTTHUMP00000016804	0	0	0	1	0	0	0	0	0	0	0	0	0	0	0	0
IPI00007122		Q5TB80	ENSP00000257766	NP_055710	HIT000000726	OTTHUMP00000016806	1	0	0	0	0	0	0	0	0	0	0	0	0	0	0	0
IPI00164352	O60281	Q3LIB3	ENSP00000342847	XP_048070	HIT000054531	OTTHUMP00000016826	0	0	0	0	0	0	0	0	1	0	0	0	0	0	0	0
IPI00514101		Q5T161	ENSP00000358536			OTTHUMP00000016834	0	0	0	0	0	0	0	0	0	0	0	0	0	0	1	0
IPI00023064	Q9P032		ENSP00000243273	NP_054884	HIT000002076	OTTHUMP00000016882	0	0	0	0	1	0	0	0	2	0	0	0	0	0	0	0
IPI00514008		Q5THS9	ENSP00000358259			OTTHUMP00000016884	0	0	0	0	0	0	0	0	0	0	0	0	0	0	0	1
IPI00418414	Q9NZJ6	Q5T061	ENSP00000254759	NP_059117	HIT000013569	OTTHUMP00000016892	0	1	0	0	0	0	0	0	0	0	2	0	0	0	0	0
IPI00747200	Q9P0P8		ENSP00000310951	NP_057571	HIT000302081	OTTHUMP00000016927	0	0	0	0	0	0	0	0	0	0	0	1	0	1	0	0
IPI00741958		Q5T5X7	ENSP00000340166	XP_166320	HIT000001268	OTTHUMP00000016928	0	0	0	0	1	0	0	0	0	0	0	0	0	0	0	0
IPI00029740	O60493	Q4TT31	ENSP00000331905	NP_003786		OTTHUMP00000016941		2	1	1	1	6	6	10	6	11	5	5	5	4	4	2	69
IPI00374982		Q5T699	ENSP00000357963			OTTHUMP00000016950	0	0	0	0	0	0	1	0	0	0	0	0	0	0	0	0
IPI00643795		Q5TCS5				OTTHUMP00000016979		0	0	0	0	0	0	0	0	0	0	0	1	0	0	0	1
IPI00022007	Q92558	Q5SZK7	ENSP00000352425	NP_001020105	HIT000259093	OTTHUMP00000016990	6	0	7	1	6	4	3	1	6	0	3	1	2	0	0	0
IPI00219301	P29966	Q6NVI1	ENSP00000285456	NP_002347	HIT000100429	OTTHUMP00000017045	58	28	49	21	42	35	56	49	81	69	104	90	52	63	77	62
IPI00289601	Q92769		ENSP00000347104	NP_001518	HIT000219162	OTTHUMP00000017046	1	0	0	0	0	0	0	0	0	0	1	0	0	0	0	0
IPI00166835	Q8N5C1		ENSP00000325894	NP_714922	HIT000018995	OTTHUMP00000017067	0	0	1	0	0	0	0	0	0	0	0	0	0	0	0	0
IPI00337612	Q8N8Z6		ENSP00000296955	NP_775945	HIT000051465	OTTHUMP00000017084	0	0	0	0	0	0	0	0	0	0	0	0	0	0	1	0
IPI00218487	P17302	Q53FJ6	ENSP00000282561	NP_000156	HIT000321810	OTTHUMP00000017111	9	2	10	5	6	3	3	5	8	8	3	5	11	13	9	7
IPI00413817	Q9NRX5		ENSP00000342962	NP_065806	HIT000041768	OTTHUMP00000017112	0	0	0	0	1	0	0	0	0	0	0	0	0	0	0	0
IPI00646640		Q5SYC1	ENSP00000275162	NP_001010852	HIT000020382	OTTHUMP00000017121	2	1	0	0	1	3	2	2	2	0	1	3	1	0	0	0
IPI00170924		Q8N0Y9	ENSP00000229633	NP_612638	HIT000055875	OTTHUMP00000017150	0	0	0	0	0	1	1	0	1	0	3	0	0	0	2	0
IPI00647205		Q5TF21	ENSP00000237296	NP_001012279	HIT000021345	OTTHUMP00000017175	0	0	1	0	4	2	0	0	4	2	2	0	0	0	0	0
IPI00022133		Q5JRN3	ENSP00000257986			OTTHUMP00000017199	0	0	0	0	2	2	0	0	0	0	0	0	0	0	0	0
IPI00013917	P25398	Q76M58	ENSP00000230050	NP_001007	HIT000321838	OTTHUMP00000017230	0	0	0	0	1	2	0	0	0	0	0	0	0	0	0	0
IPI00009070	Q9Y450	Q4VX90	ENSP00000257985	NP_006611	HIT000248086	OTTHUMP00000017252	0	0	0	0	1	0	0	0	1	0	0	1	0	0	0	0
IPI00514897		Q5TH69	ENSP00000356688			OTTHUMP00000017295	0	0	0	0	1	0	0	0	0	0	0	0	0	0	0	0
IPI00644697	Q9Y5Z4		ENSP00000058691	NP_055135	HIT000014535	OTTHUMP00000017296	0	0	1	0	0	0	0	0	1	0	4	2	2	0	1	0
IPI00179164		Q5THM9	ENSP00000251691	NP_065073	HIT000000960	OTTHUMP00000017298	0	1	0	0	1	2	0	1	1	0	2	2	0	0	0	0
IPI00008202	Q9UBI9		ENSP00000230165	NP_057301	HIT000264026	OTTHUMP00000017312	0	0	0	0	0	0	0	0	0	1	0	0	0	0	0	0
IPI00017160	Q9NP79	Q5TGM1	ENSP00000011652	NP_057569	HIT000032536	OTTHUMP00000017318	2	0	1	0	2	1	1	0	3	3	1	0	0	0	1	0
IPI00144243	P31629	Q38G99	ENSP00000012134	NP_006725	HIT000307055	OTTHUMP00000017321	0	0	0	0	0	0	0	0	0	0	0	1	0	0	0	0
IPI00010232	P56589	Q6FGP5	ENSP00000036971	NP_003621	HIT000243885	OTTHUMP00000017334	0	0	0	0	0	0	0	0	1	0	0	0	0	0	0	0
IPI00401142	O75167	Q5TFA0	ENSP00000305530	NP_055536	HIT000000405	OTTHUMP00000017336	1	0	0	0	0	0	0	0	0	0	0	0	0	0	1	0
IPI00010404	Q9BWJ5	Q0JU62	ENSP00000302004	NP_112577	HIT000015197	OTTHUMP00000017343	0	0	0	0	0	1	1	0	0	0	0	0	0	0	0	0
IPI00009329	P46939	Q5SZ57	ENSP00000282749	NP_009055	HIT000322957	OTTHUMP00000017350	0	0	0	0	0	0	0	0	0	0	1	0	0	0	1	0
IPI00012363	Q13255		ENSP00000282753	NP_000829	HIT000193983	OTTHUMP00000017365	0	0	0	0	0	0	1	1	0	0	0	0	0	0	0	0
IPI00783713		Q5THL6	ENSP00000374592	XP_291154		OTTHUMP00000017391		0	0	0	0	0	1	0	0	0	0	0	0	0	0	0	1
IPI00237884	Q02952	Q4LE68	ENSP00000253332	NP_005091	HIT000221730	OTTHUMP00000017426	0	0	0	0	0	0	0	0	2	1	0	0	0	0	0	0
IPI00217683	Q02952	Q5CZB5	ENSP00000352794	NP_653080		OTTHUMP00000017427		0	0	0	0	0	0	0	0	0	0	0	1	0	0	0	1
IPI00247297	Q8NF91	Q5JT52	ENSP00000356242			OTTHUMP00000017439	1	1	0	2	2	2	1	0	5	3	3	1	0	0	0	0
IPI00411298		Q5SGD5	ENSP00000339496	NP_775786	HIT000251825	OTTHUMP00000017466	0	0	0	0	0	0	0	0	0	0	1	0	0	0	0	0
IPI00001883	Q9Y5X1	Q59ES5	ENSP00000252631	NP_057308	HIT000072438	OTTHUMP00000017492	0	0	0	0	0	0	0	0	0	0	3	2	0	0	0	0
IPI00291419	Q9BWD1	Q59GW6	ENSP00000239584	NP_005882	HIT000269377	OTTHUMP00000017527	4	1	0	2	5	5	8	4	7	7	10	6	2	3	1	1
IPI00290566	P17987		ENSP00000239585	NP_110379	HIT000292987	OTTHUMP00000017529	10	7	4	0	11	13	14	8	16	24	26	15	3	5	5	5
IPI00019580	P00747	Q5TEH4	ENSP00000241669	NP_000292	HIT000321118	OTTHUMP00000017544	0	0	0	0	1	0	0	0	0	0	0	0	0	0	0	0
IPI00016956	Q9NRZ5	Q6PJN9	ENSP00000314036	NP_064518	HIT000247761	OTTHUMP00000017554	0	0	0	0	0	0	0	0	1	0	1	1	0	0	0	0
IPI00412785	Q9Y5U8	Q5TI66	ENSP00000340784	NP_057182		OTTHUMP00000017591		0	0	0	0	1	1	0	0	0	3	2	1	0	1	2	11
IPI00513777		Q5TCT1	ENSP00000355824			OTTHUMP00000017611	0	0	0	0	0	0	0	0	1	0	0	0	0	0	0	0
IPI00161498		Q5T066	ENSP00000330265	NP_872358	HIT000096263	OTTHUMP00000017676	0	1	0	0	0	0	0	0	0	0	0	0	0	0	0	0
IPI00025019	P20618	Q53FT8	ENSP00000262193	NP_002784	HIT000294693	OTTHUMP00000017708	2	1	2	2	7	4	4	2	5	5	3	3	1	1	3	3
IPI00217465	P16403		ENSP00000339566	NP_005310	HIT000031065	OTTHUMP00000017749	1	1	3	0	6	8	3	3	3	6	1	0	4	9	4	4
IPI00018738	Q9C009	Q5VV73	ENSP00000296839	NP_150285	HIT000053989	OTTHUMP00000017774	1	0	0	0	0	0	0	0	0	0	0	0	0	0	0	0
IPI00219012	P06241	Q5R3A7	ENSP00000321899	NP_002028	HIT000194330	OTTHUMP00000017914	2	0	0	1	0	0	0	3	4	1	2	1	3	0	0	1
IPI00745230		Q59G53	ENSP00000352783	NP_002903		OTTHUMP00000017930		0	0	0	0	0	1	0	0	0	0	0	0	0	0	0	1
IPI00414367		Q5SYE8	ENSP00000344672			OTTHUMP00000017938	0	0	0	0	0	0	0	0	1	0	0	0	0	0	0	0
IPI00000873	P26640		ENSP00000211402	NP_006286	HIT000322308	OTTHUMP00000018044	2	0	1	1	0	3	3	0	1	4	1	2	1	0	3	1
IPI00011276	P21953	Q6LCK9	ENSP00000318351	NP_000047	HIT000220180	OTTHUMP00000018048	2	2	1	0	1	2	4	1	3	6	1	1	0	0	1	0
IPI00030408	Q99549	Q5JPE5	ENSP00000354672	NP_059990	HIT000086251	OTTHUMP00000018074	0	0	0	0	0	0	0	0	0	1	0	0	0	0	0	0
IPI00103525		Q8WXF1	ENSP00000279988	NP_001035879	HIT000079801	OTTHUMP00000018077	4	1	1	4	2	4	3	2	9	9	9	4	1	1	1	1
IPI00028357	Q9C0E2	Q0VG75	ENSP00000255305	NP_071904	HIT000001437	OTTHUMP00000018105	0	1	0	0	0	0	0	0	0	0	0	0	0	0	0	0
IPI00008161	P54707	Q5W035	ENSP00000218548	NP_001667	HIT000041332	OTTHUMP00000018132	0	0	0	0	0	0	0	0	0	0	2	1	0	0	0	0
IPI00032590	Q9BW62		ENSP00000261628	NP_001014402	HIT000029774	OTTHUMP00000018194	0	0	0	0	0	0	0	0	0	2	0	0	0	0	0	0
IPI00514983	Q92598		ENSP00000318687	NP_006635	HIT000042338	OTTHUMP00000018208	29	10	28	9	32	43	32	24	36	28	26	16	13	12	6	7
IPI00514412		Q5TBA8	ENSP00000369575			OTTHUMP00000018222	1	0	0	0	0	0	0	0	0	0	0	0	0	0	0	0
IPI00328195	Q8NFP9	Q5W0E7	ENSP00000308534	NP_056493	HIT000080354	OTTHUMP00000018239	2	0	0	0	3	1	0	1	3	2	4	1	1	1	0	0
IPI00004560	O15075	Q5VZZ1	ENSP00000353846			OTTHUMP00000018251	28	13	23	8	40	38	27	33	20	23	18	15	7	8	5	5
IPI00430622	Q8N0X7		ENSP00000347314	NP_055902	HIT000000327	OTTHUMP00000018254	0	0	1	0	2	0	0	1	1	1	0	0	2	2	1	0
IPI00010890	O00287	Q5VZM6	ENSP00000255476	NP_000529	HIT000040099	OTTHUMP00000018260	1	0	0	0	0	0	0	0	0	0	0	0	0	0	0	0
IPI00003389	Q9Y619	Q5VZD8	ENSP00000342267	NP_055067	HIT000069738	OTTHUMP00000018304	0	0	0	0	0	0	0	0	0	0	0	0	0	0	0	1
IPI00294242	Q92665		ENSP00000261666	NP_005821	HIT000039372	OTTHUMP00000018305	1	0	0	0	0	1	0	0	0	0	1	1	0	0	0	0
IPI00065457		Q5W0A0	ENSP00000298738	XP_495949	HIT000013858	OTTHUMP00000018353	0	0	0	0	0	0	1	0	0	0	0	0	0	0	0	0
IPI00010471	P13796	Q53FI1	ENSP00000315757	NP_002289	HIT000034874	OTTHUMP00000018362	0	0	0	0	1	1	0	0	0	0	0	0	0	0	0	0
IPI00411706	P10768		ENSP00000267160	NP_001975	HIT000001899	OTTHUMP00000018374	21	12	16	8	18	14	12	10	12	22	14	23	20	21	23	20
IPI00302829	P06400	P78495	ENSP00000267163	NP_000312	HIT000193791	OTTHUMP00000018397	0	0	0	0	0	0	0	0	2	0	0	0	0	0	0	0
IPI00465101	P51956	Q5JPB0	ENSP00000258597	NP_002489	HIT000038717	OTTHUMP00000018443	0	0	0	0	0	0	1	0	0	0	0	0	0	0	0	0
IPI00022255		Q5VWG0	ENSP00000219022	NP_006409	HIT000252611	OTTHUMP00000018468	0	0	0	0	0	0	0	0	0	0	0	1	0	0	0	0
IPI00328765	Q8WXW3	Q4G0R1	ENSP00000317144	NP_006337	HIT000077643	OTTHUMP00000018501	0	0	0	1	0	0	0	0	0	0	0	0	0	0	0	0
IPI00011250	P15374		ENSP00000237800	NP_005993	HIT000038282	OTTHUMP00000018509	0	0	0	0	1	1	0	1	0	0	1	0	0	0	0	0
IPI00552510		Q5JV86	ENSP00000317802			OTTHUMP00000018514	0	0	0	0	1	0	0	0	0	0	0	0	0	0	0	0
IPI00060715	Q96CX2		ENSP00000317141	NP_612453	HIT000242918	OTTHUMP00000018517	4	3	4	3	2	1	2	1	3	2	1	0	6	6	3	4
IPI00102543	Q96PX8		ENSP00000320697	NP_443142	HIT000001625	OTTHUMP00000018546	0	0	0	0	0	1	0	0	0	0	0	0	0	0	0	0
IPI00016679	O94991	Q4QQH1	ENSP00000298025	NP_056382	HIT000007525	OTTHUMP00000018547	1	0	0	0	0	0	0	0	0	0	0	0	0	0	0	0
IPI00019180	P78333	Q9BX27	ENSP00000320553	NP_004457	HIT000052241	OTTHUMP00000018551	0	0	0	0	0	0	0	0	0	0	1	0	0	0	0	0
IPI00006675	O15439	O75555	ENSP00000261295	NP_005836	HIT000065846	OTTHUMP00000018560	0	1	0	0	0	0	0	0	0	0	0	0	0	0	0	0
IPI00019231	P78369	Q6IBF9	ENSP00000299339	NP_008915		OTTHUMP00000018562		0	0	0	0	0	0	0	0	0	0	0	1	0	0	0	1
IPI00019346	P10114	Q5JSC1	ENSP00000245304	NP_066361	HIT000073863	OTTHUMP00000018581	5	1	0	0	4	6	4	3	3	5	6	5	3	4	1	4
IPI00783829	O00410	Q5T578	ENSP00000350219	NP_002262	HIT000325484	OTTHUMP00000018583	4	0	9	4	3	2	5	5	7	9	16	9	3	9	4	5
IPI00646369		Q6GQR2	ENSP00000365612			OTTHUMP00000018618	0	1	0	0	0	0	0	0	0	0	0	0	0	0	0	0
IPI00018415	Q99805	Q2TAY5	ENSP00000245361	NP_004791	HIT000221624	OTTHUMP00000018623	0	2	0	1	1	0	0	0	0	0	0	0	0	0	0	0
IPI00217996		Q6ZMI7	ENSP00000251127	NP_443099	HIT000084726	OTTHUMP00000018654	0	0	1	0	0	0	0	0	0	0	0	0	0	0	0	0
IPI00005126	P52799	Q2PDH7	ENSP00000245323	NP_004084	HIT000221713	OTTHUMP00000018686	1	0	1	0	1	2	1	0	0	0	0	0	0	0	0	0
IPI00477621		Q5W0J2	ENSP00000365077	XP_001128712	HIT000192020	OTTHUMP00000018689	0	0	0	0	0	0	0	0	0	0	0	0	0	0	0	1
IPI00217669	P49917		ENSP00000310449	NP_002303	HIT000051922	OTTHUMP00000018690	1	0	0	0	0	0	0	0	0	0	0	0	0	0	0	0
IPI00464978	Q9Y4H2	Q8TF73	ENSP00000365016	NP_003740	HIT000065930	OTTHUMP00000018696	1	0	0	0	1	0	0	0	0	1	1	1	0	0	0	0
IPI00477950		Q14052	ENSP00000257309			OTTHUMP00000018700	1	1	3	2	4	2	4	2	3	2	2	3	1	1	2	1
IPI00514429		Q5T8L5	ENSP00000364850			OTTHUMP00000018723	0	0	0	0	0	1	0	0	0	0	0	0	0	0	0	0
IPI00477099		Q5VXT1	ENSP00000364758			OTTHUMP00000018740	0	0	0	0	0	1	0	0	0	0	0	0	0	0	0	0
IPI00004503	P11279	Q8WU33	ENSP00000333298	NP_005552	HIT000191253	OTTHUMP00000018748	0	0	0	0	0	0	0	0	0	1	1	1	0	0	0	0
IPI00398974	Q5W0Z9	Q2TB82	ENSP00000313583	NP_694983	HIT000093612	OTTHUMP00000018802	0	0	0	0	1	0	1	0	0	0	0	0	1	0	1	0
IPI00412408	P51587	Q5TBJ7	ENSP00000267071	NP_000050	HIT000219873	OTTHUMP00000018803	1	0	0	0	0	0	0	0	0	0	0	0	0	0	0	0
IPI00027993	P57735	Q5VYA2	ENSP00000338772	NP_065120	HIT000278702	OTTHUMP00000018847	0	0	0	0	0	0	0	0	0	0	0	0	0	0	0	1
IPI00292496		Q3ZCM7	ENSP00000311042	NP_817124	HIT000285420	OTTHUMP00000018933	0	0	0	0	0	1	0	0	0	0	0	0	0	0	0	0
IPI00032087	Q9Y2E4	Q5SS78	ENSP00000280886	NP_055789	HIT000000651	OTTHUMP00000018940	1	0	2	0	0	1	0	2	0	0	3	0	0	0	0	1
IPI00220014	Q13907	Q32Q13	ENSP00000263151	NP_004499	HIT000259764	OTTHUMP00000018951	0	0	0	0	0	1	0	0	0	0	0	0	0	0	0	0
IPI00032202	Q9Y2I8	Q0JVA5	ENSP00000263150	NP_054742	HIT000000699	OTTHUMP00000018956	1	0	1	0	2	1	0	2	4	3	0	5	1	0	0	0
IPI00009790	Q01813	Q5VSR8	ENSP00000263145	NP_002618	HIT000040690	OTTHUMP00000018966	75	41	35	19	54	59	63	55	39	45	50	56	24	28	36	28
IPI00015671		Q4QQJ5	ENSP00000315759	NP_079079	HIT000008592	OTTHUMP00000019000	10	3	8	8	20	22	19	25	15	14	15	13	12	16	9	6
IPI00031461	P50395	Q6IAT1	ENSP00000340585	NP_001485	HIT000325765	OTTHUMP00000019010	21	10	17	5	18	28	21	25	21	25	33	27	17	19	22	21
IPI00513929		Q5SX86	ENSP00000369475			OTTHUMP00000019013	1	0	1	0	1	0	0	0	3	0	0	2	0	0	0	2
IPI00478410	P36542	Q6I9V2	ENSP00000349142	NP_001001973	HIT000100602	OTTHUMP00000019068	19	27	19	14	24	31	28	23	26	17	30	41	4	7	11	5
IPI00063408		Q68CU5	ENSP00000263035	NP_061176	HIT000030924	OTTHUMP00000019087	0	0	0	0	0	1	0	0	0	0	0	0	0	0	0	0
IPI00170508	Q8IU85		ENSP00000329160	NP_705718	HIT000061385	OTTHUMP00000019119	0	0	0	0	2	3	1	1	1	0	2	0	0	0	0	0
IPI00029056	P49903	Q5T5U8	ENSP00000199674	NP_036379	HIT000261194	OTTHUMP00000019139	0	0	0	0	0	0	0	0	1	0	0	1	0	0	0	0
IPI00027799	Q9H098	Q0JSN8	ENSP00000181796	NP_113641	HIT000047286	OTTHUMP00000019153	0	0	0	0	0	0	0	0	0	0	0	0	0	2	0	0
IPI00398874	Q8N6N7		ENSP00000318203	NP_001034933	HIT000020393	OTTHUMP00000019197	1	1	0	0	6	6	5	5	4	4	8	9	1	2	0	0
IPI00000265		Q32M49	ENSP00000344769	NP_001010924	HIT000024150	OTTHUMP00000019205	2	1	1	0	3	3	1	0	0	0	1	0	0	1	1	0
IPI00023410	P53708		ENSP00000265937	NP_003629	HIT000193258	OTTHUMP00000019207	0	0	0	0	0	0	0	0	0	1	0	0	0	0	0	0
IPI00160130	O60494	Q59ED1	ENSP00000265929	NP_001072	HIT000063148	OTTHUMP00000019220	0	0	0	0	0	0	0	0	0	0	0	0	0	1	0	0
IPI00418471	P08670	Q53HU8	ENSP00000224237	NP_003371	HIT000262376	OTTHUMP00000019224	49	27	12	5	33	35	5	5	33	35	99	75	23	20	29	19
IPI00607769	Q92783		ENSP00000366721			OTTHUMP00000019239	2	3	4	0	4	9	4	5	3	2	6	5	4	5	2	2
IPI00418240		Q59FZ8	ENSP00000308112	NP_998734		OTTHUMP00000019268		6	1	4	2	12	9	5	6	7	9	11	4	1	2	3	82
IPI00553149		Q5JUT3	ENSP00000365749			OTTHUMP00000019301	0	0	0	0	0	0	0	0	0	0	0	0	0	0	1	0
IPI00174955		Q5VV17	ENSP00000298035	XP_166659	HIT000242535	OTTHUMP00000019312	0	0	0	0	0	0	0	0	0	0	0	1	0	0	0	0
IPI00169307		Q0VF98	ENSP00000224853	NP_065875	HIT000080456	OTTHUMP00000019319	0	1	0	0	0	0	0	0	0	1	1	1	0	0	0	0
IPI00016287	Q8IYQ7	Q8N9J5	ENSP00000328525	NP_079114	HIT000056636	OTTHUMP00000019329	0	0	0	0	0	0	0	0	3	2	0	0	0	0	0	0
IPI00012796	Q05329	Q5VZ30	ENSP00000259271	NP_000809	HIT000196343	OTTHUMP00000019335	6	4	3	1	6	5	0	2	5	3	3	5	0	1	0	0
IPI00014577	Q9NP72	Q0JTZ2	ENSP00000265946	NP_067075	HIT000040722	OTTHUMP00000019371	2	1	0	0	7	7	3	5	6	8	4	5	6	7	5	3
IPI00643720		Q8TAN9	ENSP00000347141	NP_060715	HIT000004187	OTTHUMP00000019588	10	2	2	1	9	8	4	5	12	11	11	8	1	2	1	0
IPI00016353	O94907		ENSP00000224974	NP_036374	HIT000273385	OTTHUMP00000019617	0	1	0	0	0	0	0	0	0	0	0	0	0	0	0	0
IPI00020510	Q9NZ45	Q1X902	ENSP00000242476	NP_060934	HIT000259949	OTTHUMP00000019629	20	17	18	10	9	16	19	20	13	9	7	5	10	11	14	14
IPI00289396		Q96FC7	ENSP00000298208	NP_115815		OTTHUMP00000019638		6	1	0	0	0	2	2	2	1	3	1	0	1	0	1	20
IPI00000634	Q16204	Q6GSG7	ENSP00000263102	NP_005427	HIT000216450	OTTHUMP00000019644	4	0	2	1	0	0	3	5	1	3	3	4	1	2	2	0
IPI00472779	Q12955	Q5VXD5	ENSP00000280772	NP_066267	HIT000218140	OTTHUMP00000019653	4	4	6	1	11	2	5	4	7	8	15	11	3	2	5	4
IPI00045939	Q96SZ5	Q5W139	ENSP00000324787	NP_116193	HIT000040580	OTTHUMP00000019674	2	0	0	0	0	0	1	0	1	0	0	0	0	0	0	0
IPI00303112	Q8NFU7		ENSP00000260906	NP_085128	HIT000079530	OTTHUMP00000019708	0	0	0	0	0	0	0	1	0	0	0	0	0	0	0	0
IPI00477355	Q96EK5		ENSP00000354848	NP_056449	HIT000000995	OTTHUMP00000019712	0	0	0	0	0	0	0	0	0	0	0	1	0	0	0	0
IPI00414612		Q2TB91	ENSP00000298648	NP_079406	HIT000019941	OTTHUMP00000019718	0	0	1	0	0	0	0	0	0	0	0	0	0	0	0	0
IPI00411426	O75436		ENSP00000263559	NP_004887	HIT000039586	OTTHUMP00000019721	1	1	2	2	8	7	3	2	2	2	3	2	0	0	0	0
IPI00000736	O95858		ENSP00000263561	NP_036471	HIT000300287	OTTHUMP00000019726	0	0	0	0	0	0	0	0	0	0	0	0	0	1	0	0
IPI00015018	Q15181	Q2M348	ENSP00000317687	NP_066952	HIT000014799	OTTHUMP00000019741	14	4	4	2	14	13	9	7	11	6	11	9	4	8	4	0
IPI00015954	Q9NR31	Q5SQT9	ENSP00000263562	NP_064535	HIT000083126	OTTHUMP00000019743	0	1	0	0	0	0	0	0	1	0	1	0	0	0	0	0
IPI00002570	Q13542	Q6FG68	ENSP00000277938	NP_004087	HIT000053528	OTTHUMP00000019756	3	1	2	2	0	2	0	0	1	0	0	0	3	1	0	0
IPI00218568	P61457	Q6FGB3	ENSP00000299299	NP_000272	HIT000066528	OTTHUMP00000019765	0	0	0	0	0	0	0	0	0	2	0	1	0	0	1	0
IPI00006128	Q92563		ENSP00000321108	NP_055582	HIT000042408	OTTHUMP00000019778	0	0	0	0	0	1	0	0	0	0	0	0	0	0	0	0
IPI00014400	Q9NXW2	Q659G2	ENSP00000345575	NP_001002762	HIT000261628	OTTHUMP00000019786	0	0	0	0	0	0	0	0	0	0	0	0	0	1	0	0
IPI00171573		Q8NE86	ENSP00000340034	NP_612366	HIT000042076	OTTHUMP00000019790	0	0	0	0	1	0	1	0	0	0	0	1	0	0	0	0
IPI00639796			ENSP00000362028			OTTHUMP00000019803	0	1	0	0	0	0	0	0	0	0	0	0	0	0	0	0
IPI00300502	Q9NP98		ENSP00000331548	NP_067068	HIT000040005	OTTHUMP00000019817	0	0	0	0	0	1	0	0	0	0	0	0	0	0	0	0
IPI00027809	P16298	Q5F2F9	ENSP00000326882	NP_066955	HIT000195327	OTTHUMP00000019823	6	5	8	3	12	10	7	4	9	4	8	5	0	6	2	0
IPI00296678		Q5SQZ3	ENSP00000315599	NP_751909		OTTHUMP00000019843		3	2	1	0	4	4	3	2	7	8	8	6	0	1	1	50
IPI00032459	Q9Y2T2	Q5JQ12	ENSP00000327518	NP_036227	HIT000040153	OTTHUMP00000019859	0	0	0	0	0	0	0	0	0	0	0	0	0	0	1	0
IPI00642041	Q86VU5		ENSP00000298482	NP_653190	HIT000053250	OTTHUMP00000019881	0	0	0	0	0	0	0	0	0	2	0	0	0	0	0	0
IPI00024163	O14802	Q7Z755	ENSP00000277783	NP_008986	HIT000062572	OTTHUMP00000019920	0	0	0	0	0	0	0	0	0	0	0	0	0	0	0	1
IPI00414320	P50995	Q59EP1	ENSP00000265447	NP_001148	HIT000246439	OTTHUMP00000019955	3	3	4	0	3	2	1	1	8	6	10	8	0	1	0	0
IPI00374337	Q9ULK0	Q5JQ58	ENSP00000330148	NP_060021	HIT000047041	OTTHUMP00000020003	0	0	0	0	2	0	0	0	0	0	2	0	0	0	0	0
IPI00297714	O76070	Q6FHG5	ENSP00000344658	NP_003078	HIT000062416	OTTHUMP00000020013	17	7	11	5	40	37	29	25	50	44	34	28	23	24	8	8
IPI00016801	P00367	Q14400	ENSP00000277865	NP_005262	HIT000194758	OTTHUMP00000020018	64	59	63	39	127	112	66	59	74	64	78	87	50	36	53	47
IPI00020017	Q15847	Q5TBU5	ENSP00000277864	NP_006820	HIT000031973	OTTHUMP00000020019	0	0	0	0	0	0	1	2	0	0	0	1	0	0	0	0
IPI00171445	Q8NBU5	Q6DKG1	ENSP00000260709	NP_116199	HIT000082258	OTTHUMP00000020030	0	0	0	0	0	0	0	0	1	2	1	0	0	0	1	0
IPI00008603	P62736	Q6FI19	ENSP00000224784	NP_001604	HIT000269810	OTTHUMP00000020042	1	0	0	0	0	0	0	0	0	0	0	0	0	0	0	0
IPI00004294	Q15327		ENSP00000277871	NP_055206	HIT000038394	OTTHUMP00000020084	0	0	0	0	0	0	0	0	0	0	0	1	0	0	0	0
IPI00414168		Q9NX47	ENSP00000351813	NP_060294	HIT000037134	OTTHUMP00000020096	1	0	0	0	0	0	0	0	0	0	0	1	0	0	0	0
IPI00021091	O95970	Q59FQ2	ENSP00000265991	NP_005088		OTTHUMP00000020121		7	2	4	4	6	2	3	3	8	6	2	3	0	1	3	54
IPI00007124		O94968	ENSP00000360272			OTTHUMP00000020138	0	0	0	2	0	0	0	0	2	0	2	0	0	0	0	0
IPI00306791	Q9BX66	Q5T924	ENSP00000265987	NP_001030126	HIT000078294	OTTHUMP00000020142	0	0	0	0	1	2	0	0	0	0	0	0	0	0	0	0
IPI00166933	Q8N655		ENSP00000286067	NP_056467	HIT000050888	OTTHUMP00000020178	0	0	0	0	0	0	0	0	0	0	0	0	0	0	0	1
IPI00384212		Q0JS47	ENSP00000359674	NP_001009997	HIT000097599	OTTHUMP00000020214	0	0	0	0	1	0	0	0	0	0	0	0	0	0	0	0
IPI00402107	Q2TAP0		ENSP00000285621	NP_001010917		OTTHUMP00000020232		0	0	0	0	0	0	0	1	0	0	0	0	0	0	0	1
IPI00296156	Q8N2H3		ENSP00000238999	NP_116098	HIT000032626	OTTHUMP00000020249	0	0	0	0	0	0	0	0	0	0	0	1	0	0	0	0
IPI00219029	P17174	Q2TU84	ENSP00000239123	NP_002070	HIT000298438	OTTHUMP00000020254	102	74	56	52	61	72	66	77	41	65	60	57	60	62	77	68
IPI00023868	Q92887	Q5T2B1	ENSP00000266063	NP_000383	HIT000220793	OTTHUMP00000020267	1	0	0	0	1	0	0	0	0	0	0	0	0	0	0	0
IPI00005104	O15111	Q562E6	ENSP00000266054	NP_001269	HIT000066435	OTTHUMP00000020273	0	0	0	0	0	0	0	0	0	0	0	0	0	1	0	0
IPI00101600		Q69YN2	ENSP00000326411	NP_060764	HIT000033941	OTTHUMP00000020277	0	0	0	0	0	0	0	0	0	0	0	0	0	0	1	0
IPI00329606	Q9BWM7		ENSP00000224807	NP_112233	HIT000081742	OTTHUMP00000020311	4	0	2	1	17	20	13	20	10	5	23	12	3	6	0	1
IPI00477231	O60502		ENSP00000354850	NP_036347	HIT000063324	OTTHUMP00000020345	1	1	1	0	2	1	2	1	3	1	4	9	0	0	1	1
IPI00646323		Q5T2E6	ENSP00000359047	NP_078817	HIT000006450	OTTHUMP00000020353	1	0	0	0	0	0	0	0	0	1	1	1	0	0	0	0
IPI00217012		Q15673	ENSP00000020673	NP_002770	HIT000052178	OTTHUMP00000020364	0	1	0	0	0	0	0	0	0	2	1	0	0	0	0	0
IPI00029468	P61163	Q0JTZ9	ENSP00000260680	NP_005727	HIT000323909	OTTHUMP00000020366	12	9	11	7	12	14	9	12	6	7	8	16	7	5	20	11
IPI00003327	P36405	Q53X83	ENSP00000260746	NP_004302	HIT000217642	OTTHUMP00000020373	2	0	1	2	7	5	2	4	2	5	6	4	0	2	0	1
IPI00043564	Q96NB2	Q5JSM6	ENSP00000286939	NP_849189	HIT000039400	OTTHUMP00000020380	0	0	0	0	0	0	0	0	0	0	0	1	0	0	0	0
IPI00029054	P49902	Q5QNZ8	ENSP00000339479	NP_036361	HIT000030504	OTTHUMP00000020390	1	0	0	0	0	1	0	0	1	1	0	0	0	1	0	0
IPI00001453	Q16352	Q59EM6	ENSP00000278020	NP_116116	HIT000032782	OTTHUMP00000020403	92	69	83	58	82	107	149	137	79	76	121	122	117	124	149	127
IPI00400922	Q14690	Q2TA92	ENSP00000278073	NP_055791	HIT000042322	OTTHUMP00000020409	0	0	0	0	0	0	1	0	0	0	0	0	0	0	0	0
IPI00019755	P78417		ENSP00000278062	NP_004823	HIT000054246	OTTHUMP00000020429	4	2	0	1	1	2	3	3	5	2	5	7	5	3	5	5
IPI00174574		Q5T655	ENSP00000350351	NP_001008723	HIT000055660	OTTHUMP00000020442	0	0	0	0	0	0	0	0	0	0	0	1	0	0	0	0
IPI00010381	Q9UPU3	Q17R88	ENSP00000286935	NP_055793	HIT000000776	OTTHUMP00000020444	0	0	0	1	0	0	0	0	0	0	0	0	0	0	0	0
IPI00555937		Q5CAJ2	ENSP00000358713			OTTHUMP00000020445	0	0	0	0	1	0	0	0	0	0	0	0	0	0	0	0
IPI00219420	Q9UQE7	Q5T482	ENSP00000350226	NP_005436	HIT000062500	OTTHUMP00000020477	0	0	0	1	0	0	0	0	0	0	0	0	0	0	0	0
IPI00059472	Q96AJ9	Q5W0D7	ENSP00000281221	NP_660207	HIT000037809	OTTHUMP00000020493	0	0	0	0	0	0	0	0	1	0	0	0	0	0	0	0
IPI00011932	O43301		ENSP00000298777	XP_048898	HIT000000134	OTTHUMP00000020566	64	47	38	31	65	68	67	59	46	66	60	63	45	60	63	73
IPI00448751		Q68DG1	ENSP00000260777	NP_060800	HIT000306450	OTTHUMP00000020573	0	0	0	0	1	2	3	2	0	0	0	1	2	3	2	2
IPI00029012	Q14152	Q15778	ENSP00000263141	NP_003741	HIT000042275	OTTHUMP00000020589	0	0	0	1	1	3	0	0	4	1	1	1	0	0	1	1
IPI00641582	O95817	Q3B763	ENSP00000281679	NP_004272	HIT000032821	OTTHUMP00000020599	0	0	1	1	1	0	0	0	2	0	0	1	10	4	6	1
IPI00412224	Q9BZH6	Q659C9	ENSP00000263461	NP_060587	HIT000096177	OTTHUMP00000020620	0	0	0	0	0	0	0	0	0	1	0	0	0	0	0	0
IPI00024623	P45954	Q5SQN6	ENSP00000346877	NP_001600	HIT000218102	OTTHUMP00000020685	0	0	0	0	0	0	0	0	1	1	0	0	0	0	0	0
IPI00022334	P04181	Q59HE2	ENSP00000224242	NP_000265	HIT000037753	OTTHUMP00000020690	1	0	0	1	4	0	3	0	3	2	3	3	0	0	1	0
IPI00005474		Q2TBE9	ENSP00000224892	NP_071409	HIT000059519	OTTHUMP00000020691	3	3	3	0	2	2	0	0	1	3	3	2	0	0	3	0
IPI00299517	Q15018		ENSP00000298492	NP_115558	HIT000042293	OTTHUMP00000020697	1	0	0	0	1	1	1	2	0	0	0	0	0	0	0	0
IPI00015286	Q14185	Q5VXF6	ENSP00000280333	NP_001371	HIT000101645	OTTHUMP00000020733	0	0	0	0	0	0	0	1	0	0	0	0	1	0	0	0
IPI00008552	O76003	Q5JV01	ENSP00000225000	NP_006532	HIT000281505	OTTHUMP00000020746	0	0	1	0	1	0	2	0	1	0	0	0	1	1	0	0
IPI00022388	O14531		ENSP00000339850	NP_006417	HIT000058087	OTTHUMP00000020757	6	5	7	3	22	19	19	21	14	13	14	8	3	4	4	3
IPI00456060		Q5JSF6	ENSP00000341522			OTTHUMP00000020782	0	1	0	0	0	0	0	0	0	0	0	0	0	0	0	0
IPI00024993	P30084		ENSP00000248508	NP_004083	HIT000088076	OTTHUMP00000020811	38	25	25	19	37	43	32	36	35	40	41	41	28	31	17	17
IPI00644187		Q5JWQ0	ENSP00000363956			OTTHUMP00000020824	0	0	0	0	0	0	0	0	0	0	0	0	0	0	1	0
IPI00646134		Q5JWQ5	ENSP00000363947			OTTHUMP00000020827	0	0	0	0	0	0	0	0	0	0	0	0	0	1	0	0
IPI00647930	Q8IY26		ENSP00000371307	NP_982278	HIT000051993	OTTHUMP00000021003	0	0	0	0	1	2	0	1	2	0	0	0	0	0	0	0
IPI00465256	Q9UIJ7	Q7Z4Y4	ENSP00000276892	NP_057366	HIT000004027	OTTHUMP00000021016	7	2	2	2	3	5	2	2	3	1	7	4	0	5	3	4
IPI00025853	P04808		ENSP00000223862	NP_008842	HIT000032552	OTTHUMP00000021026	0	0	0	0	0	0	0	0	0	0	0	1	0	0	0	0
IPI00514622	O60518	Q5T7X3	ENSP00000259569	NP_036548	HIT000063465	OTTHUMP00000021039	0	0	0	0	0	0	0	0	0	0	0	1	0	0	1	0
IPI00019171	Q99962	Q3V639	ENSP00000326735	NP_003017	HIT000063326	OTTHUMP00000021084	32	22	31	28	42	34	35	44	29	34	37	45	19	16	22	24
IPI00719210	Q7Z4H7	Q0JT19	ENSP00000276916	NP_060115	HIT000081437	OTTHUMP00000021100	0	0	0	0	0	0	0	0	0	0	0	0	0	0	1	0
IPI00293307	Q99541	Q6FHZ7	ENSP00000276914	NP_001113	HIT000032231	OTTHUMP00000021107	0	1	0	0	0	0	0	0	0	2	0	0	0	0	0	0
IPI00003072	P01562	Q2M1L8	ENSP00000276927	NP_076918	HIT000320817	OTTHUMP00000021142	0	0	0	0	1	0	0	0	0	0	0	0	0	0	0	0
IPI00001120		Q6ZMD0	ENSP00000310126	NP_689783	HIT000012986	OTTHUMP00000021174	0	0	0	0	0	1	0	0	0	0	0	0	0	0	0	0
IPI00008485	P21399	Q5VZA7	ENSP00000309477	NP_002188	HIT000326363	OTTHUMP00000021176	3	1	0	2	0	0	0	0	2	3	2	5	1	2	2	1
IPI00219385	O95139		ENSP00000335018	NP_002484	HIT000034588	OTTHUMP00000021179	7	3	3	2	8	3	4	4	7	5	5	5	3	5	4	1
IPI00305833	Q2TAY7		ENSP00000263222	NP_060695	HIT000031258	OTTHUMP00000021186	0	0	0	0	0	0	0	0	0	1	0	0	0	0	0	0
IPI00012535	P31689	Q5T7Q0	ENSP00000338840	NP_001530	HIT000020396	OTTHUMP00000021193	6	5	11	7	10	6	3	6	5	8	2	2	3	3	7	3
IPI00100796	Q9NZZ3		ENSP00000223500	NP_057494	HIT000285356	OTTHUMP00000021197	0	0	0	0	3	1	0	0	1	0	4	1	2	4	1	0
IPI00418603		Q712K3	ENSP00000263228	NP_060281	HIT000053176	OTTHUMP00000021236	0	0	0	0	0	0	0	0	0	0	0	1	0	0	0	0
IPI00221231	P50583	Q5T589	ENSP00000338397	NP_001152	HIT000219031	OTTHUMP00000021256	0	0	3	0	1	1	0	2	0	0	0	0	0	0	0	0
IPI00167641		Q14379	ENSP00000368123			OTTHUMP00000021299	0	1	0	0	0	0	0	0	0	0	0	0	0	0	0	0
IPI00414898	Q9UPV7		ENSP00000242315	XP_048592	HIT000096606	OTTHUMP00000021312	17	8	8	3	15	9	10	7	16	16	25	13	2	3	7	4
IPI00334190	Q9UJZ1		ENSP00000298005	NP_038470	HIT000270914	OTTHUMP00000021320	7	0	6	0	4	7	3	5	0	3	9	3	1	2	1	0
IPI00022774	P55072	Q0IIN5	ENSP00000298001	NP_009057	HIT000001855	OTTHUMP00000021326	59	33	47	26	65	63	51	68	56	60	64	57	40	34	39	26
IPI00444656	Q8N2Y8	Q5W134	ENSP00000355177	NP_055621	HIT000000081	OTTHUMP00000021331	1	0	0	0	0	0	0	0	0	0	0	0	0	0	0	0
IPI00004407	Q9Y3P8		ENSP00000259608	NP_055265	HIT000244378	OTTHUMP00000021333	0	0	0	0	1	0	0	0	0	0	0	0	0	0	0	0
IPI00021987	Q92546	Q5TCV5	ENSP00000224034	XP_376830	HIT000042391	OTTHUMP00000021349	0	0	0	1	0	0	0	0	0	0	0	0	0	0	0	0
IPI00000335	Q9BX68	Q53HJ8	ENSP00000259667	NP_115982	HIT000053231	OTTHUMP00000021363	1	1	0	0	0	0	1	0	1	6	7	2	0	0	0	0
IPI00014587	P09496	Q2XPN5	ENSP00000242285	NP_009027	HIT000194731	OTTHUMP00000021365	0	0	0	0	0	0	0	0	0	1	0	0	0	0	0	0
IPI00216393	P09496	Q53XZ1	ENSP00000242284	NP_001824		OTTHUMP00000021366		0	0	0	0	0	2	1	1	3	1	1	0	2	1	0	12
IPI00007067	Q9H4G4		ENSP00000242273	NP_071738	HIT000306019	OTTHUMP00000021371	0	0	0	0	0	0	2	7	0	0	0	0	2	3	7	4
IPI00299881	Q13939	Q8WWB2	ENSP00000334996	NP_005884	HIT000077764	OTTHUMP00000021373	1	0	0	0	0	0	0	0	0	0	0	0	1	0	0	0
IPI00037448	Q9UBQ7	Q5T945	ENSP00000313432	NP_036335	HIT000295600	OTTHUMP00000021379	5	4	8	1	3	13	7	7	8	13	12	4	9	11	7	7
IPI00061087	Q96E09		ENSP00000343162	NP_612206	HIT000046252	OTTHUMP00000021421	0	0	1	0	0	0	0	0	0	0	0	0	0	0	0	0
IPI00015932	Q13886		ENSP00000238031	NP_001197	HIT000101341	OTTHUMP00000021441	0	0	0	0	0	0	0	1	0	0	0	0	0	0	0	0
IPI00465184	Q9Y2T3	Q5SZC7	ENSP00000238018	NP_004284	HIT000062488	OTTHUMP00000021463	32	14	26	15	40	30	21	19	35	60	51	50	17	24	20	20
IPI00218918	P04083	Q5TZZ9	ENSP00000257497	NP_000691	HIT000280183	OTTHUMP00000021474	1	0	1	0	1	1	0	0	1	0	1	0	0	1	0	0
IPI00218914	P00352	Q5SYR1	ENSP00000297785	NP_000680	HIT000009915	OTTHUMP00000021482	7	5	5	3	7	5	3	0	2	2	4	1	2	2	5	2
IPI00017504	Q8IXQ3		ENSP00000257496	NP_060468	HIT000003446	OTTHUMP00000021490	0	0	0	0	0	0	0	0	0	0	0	0	1	0	0	0
IPI00414836	Q92882		ENSP00000237946	NP_036515	HIT000220780	OTTHUMP00000021492	0	0	0	0	0	0	0	0	1	1	0	0	0	0	0	0
IPI00099995	Q969G6	Q5JSG9	ENSP00000257452	NP_060809	HIT000033028	OTTHUMP00000021501	0	0	0	0	0	0	0	0	0	0	1	0	0	0	0	0
IPI00004557		Q58A63	ENSP00000365910	NP_056040		OTTHUMP00000021504		1	0	1	0	0	0	0	0	1	0	0	0	0	0	0	3
IPI00288947	P50148	Q6NT27	ENSP00000286548	NP_002063	HIT000259715	OTTHUMP00000021516	12	12	12	10	13	15	16	12	9	10	10	10	13	15	20	18
IPI00640133		Q5BJE3	ENSP00000277082	XP_937202	HIT000005979	OTTHUMP00000021520	0	0	0	1	0	0	0	0	0	0	0	0	0	0	0	0
IPI00001734	Q9Y617	Q5T7G6	ENSP00000277070	NP_478059	HIT000032041	OTTHUMP00000021524	2	2	6	2	6	3	3	6	8	11	16	9	6	5	10	2
IPI00099550	Q9UMX0	Q5T6J9	ENSP00000297810	NP_038466	HIT000072641	OTTHUMP00000021544	2	1	4	1	6	6	2	3	3	2	5	2	0	2	1	0
IPI00514561		Q59F98	ENSP00000365434			OTTHUMP00000021552	0	0	0	0	0	0	0	0	0	0	2	0	0	0	0	0
IPI00023807	Q92854	Q4LE41	ENSP00000343418	NP_006369	HIT000220644	OTTHUMP00000021622	1	0	0	0	1	0	1	1	3	4	0	2	0	0	0	0
IPI00063302	Q96HU8		ENSP00000297682	NP_060064	HIT000044501	OTTHUMP00000021626	2	0	0	3	1	1	0	2	0	0	1	0	1	1	0	0
IPI00018597	P43405	Q5T6N7	ENSP00000326032	NP_003168	HIT000030543	OTTHUMP00000021627	0	0	0	0	0	0	0	0	0	0	0	0	1	0	0	0
IPI00025465	P20774	Q6FIB0	ENSP00000262551	NP_054776	HIT000293265	OTTHUMP00000021650	13	10	2	1	7	9	0	0	5	5	1	2	0	1	0	0
IPI00002375	P28289		ENSP00000259365	NP_003266	HIT000196385	OTTHUMP00000021743	4	2	8	1	6	5	5	6	4	5	5	2	1	1	0	0
IPI00019380	Q09161		ENSP00000259464	NP_002477	HIT000101362	OTTHUMP00000021753	0	0	0	0	0	0	0	0	0	0	1	0	0	0	0	0
IPI00147874	Q9NR45		ENSP00000210444	NP_061819	HIT000029276	OTTHUMP00000021769	0	0	0	0	0	0	0	0	0	2	1	0	0	0	1	0
IPI00027250	O75899		ENSP00000259455	NP_005449	HIT000064681	OTTHUMP00000021776	2	1	2	1	7	8	3	3	2	1	2	0	0	0	0	0
IPI00220835	P60468	Q53FA5	ENSP00000223641	NP_006799	HIT000030612	OTTHUMP00000021784	0	0	1	0	0	0	0	0	1	0	0	0	0	0	2	0
IPI00401264	Q9BS26	Q4VXC1	ENSP00000262455	NP_055866	HIT000000290	OTTHUMP00000021788	0	0	1	0	0	0	2	2	1	2	3	2	0	0	0	0
IPI00034309	Q9Y283	Q2NKL0	ENSP00000262457	NP_055240	HIT000063474	OTTHUMP00000021790	0	0	0	0	0	0	0	0	0	0	0	1	0	0	0	0
IPI00549664	Q9NXF1		ENSP00000344645	NP_060216	HIT000059834	OTTHUMP00000021797	0	0	1	0	0	0	0	0	0	0	0	0	0	0	0	0
IPI00004845	Q9UFN0	Q5VX32	ENSP00000344174	NP_056284	HIT000032534	OTTHUMP00000021828	5	4	1	1	4	5	6	4	3	4	4	0	2	0	3	3
IPI00020035	Q9BS92	Q5VX30	ENSP00000342471	NP_060846	HIT000038195	OTTHUMP00000021829	1	0	1	1	0	0	0	0	0	0	0	1	0	0	0	1
IPI00181727		Q8N450	ENSP00000223537	NP_997530	HIT000051791	OTTHUMP00000021845	0	0	0	0	1	0	0	1	0	0	0	0	0	0	0	1
IPI00647451		Q5SVN5	ENSP00000363821			OTTHUMP00000021851	0	0	0	0	0	0	0	0	0	0	0	0	1	0	0	0
IPI00008223	P54727	Q53F10	ENSP00000262560	NP_002865	HIT000045099	OTTHUMP00000021857	3	1	4	3	8	6	3	3	4	2	0	1	2	2	2	2
IPI00000163	Q9UBT7	Q5JTQ9	ENSP00000323351			OTTHUMP00000021874	0	0	0	0	0	0	0	0	0	0	0	0	1	0	0	0
IPI00292304	Q9P0K9		ENSP00000259327	NP_055149	HIT000071904	OTTHUMP00000021879	1	0	0	0	0	1	3	0	1	1	0	1	0	0	0	2
IPI00216298	P10599	Q5T937	ENSP00000259332	NP_003320	HIT000323628	OTTHUMP00000021892	66	71	85	90	130	171	81	94	60	54	58	69	50	34	44	33
IPI00157790	Q5VYK3		ENSP00000259335	XP_001129450	HIT000047120	OTTHUMP00000021908	0	0	0	0	1	1	1	0	2	3	1	1	0	1	0	0
IPI00292657	Q14914		ENSP00000238248	NP_036344		OTTHUMP00000021915		0	0	0	0	0	2	2	1	3	7	4	2	0	1	2	26
IPI00065383	Q5VXU9	Q2M1H8	ENSP00000297885			OTTHUMP00000021924	0	0	0	0	0	1	0	0	0	0	0	0	0	0	0	0
IPI00414384		Q658M8	ENSP00000262542	NP_115679	HIT000250697	OTTHUMP00000021935	1	0	1	0	2	1	1	2	5	3	6	2	0	1	1	2
IPI00010314	P13716		ENSP00000277315	NP_000022	HIT000030039	OTTHUMP00000021953	0	0	0	0	0	0	0	2	1	0	0	2	2	2	1	0
IPI00009931		Q9BSH5	ENSP00000238379	NP_112496	HIT000247712	OTTHUMP00000021956	2	2	1	1	0	1	1	1	0	0	0	0	0	0	0	0
IPI00032291	P01031	Q14CJ0	ENSP00000223642	NP_001726	HIT000195837	OTTHUMP00000022001	0	1	0	0	0	0	0	0	0	0	0	0	0	0	0	1
IPI00291928	P61106	Q0JTD5	ENSP00000238339	NP_057406	HIT000073807	OTTHUMP00000022008	13	7	8	5	9	9	6	5	14	15	15	12	3	2	4	8
IPI00219682	P27105		ENSP00000286713	NP_004090	HIT000302709	OTTHUMP00000022024	2	3	3	3	3	4	0	0	3	4	3	3	0	1	1	1
IPI00219034	P51970	Q5VZ50	ENSP00000238369	NP_055037	HIT000298371	OTTHUMP00000022034	13	11	9	7	24	23	10	7	19	18	10	17	10	12	7	5
IPI00016702		Q6ZMY1	ENSP00000344404	NP_036329	HIT000249737	OTTHUMP00000022081	0	0	0	0	1	1	0	0	0	0	0	0	0	0	0	0
IPI00414554		Q7Z523	ENSP00000259477	NP_112240	HIT000012788	OTTHUMP00000022110	8	5	3	3	13	9	18	9	5	8	6	2	2	3	0	1
IPI00031115	Q92805	Q59HA1	ENSP00000259462	NP_002068	HIT000220219	OTTHUMP00000022117	0	0	0	0	0	0	0	0	1	0	0	0	0	0	0	0
IPI00012970	O00743	Q5U0A2	ENSP00000238362	NP_002712	HIT000032970	OTTHUMP00000022122	0	0	0	0	0	0	0	0	0	0	0	3	0	0	1	0
IPI00003362	P11021	Q2KHP4	ENSP00000265959	NP_005338	HIT000038771	OTTHUMP00000022124	35	19	44	25	57	54	41	43	37	44	54	54	23	17	13	19
IPI00552643	Q9H7P6	Q9H7N7	ENSP00000353149	NP_258257	HIT000029362	OTTHUMP00000022151	0	0	0	0	0	0	0	0	3	0	1	0	0	0	0	0
IPI00175472		Q5JU67	ENSP00000318301		HIT000019803	OTTHUMP00000022194	0	0	0	1	0	0	0	0	0	0	0	0	0	0	0	0
IPI00046057	P61764	Q5JU62	ENSP00000259377	NP_003156	HIT000061754	OTTHUMP00000022196	5	7	3	0	2	2	2	2	4	3	2	7	0	0	3	0
IPI00084828	P61764	Q59GC9	ENSP00000362396	NP_001027392		OTTHUMP00000022197		0	0	0	0	8	8	7	6	4	8	6	7	2	3	9	75
IPI00303568	Q9H7Z7	Q0JVL7	ENSP00000345341	NP_079348	HIT000035330	OTTHUMP00000022231	3	0	0	1	2	3	2	0	4	1	2	4	0	0	0	0
IPI00552861		Q5SYX2	ENSP00000345680	NP_004399		OTTHUMP00000022236		107	95	106	90	81	88	66	73	52	90	72	88	57	55	40	1208
IPI00657691		Q5SYX0				OTTHUMP00000022237		15	3	4	2	6	2	3	4	10	10	7	10	2	3	0	82
IPI00024151	O95900		ENSP00000300450	NP_056494	HIT000247750	OTTHUMP00000022257	1	0	0	0	0	0	0	0	0	0	0	0	0	0	0	0
IPI00413728	Q13813	Q9UG16	ENSP00000346512	NP_003118		OTTHUMP00000022283		5	2	2	2	12	8	6	8	5	6	1	3	1	1	3	67
IPI00301311	Q01105	Q6FHZ5	ENSP00000361767	NP_003002		OTTHUMP00000022286		2	0	7	4	8	14	9	5	6	8	7	7	1	3	4	89
IPI00007165	Q9UPQ8	Q5SRE6	ENSP00000309960	NP_055723	HIT000000811	OTTHUMP00000022307	0	1	0	0	0	0	0	0	0	0	0	0	0	0	0	0
IPI00002070	Q8IWT6	Q96SW8	ENSP00000259324	NP_062540	HIT000053623	OTTHUMP00000022308	1	0	0	1	1	0	0	0	0	0	1	2	0	0	0	0
IPI00002523	Q16773		ENSP00000302227	NP_004050		OTTHUMP00000022311		0	0	0	0	0	0	0	0	0	2	1	0	0	1	0	4
IPI00329410	Q86YN1		ENSP00000300477	NP_065171	HIT000259060	OTTHUMP00000022326	0	0	0	0	0	1	0	0	0	0	0	0	0	0	0	0
IPI00477616	Q15257	Q53GZ3	ENSP00000266101	NP_066954	HIT000035324	OTTHUMP00000022333	9	3	3	4	11	9	8	10	8	5	8	10	7	4	11	12
IPI00102670		Q3MIN8	ENSP00000334261	NP_055848	HIT000000271	OTTHUMP00000022353	0	0	0	0	1	0	0	0	0	0	0	0	2	3	2	0
IPI00219110	P62166		ENSP00000223979	NP_055101	HIT000242722	OTTHUMP00000022356	4	2	2	0	5	5	7	5	6	10	12	11	0	2	0	2
IPI00553107		Q5JT02	ENSP00000361294			OTTHUMP00000022413	0	0	0	0	0	0	0	0	0	0	0	0	0	0	1	0
IPI00161966		O60270	ENSP00000292015			OTTHUMP00000022414	0	0	0	0	0	0	0	0	0	0	1	0	0	0	0	0
IPI00741537		Q5H9R5	ENSP00000349856		HIT000306748	OTTHUMP00000022417	0	0	0	0	0	0	0	1	0	0	0	0	0	0	0	0
IPI00480027		Q5T8A7	ENSP00000349274	NP_055626	HIT000000374	OTTHUMP00000022537	0	0	0	0	0	1	0	0	0	0	0	0	0	1	0	0
IPI00166749	Q10713	Q5SXM9	ENSP00000298536	NP_055975	HIT000041803	OTTHUMP00000022572	0	0	1	0	1	2	0	0	2	2	2	1	0	0	0	0
IPI00514356		Q5SXN7				OTTHUMP00000022581		1	0	0	0	0	0	0	0	0	0	0	0	0	0	0	1
IPI00299977	Q9NRX4	Q0JSG6	ENSP00000247665	NP_054891		OTTHUMP00000022619		5	4	2	1	3	4	5	4	5	3	2	2	3	2	2	49
IPI00217553		Q8IXM3	ENSP00000328046	NP_115866	HIT000052305	OTTHUMP00000022696	0	0	0	0	0	0	0	0	0	0	1	0	0	0	0	0
IPI00022429	P02763	Q5T539	ENSP00000259396	NP_000598		OTTHUMP00000022741		0	0	4	1	5	5	0	0	0	2	6	9	2	2	5	42
IPI00020091	P19652	Q5T538	ENSP00000259397	NP_000599	HIT000259530	OTTHUMP00000022746	0	0	0	0	0	0	0	0	0	0	0	0	0	1	0	0
IPI00025285	O75348	Q6IB33	ENSP00000259415	NP_004879	HIT000001721	OTTHUMP00000022758	1	0	0	0	2	0	0	0	0	0	2	2	0	0	0	0
IPI00297113	Q13049		ENSP00000238349	NP_036342	HIT000031472	OTTHUMP00000022763	1	1	0	0	0	0	0	0	0	0	0	0	0	0	0	0
IPI00401283	Q9H1U4		ENSP00000223618	XP_376905	HIT000000335	OTTHUMP00000022793	0	0	0	0	0	0	0	0	0	1	0	0	0	0	0	0
IPI00003217	Q99436	Q5TBG6	ENSP00000259457	NP_002790	HIT000101415	OTTHUMP00000022798	1	1	2	0	1	0	1	3	2	1	2	2	2	0	0	1
IPI00291467	P12236	Q59EI9	ENSP00000306222	NP_001627	HIT000295353	OTTHUMP00000022826	39	41	32	20	28	22	19	15	13	14	27	28	6	5	6	3
IPI00006203	O96006		ENSP00000305414	NP_004720		OTTHUMP00000022839		1	0	0	0	0	0	0	0	0	0	0	0	1	0	0	2
IPI00643531			ENSP00000370570			OTTHUMP00000022845	0	0	0	1	0	0	0	0	0	0	0	0	1	0	0	0
IPI00008405	P54793		ENSP00000351220	NP_004033	HIT000325021	OTTHUMP00000022857	0	0	0	0	0	1	0	0	0	0	0	0	0	0	0	0
IPI00012347		Q6P1M7	ENSP00000217939	NP_056234	HIT000074922	OTTHUMP00000022860	0	0	0	0	0	0	0	1	0	0	0	0	0	0	0	0
IPI00023406	P53701	Q68D50	ENSP00000326579	NP_005324	HIT000022669	OTTHUMP00000022903	0	0	2	0	0	0	0	0	0	0	0	0	0	0	0	0
IPI00013421	Q13491	Q0JS56	ENSP00000050379	NP_005269		OTTHUMP00000022946		0	0	0	0	0	0	0	1	0	0	0	0	0	0	0	1
IPI00187158		Q59FD5	ENSP00000316861	NP_001001995		OTTHUMP00000022947		1	2	6	2	4	3	4	2	2	6	5	6	5	2	4	56
IPI00012575	O00625	Q6FHD2	ENSP00000262698	NP_001018119	HIT000325368	OTTHUMP00000022961	0	0	0	0	2	2	0	0	1	0	2	0	0	0	1	2
IPI00026881	P30550		ENSP00000246237	NP_005305	HIT000196266	OTTHUMP00000022983	0	0	0	0	0	0	1	0	0	0	0	0	0	0	0	0
IPI00552530		Q5JP01	ENSP00000369425			OTTHUMP00000022991	0	0	0	1	0	0	0	0	0	1	0	0	0	0	0	0
IPI00306301	P08559	Q53GE3	ENSP00000254142	NP_000275	HIT000288959	OTTHUMP00000023015	18	9	13	9	20	16	13	19	16	17	22	22	6	7	4	3
IPI00011937	Q13162		ENSP00000319964	NP_006397	HIT000037681	OTTHUMP00000023056	0	0	0	1	2	0	0	0	0	0	0	0	0	0	0	0
IPI00031691	P32969	Q53Z07	ENSP00000330879	NP_000652	HIT000050237	OTTHUMP00000023060	5	4	4	4	2	5	3	5	0	0	0	0	0	0	2	1
IPI00297982	P41091	Q2VIR3	ENSP00000253039	NP_001406	HIT000038713	OTTHUMP00000023076	1	0	1	0	1	1	0	0	0	0	1	2	0	0	0	1
IPI00014849	Q15120		ENSP00000322522	NP_005382	HIT000285421	OTTHUMP00000023083	1	1	0	0	3	0	0	0	7	6	2	5	0	0	1	3
IPI00289940	O15480		ENSP00000355198	NP_002356	HIT000014055	OTTHUMP00000023099	0	0	0	0	0	0	0	0	0	0	0	0	0	0	0	1
IPI00413006			ENSP00000317298	XP_001131354		OTTHUMP00000023105		0	0	0	0	0	0	0	0	1	0	0	0	0	0	0	1
IPI00215637	O00571	Q59GX6	ENSP00000244357	NP_001347	HIT000061601	OTTHUMP00000023143	7	7	7	1	6	7	2	2	5	5	5	6	0	0	2	0
IPI00335131		Q5VT18	ENSP00000347218			OTTHUMP00000023159	0	0	0	0	2	3	3	2	1	0	0	0	0	0	0	0
IPI00008483	P21397	Q49A63	ENSP00000340684	NP_000231	HIT000196193	OTTHUMP00000023165	5	1	3	1	7	5	4	5	3	2	3	5	2	2	1	2
IPI00328156	P27338	Q8TBI1	ENSP00000265833	NP_000889	HIT000196220	OTTHUMP00000023166	11	7	9	6	16	17	15	15	8	9	20	16	11	16	18	8
IPI00217081		Q8IVP5	ENSP00000265830	NP_776155	HIT000052741	OTTHUMP00000023173	1	0	1	0	1	0	0	1	0	2	1	1	0	0	0	0
IPI00644732		Q590H7				OTTHUMP00000023176		1	0	0	1	0	0	0	0	0	0	0	0	0	0	0	2
IPI00645078	P22314	Q5JRR8	ENSP00000338413	NP_003325	HIT000036096	OTTHUMP00000023197	46	26	33	23	31	45	46	39	41	65	65	60	45	39	65	45
IPI00300568	P17600		ENSP00000263237	NP_008881		OTTHUMP00000023229		7	8	8	3	9	6	10	9	3	5	8	1	10	13	6	113
IPI00251507	P17600	Q5H9B0	ENSP00000343206	NP_598006	HIT000099014	OTTHUMP00000023230	7	10	9	9	6	5	7	4	6	5	8	0	3	11	5	3
IPI00017726	Q99714	Q6IBS9	ENSP00000168216	NP_004484	HIT000222808	OTTHUMP00000023348	6	2	2	3	6	3	2	1	11	12	14	11	4	6	3	3
IPI00179298		Q5H964	ENSP00000276009			OTTHUMP00000023360	0	1	0	0	0	0	0	2	0	0	0	0	0	0	0	1
IPI00056314		Q969E8	ENSP00000289479	NP_477511	HIT000301443	OTTHUMP00000023373	2	0	0	0	0	2	1	0	0	1	0	0	0	0	0	0
IPI00005132		Q9NVN8	ENSP00000338573	NP_061940	HIT000035400	OTTHUMP00000023374	0	0	0	0	0	0	0	0	0	1	0	0	0	0	0	0
IPI00219365	P26038	Q6PJT4	ENSP00000275995	NP_002435	HIT000037926	OTTHUMP00000023438	4	1	3	0	8	5	2	2	4	4	11	5	3	6	1	1
IPI00019148	P78318		ENSP00000337270	NP_001542	HIT000031724	OTTHUMP00000023464	0	0	0	0	1	0	1	0	0	0	1	0	0	0	0	0
IPI00647338		Q5JUW6	ENSP00000363475			OTTHUMP00000023476	1	0	0	0	0	0	0	0	0	0	0	0	0	0	0	0
IPI00552701		Q5JUW8	ENSP00000194900			OTTHUMP00000023477	3	0	0	1	2	2	1	0	1	1	0	0	0	0	0	0
IPI00304596	Q15233		ENSP00000276079	NP_031389	HIT000031450	OTTHUMP00000023506	0	0	1	1	2	5	4	5	1	2	3	1	3	4	2	1
IPI00006658	Q9Y237	Q3MHV0	ENSP00000218432	NP_006214	HIT000264246	OTTHUMP00000023526	0	0	2	0	0	1	0	1	0	0	0	0	1	0	0	0
IPI00217030	P62701	Q53HV1	ENSP00000352322	NP_000998	HIT000195867	OTTHUMP00000023537	2	2	2	3	2	4	0	1	0	4	2	2	0	1	0	0
IPI00238220		Q5QGS0	ENSP00000055682	NP_001008537	HIT000042441	OTTHUMP00000023576	0	0	0	0	0	0	0	1	0	0	0	0	0	0	0	0
IPI00169383	P00558	Q5J7W1	ENSP00000218265	NP_000282	HIT000059907	OTTHUMP00000023595	148	118	108	77	164	167	136	128	87	116	108	119	90	106	88	84
IPI00025318	O75368	Q3SYL1	ENSP00000253481	NP_003013	HIT000008166	OTTHUMP00000023609	8	7	8	3	13	9	5	8	12	13	11	8	9	11	10	7
IPI00007123	Q9UK32	Q6FHX2	ENSP00000262752	NP_055311	HIT000072887	OTTHUMP00000023618	0	0	0	0	0	1	0	0	0	0	0	0	0	0	0	0
IPI00394809	Q6UXV4	Q3KNU7	ENSP00000285313		HIT000049777	OTTHUMP00000023621	1	0	0	0	0	0	0	0	1	0	0	0	0	0	0	0
IPI00012474		Q53FP2	ENSP00000247381	NP_067650	HIT000007420	OTTHUMP00000023663	1	0	0	0	2	0	1	0	0	0	1	0	0	0	0	1
IPI00028376	O60220		ENSP00000247385	NP_004076	HIT000036998	OTTHUMP00000023681	1	1	3	0	3	4	0	1	1	1	4	2	0	0	0	0
IPI00026230	P55795		ENSP00000247376	NP_001027565	HIT000303916	OTTHUMP00000023682	7	4	5	4	3	6	5	5	3	3	4	3	3	3	3	2
IPI00009906	Q9UH62		ENSP00000338118	NP_057691	HIT000306837	OTTHUMP00000023688	0	0	0	0	0	0	0	1	0	1	0	0	1	0	0	0
IPI00478127	Q969E4		ENSP00000243286	NP_001006934	HIT000033909	OTTHUMP00000023757	5	1	6	1	2	2	3	2	5	0	0	0	0	0	1	0
IPI00219661	P60201		ENSP00000305152	NP_000524		OTTHUMP00000023761		46	42	27	15	46	45	91	79	33	28	40	44	230	316	395	1862
IPI00396968	P60201	Q5U0F2	ENSP00000354860	NP_955772	HIT000031078	OTTHUMP00000023762	0	0	0	0	0	0	0	1	0	0	0	0	1	0	1	1
IPI00014603	Q9NP90	Q52LX2	ENSP00000243298	NP_057454	HIT000059168	OTTHUMP00000023763	0	0	0	0	0	0	0	0	0	0	0	1	0	0	0	0
IPI00376833		Q5H9E4	ENSP00000322538	NP_001012773	HIT000028521	OTTHUMP00000023764	0	0	0	0	0	0	0	1	0	0	0	0	0	0	0	0
IPI00027998	P57739		ENSP00000298115	NP_065117	HIT000264567	OTTHUMP00000023793	0	0	0	0	0	0	0	0	0	0	0	1	0	0	0	0
IPI00064201		Q5JV73	ENSP00000276185	XP_042978	HIT000001532	OTTHUMP00000023806	0	1	0	0	0	0	0	0	0	0	0	0	0	0	0	0
IPI00219616	P60891	Q5JV75	ENSP00000276174	NP_002755	HIT000321498	OTTHUMP00000023807	3	2	4	2	8	4	4	3	5	4	3	0	0	1	3	2
IPI00216694	P13797	Q53GY0	ENSP00000289290	NP_005023	HIT000259623	OTTHUMP00000023876	2	0	1	2	4	8	3	2	2	2	1	2	4	4	6	5
IPI00029486	P50052	Q6UVH2	ENSP00000325962	NP_000677	HIT000268839	OTTHUMP00000023878	0	0	0	0	0	0	0	0	0	0	0	0	0	0	0	1
IPI00220739	O00264	Q6IB11	ENSP00000217971	NP_006658	HIT000282527	OTTHUMP00000023897	12	6	7	2	14	19	14	10	4	8	9	12	9	13	19	15
IPI00007343	O15541		ENSP00000245419	NP_008909	HIT000325057	OTTHUMP00000023925	0	0	0	0	0	0	0	0	0	0	0	0	0	1	0	0
IPI00303890	P98170		ENSP00000245836	NP_001158	HIT000041696	OTTHUMP00000023975	0	0	0	0	1	0	0	0	0	0	1	0	0	0	0	0
IPI00107113	Q9BVJ6		ENSP00000287286	NP_006640	HIT000034489	OTTHUMP00000023994	0	0	0	0	0	0	0	0	0	1	0	0	0	0	0	0
IPI00170744	Q99607		ENSP00000311280	NP_001412	HIT000037865	OTTHUMP00000024003	0	0	0	0	0	0	1	0	0	0	0	0	0	0	0	0
IPI00028517	Q14088	Q0P6J8	ENSP00000257017	NP_004785	HIT000100566	OTTHUMP00000024006	0	0	0	0	0	0	0	0	0	0	0	0	0	0	1	0
IPI00647043		Q5JX16	ENSP00000359933			OTTHUMP00000024033	0	0	0	0	0	0	0	0	1	1	0	0	0	0	0	0
IPI00009607	Q9Y3L5		ENSP00000340274	NP_067006	HIT000093860	OTTHUMP00000024036	0	0	0	0	0	0	0	0	0	1	0	0	0	0	0	0
IPI00232571	O75487	Q86SV6	ENSP00000262862	NP_001439	HIT000252551	OTTHUMP00000024052	0	1	0	0	0	0	0	0	0	0	0	0	0	1	0	0
IPI00218493	P00492	Q6LET3	ENSP00000355367	NP_000185	HIT000195436	OTTHUMP00000024061	30	19	17	17	18	21	20	18	21	25	27	24	13	11	15	16
IPI00304692	P38159		ENSP00000276230	NP_002130	HIT000032918	OTTHUMP00000024132	1	1	0	1	2	0	2	2	1	1	1	0	0	0	3	1
IPI00240510	P41225	Q15505	ENSP00000257018	NP_005625	HIT000323153	OTTHUMP00000024166	0	0	0	0	0	0	0	1	0	0	0	0	0	0	0	0
IPI00299085	O60732		ENSP00000285879	NP_005453		OTTHUMP00000024183		0	1	0	0	0	0	0	0	0	0	0	0	0	0	0	1
IPI00060801	Q96DA2	Q0JRZ2	ENSP00000286430	NP_741995	HIT000029190	OTTHUMP00000024247	2	0	0	1	0	1	0	0	0	0	1	1	0	0	0	0
IPI00334159	P61758	Q6FH24	ENSP00000286428	NP_003363	HIT000222849	OTTHUMP00000024252	4	1	1	1	8	4	4	2	3	4	4	5	3	3	3	0
IPI00019490	P19532		ENSP00000314129	NP_006512	HIT000040072	OTTHUMP00000024272	0	0	0	0	0	0	0	0	0	0	1	0	0	0	0	0
IPI00020072		Q9NUJ7	ENSP00000332833	NP_060860	HIT000004659	OTTHUMP00000024274	1	0	0	0	0	0	0	0	0	0	0	0	0	0	0	0
IPI00007188	P05141	Q6NVC0	ENSP00000005593	NP_001143	HIT000054137	OTTHUMP00000024324	5	0	3	1	6	3	4	2	0	4	10	7	2	0	0	1
IPI00028003	P24311		ENSP00000253484	NP_001857	HIT000326503	OTTHUMP00000024326	0	1	1	0	0	0	0	0	0	0	0	0	0	0	0	0
IPI00021435	P35998	Q3LIA5	ENSP00000292644	NP_002794	HIT000031017	OTTHUMP00000024424	4	2	1	0	5	3	4	3	4	3	2	3	0	1	0	2
IPI00301987		O75216	ENSP00000339881	NP_061878	HIT000263069	OTTHUMP00000024433	0	0	0	1	0	0	0	0	0	0	0	0	0	0	0	0
IPI00018873	P43490		ENSP00000222553	NP_005737	HIT000217435	OTTHUMP00000024449	4	2	3	0	3	8	4	2	2	7	3	2	0	0	0	1
IPI00027626	P40227	Q3KP28	ENSP00000275603	NP_001753	HIT000078722	OTTHUMP00000024460	8	2	5	1	4	8	1	2	14	13	13	8	3	3	5	1
IPI00220642	P61981		ENSP00000306330	NP_036611	HIT000039050	OTTHUMP00000024480	82	62	59	55	77	82	70	75	96	115	123	106	48	52	70	64
IPI00294158	P53004		ENSP00000265523	NP_000703	HIT000033805	OTTHUMP00000024485	3	2	0	0	1	1	2	2	3	1	3	2	0	0	0	0
IPI00103869	Q8WZ74	Q20BG7	ENSP00000160373	NP_219499	HIT000078587	OTTHUMP00000024498	0	0	0	1	2	1	0	0	0	0	0	0	0	0	0	0
IPI00000837	Q14832		ENSP00000355316	NP_000831	HIT000323639	OTTHUMP00000024502	4	4	2	2	8	11	7	8	6	7	0	1	1	1	0	0
IPI00008569		O15498	ENSP00000223369	NP_006546	HIT000033143	OTTHUMP00000024507	0	0	0	0	2	0	3	3	1	0	1	1	1	1	0	0
IPI00375138			ENSP00000370281	XP_944377		OTTHUMP00000024513		0	0	0	0	0	0	0	0	0	0	0	0	1	0	0	1
IPI00007776	O94805		ENSP00000160382	NP_057272	HIT000278560	OTTHUMP00000024514	1	0	0	0	0	0	0	0	0	0	0	0	0	0	0	0
IPI00297579	Q13185		ENSP00000336687	NP_009207	HIT000030026	OTTHUMP00000024529	0	0	0	0	1	1	3	2	0	0	1	0	0	1	0	0
IPI00016077	O75323	Q53X96	ENSP00000313050	NP_001474	HIT000062996	OTTHUMP00000024550	5	2	2	1	6	2	5	2	1	3	10	3	0	0	1	1
IPI00386731	Q96ME1		ENSP00000371805			OTTHUMP00000024583	1	0	0	0	2	1	0	0	2	1	0	1	0	0	0	0
IPI00019642	Q9UDT6		ENSP00000223398	NP_003379		OTTHUMP00000024598		4	1	2	1	10	7	0	5	7	7	5	4	1	2	2	59
IPI00007052	Q9Y3D6		ENSP00000223136	NP_057152		OTTHUMP00000024652		3	0	1	1	3	3	4	4	1	1	2	0	1	2	2	30
IPI00013297	Q13442		ENSP00000222968	NP_055706	HIT000029833	OTTHUMP00000024656	2	0	1	1	2	2	1	1	0	1	0	3	0	2	0	0
IPI00004488	Q16864	Q6IBA8	ENSP00000249289	NP_004222	HIT000101512	OTTHUMP00000024661	8	4	6	6	8	7	11	8	17	10	9	15	3	4	5	5
IPI00007084	Q9UJS0	Q53GR7	ENSP00000265631	NP_055066	HIT000070188	OTTHUMP00000024692	0	0	0	0	0	1	0	0	0	0	1	0	0	0	0	0
IPI00072224	Q6NUQ1		ENSP00000257700	NP_068749	HIT000263040	OTTHUMP00000024700	0	0	0	0	1	0	0	0	0	0	0	0	0	0	0	0
IPI00641986		O94871	ENSP00000314156	NP_055505		OTTHUMP00000024703		0	1	2	0	1	3	3	3	1	0	0	0	0	0	0	14
IPI00748841			ENSP00000353728	XP_001128747	HIT000266235	OTTHUMP00000024725	0	0	0	1	0	0	0	0	0	0	0	0	0	0	0	0
IPI00162199		Q7Z6L1	ENSP00000369121	NP_056210	HIT000053931	OTTHUMP00000024735	0	0	0	0	0	0	0	0	1	2	0	0	1	0	0	0
IPI00413641	P15121	O15289	ENSP00000285930	NP_001619	HIT000029468	OTTHUMP00000024737	2	0	2	0	1	0	0	1	4	3	11	4	1	1	2	2
IPI00033217	Q9UDR5		ENSP00000351834	NP_005754	HIT000074523	OTTHUMP00000024755	0	0	0	0	1	0	0	0	0	0	1	0	0	0	0	0
IPI00427330	Q9Y3A5		ENSP00000246868	NP_057122	HIT000084931	OTTHUMP00000024783	0	0	0	0	1	0	0	0	0	0	0	0	0	0	1	0
IPI00014310	Q13616	Q0JSS1	ENSP00000326804	NP_003583	HIT000065252	OTTHUMP00000024785	0	0	0	0	0	0	1	0	2	1	1	1	0	0	0	0
IPI00290827		Q53GB1	ENSP00000344831	NP_061331	HIT000289701	OTTHUMP00000024790	1	0	0	0	0	0	0	0	0	0	0	0	0	0	0	0
IPI00152949		Q0JTC2	ENSP00000323068	NP_071929	HIT000008756	OTTHUMP00000024799	0	0	0	0	0	0	0	0	0	0	0	0	0	1	0	0
IPI00020926	Q00056		ENSP00000353151	NP_002132	HIT000196311	OTTHUMP00000024831	0	0	0	1	0	0	0	0	0	0	0	0	0	1	0	0
IPI00025512	P04792	Q96C20	ENSP00000248553	NP_001531	HIT000285403	OTTHUMP00000024846	7	4	18	13	11	11	7	9	2	5	8	7	25	22	20	13
IPI00069058		Q9UDW8	ENSP00000249330	NP_003369	HIT000261211	OTTHUMP00000024858	11	5	14	14	8	5	14	9	9	14	16	11	2	1	2	1
IPI00005516	Q9HBW1	Q14DU9	ENSP00000249363	NP_071426	HIT000073683	OTTHUMP00000024859	0	1	0	0	0	0	0	0	0	0	0	0	0	0	0	0
IPI00215919	P84085		ENSP00000000233	NP_001653	HIT000303708	OTTHUMP00000024864	0	0	0	0	0	0	0	0	1	2	1	0	0	1	1	2
IPI00069823		Q96PP4	ENSP00000348996	NP_443165	HIT000018196	OTTHUMP00000024877	0	0	0	0	0	0	0	1	0	0	0	0	0	0	0	0
IPI00008894	Q9UI42		ENSP00000222482	NP_057436	HIT000068436	OTTHUMP00000024881	0	0	0	0	0	0	0	0	0	0	0	0	0	1	0	3
IPI00011676	O00401	Q68DE4	ENSP00000223023	NP_003932	HIT000053836	OTTHUMP00000024882	0	0	0	0	0	2	0	0	1	1	2	1	0	0	0	0
IPI00303797	P15056	Q3MIN6	ENSP00000288602	NP_004324	HIT000196904	OTTHUMP00000024903	0	0	0	0	0	1	0	0	0	0	0	1	0	0	0	0
IPI00647714						OTTHUMP00000024909	0	1	0	0	0	0	0	0	0	0	0	0	0	0	0	0
IPI00011735	O00458	Q75M98	ENSP00000005558	NP_001007246	HIT000030278	OTTHUMP00000024911	0	0	0	0	0	0	0	0	0	0	0	0	1	0	0	0
IPI00140420	Q7KZF4	Q59FF0	ENSP00000346762	NP_055205	HIT000037857	OTTHUMP00000024914	2	1	0	0	3	1	2	2	1	1	5	2	0	0	0	0
IPI00011694	P07477	Q45KI0	ENSP00000290968	NP_002760		OTTHUMP00000024975		1	0	0	0	0	0	0	0	1	0	0	0	0	0	0	2
IPI00177476		Q7Z695	ENSP00000072869	NP_443085	HIT000070750	OTTHUMP00000024994	0	0	1	0	0	0	0	0	0	0	0	0	0	0	0	0
IPI00009992	O75689		ENSP00000265846	NP_006860	HIT000242186	OTTHUMP00000024998	1	2	2	1	4	2	1	3	4	1	2	0	1	1	0	1
IPI00395903	Q9NUM4	Q8N353	ENSP00000336673	NP_060844	HIT000042023	OTTHUMP00000024999	0	0	0	0	0	0	0	0	0	1	0	0	0	0	0	0
IPI00219673	Q9Y2Q3	Q0JSA7	ENSP00000351181	NP_057001	HIT000025534	OTTHUMP00000025002	5	1	1	0	3	0	2	2	1	0	0	1	1	0	0	0
IPI00009236	Q03135	Q2TNI1	ENSP00000339191	NP_001744	HIT000034504	OTTHUMP00000025031	1	0	0	0	1	0	2	1	0	0	1	1	0	2	0	0
IPI00013891	Q13595	Q549U1	ENSP00000297071	NP_037425	HIT000242185	OTTHUMP00000025033	0	0	0	0	0	0	0	0	0	1	0	0	0	0	0	0
IPI00031510	Q14563	Q75MQ2	ENSP00000265362	NP_006071	HIT000192656	OTTHUMP00000025061	0	0	0	0	0	0	0	1	0	0	0	0	0	0	0	0
IPI00015833	Q9NX63		ENSP00000262570	NP_060282	HIT000048804	OTTHUMP00000025085	4	1	2	0	1	6	3	5	9	4	11	7	0	0	0	0
IPI00015911	P09622	Q59EV8	ENSP00000205402	NP_000099	HIT000191161	OTTHUMP00000025117	47	33	37	25	43	34	31	25	39	34	46	36	23	24	21	22
IPI00026946	P47972		ENSP00000265634	NP_002514	HIT000093834	OTTHUMP00000025120	0	0	0	0	0	0	0	0	0	0	0	0	0	0	1	0
IPI00303280	Q9NZW5		ENSP00000222644	NP_057531	HIT000025432	OTTHUMP00000025125	0	0	0	0	0	0	0	0	1	0	0	0	0	0	0	0
IPI00409635		Q69YJ2	ENSP00000251527	NP_065779	HIT000000944	OTTHUMP00000025126	1	0	2	0	4	3	2	0	1	3	0	1	1	0	1	0
IPI00011916	Q13155	Q75MR1	ENSP00000223029	NP_006294	HIT000275410	OTTHUMP00000025129	2	0	0	0	0	0	0	0	1	0	0	1	0	0	0	0
IPI00009904	P13667	Q549T6	ENSP00000286091	NP_004902	HIT000035427	OTTHUMP00000025137	1	0	0	0	0	2	1	1	3	1	2	2	2	0	0	0
IPI00019353		Q53H12	ENSP00000347581	NP_060708	HIT000004178	OTTHUMP00000025155	5	1	2	2	5	2	0	2	5	6	5	3	0	0	1	1
IPI00465315	P99999	Q0JT63	ENSP00000307786	NP_061820	HIT000026606	OTTHUMP00000025168	52	34	35	28	39	33	29	31	22	32	26	26	19	16	18	12
IPI00031564	O75223		ENSP00000275428	NP_076956	HIT000029784	OTTHUMP00000025183	0	0	0	0	0	1	0	0	1	0	0	0	0	0	0	0
IPI00098902	Q02218	Q9UDX0	ENSP00000222673	NP_002532	HIT000100430	OTTHUMP00000025189	33	16	13	7	23	30	21	22	26	25	35	31	12	7	9	7
IPI00029744	Q04837	Q567R6	ENSP00000265304	NP_003134	HIT000075998	OTTHUMP00000025194	8	4	4	2	5	5	4	7	5	11	15	8	2	2	2	3
IPI00045051	Q96QR8		ENSP00000275523	NP_150093	HIT000083580	OTTHUMP00000025196	7	1	5	1	6	5	5	4	4	1	3	3	0	1	2	1
IPI00029533	P26012	Q9BUG9	ENSP00000222573	NP_002205	HIT000196281	OTTHUMP00000025212	0	0	0	0	0	0	0	0	0	0	2	2	0	0	0	0
IPI00333068	Q92747	Q53GB6	ENSP00000262942	NP_006400	HIT000095831	OTTHUMP00000025213	9	3	2	0	7	6	3	3	2	4	9	6	1	3	1	0
IPI00304962	P08123	Q13897	ENSP00000297268	NP_000080	HIT000191158	OTTHUMP00000025225	9	8	4	6	20	15	6	6	7	2	8	5	7	11	6	4
IPI00003348	P62879	Q6FHM2	ENSP00000305260	NP_005264	HIT000035769	OTTHUMP00000025228	45	27	39	21	46	47	32	27	44	37	54	60	23	21	27	24
IPI00740420	Q9Y6V0	Q32P40	ENSP00000374128		HIT000000276	OTTHUMP00000025241	1	0	0	1	0	0	0	0	0	0	0	0	0	0	0	0
IPI00018889	P10071	Q17RW4	ENSP00000265526	NP_000159	HIT000195828	OTTHUMP00000025248	0	0	0	0	0	0	0	0	0	0	0	1	0	0	0	0
IPI00031651		Q9BRJ6	ENSP00000350011	NP_115726	HIT000243600	OTTHUMP00000025260	0	0	0	0	0	0	0	0	0	0	0	0	0	1	0	0
IPI00292793		Q9P1T6	ENSP00000257724	NP_951038	HIT000064552	OTTHUMP00000025265	0	0	0	0	1	0	0	0	0	0	0	0	0	0	0	0
IPI00166079	Q8N0U8		ENSP00000353998	NP_775788	HIT000056278	OTTHUMP00000025296	0	0	0	0	0	0	0	0	0	2	4	2	0	0	0	0
IPI00419585	P62937	Q3KQW3	ENSP00000348240	NP_066953	HIT000049372	OTTHUMP00000025305	79	74	62	42	115	110	109	107	34	66	68	101	51	49	61	60
IPI00017373	P35244		ENSP00000223129	NP_002938	HIT000034629	OTTHUMP00000025366	0	0	0	0	0	0	0	0	0	1	0	2	0	0	0	0
IPI00411637	Q96RP7	Q59GG5	ENSP00000353142	NP_078913	HIT000077161	OTTHUMP00000025373	0	0	0	0	0	0	0	0	0	0	0	0	0	0	0	1
IPI00163230	Q7L5N1		ENSP00000304102	NP_006824	HIT000271661	OTTHUMP00000025381	0	0	0	0	0	0	0	0	0	1	0	1	0	0	1	0
IPI00032995	Q9NS86	Q6NSL4	ENSP00000254770	NP_061167	HIT000246431	OTTHUMP00000025397	12	2	9	4	16	7	14	9	19	13	14	9	2	3	4	5
IPI00016669	Q15382	Q53Y56	ENSP00000262187	NP_005605	HIT000045319	OTTHUMP00000025423	0	0	1	0	0	0	0	0	0	0	0	0	0	0	0	0
IPI00291006	P40926	Q6FHZ0	ENSP00000327070	NP_005909	HIT000271965	OTTHUMP00000025445	152	157	152	146	164	163	144	144	114	127	147	150	119	127	135	114
IPI00021008	P35869		ENSP00000242057	NP_001612	HIT000264038	OTTHUMP00000025446	0	0	0	1	0	0	0	0	0	0	0	0	0	0	0	0
IPI00217391		Q75MG7	ENSP00000297293	NP_055731	HIT000000796	OTTHUMP00000025452	0	0	0	0	0	0	0	0	0	0	0	0	0	0	1	0
IPI00011770	O00483		ENSP00000339720	NP_002480	HIT000270254	OTTHUMP00000025498	13	4	7	8	4	6	3	8	7	8	2	9	7	6	8	4
IPI00554681	Q16718		ENSP00000347988	NP_004991	HIT000029938	OTTHUMP00000025499	23	15	23	7	35	31	22	25	21	21	20	15	14	24	10	8
IPI00554752	P31323	O60380	ENSP00000265717	NP_002727	HIT000195404	OTTHUMP00000025511	33	24	20	16	25	19	16	13	12	27	32	27	7	9	4	5
IPI00009355	Q9H0J9		ENSP00000263549	NP_073587	HIT000265930	OTTHUMP00000025530	0	0	0	0	0	0	1	0	0	0	0	0	0	0	0	0
IPI00219622	P25787	Q53GF5	ENSP00000223321	NP_002778	HIT000053207	OTTHUMP00000025534	7	2	3	3	6	4	1	2	4	3	3	2	1	0	0	0
IPI00023530	Q00535	Q6IAW3	ENSP00000297518	NP_004926	HIT000032219	OTTHUMP00000025538	0	0	1	0	1	2	0	2	2	0	1	1	0	1	2	0
IPI00218570	P15259		ENSP00000297283	NP_000281	HIT000264972	OTTHUMP00000025559	0	0	0	0	0	0	0	0	0	0	0	0	0	1	0	1
IPI00024689	P29972	Q6JSD7	ENSP00000311165	NP_932766	HIT000296455	OTTHUMP00000025562	0	0	0	0	0	0	0	0	0	0	0	0	8	13	10	8
IPI00470766		Q5VU96	ENSP00000294794	NP_056256	HIT000262519	OTTHUMP00000025712	0	1	0	0	0	0	0	0	0	0	0	0	0	0	0	0
IPI00020273	P78508	Q547K1	ENSP00000318798	NP_002232	HIT000042053	OTTHUMP00000025748	1	0	0	0	0	0	0	0	0	0	1	0	0	0	0	0
IPI00056478	Q969P0		ENSP00000316664	NP_443100		OTTHUMP00000025751		25	9	18	9	21	32	30	42	31	24	14	24	13	21	18	347
IPI00016600	P41732	Q7Z2D9	ENSP00000286824	NP_004606	HIT000059852	OTTHUMP00000025758	3	1	5	1	7	9	6	7	6	6	7	6	2	2	2	2
IPI00009730	Q9NPA3		ENSP00000338706	NP_067065	HIT000038644	OTTHUMP00000025759	0	0	0	0	0	0	0	1	0	0	0	0	0	0	0	0
IPI00016988	Q9H1Z4	Q6NXG4	ENSP00000218056	NP_060353	HIT000077623	OTTHUMP00000025798	0	0	2	0	1	0	3	2	3	0	2	3	0	0	0	0
IPI00374568			ENSP00000055335	NP_149992	HIT000013523	OTTHUMP00000025837	1	0	0	0	0	0	0	0	1	0	0	0	0	0	0	0
IPI00146447		Q3ZAQ7	ENSP00000298664	NP_001017980	HIT000028508	OTTHUMP00000025870	0	0	0	0	0	0	0	0	1	0	1	0	0	0	0	0
IPI00288993	Q9BZD7		ENSP00000252316	NP_076987	HIT000077494	OTTHUMP00000025873	0	0	0	0	0	0	0	0	0	0	0	0	0	0	0	1
IPI00002897	P34903		ENSP00000262857	NP_000799	HIT000216016	OTTHUMP00000025897	0	0	0	0	0	1	0	0	0	1	0	0	0	0	0	0
IPI00005688	O15231		ENSP00000325307	NP_009081	HIT000325528	OTTHUMP00000025904	0	0	0	1	0	0	0	0	0	0	0	0	0	0	0	0
IPI00645935						OTTHUMP00000025941	0	0	0	0	0	0	0	0	0	0	1	0	0	0	0	0
IPI00155729	Q9ULL4		ENSP00000355029	NP_005384	HIT000000922	OTTHUMP00000025973	0	0	0	0	0	0	0	0	0	0	0	0	0	0	0	1
IPI00220150	P51553	Q0JTN7	ENSP00000217901	NP_004126	HIT000219707	OTTHUMP00000025985	12	7	11	6	8	7	3	2	17	11	10	14	4	3	4	1
IPI00221394	O60832	Q0JUW0	ENSP00000253127	NP_001354	HIT000065531	OTTHUMP00000026046	0	0	0	0	0	1	0	0	0	0	0	0	0	0	0	0
IPI00215610	Q00013	Q2TSB6	ENSP00000253131	NP_002427	HIT000196150	OTTHUMP00000026054	0	0	0	0	0	0	1	1	1	1	0	0	0	0	0	0
IPI00215928	P41208	Q0JU94	ENSP00000276365	NP_004335	HIT000036380	OTTHUMP00000026058	1	0	1	0	2	3	1	2	1	1	1	0	1	0	1	0
IPI00152491		Q8TCZ2	ENSP00000352451	NP_113650		OTTHUMP00000026059		2	0	1	0	2	1	2	2	6	10	10	6	2	3	2	50
IPI00001633	O43155		ENSP00000332879	NP_037363	HIT000000122	OTTHUMP00000027905	0	0	0	0	0	0	0	0	1	0	0	0	0	0	0	0
IPI00414231	Q7Z4F1	Q14CK7	ENSP00000352601	NP_054764	HIT000252443	OTTHUMP00000027918	0	1	0	0	0	1	0	0	0	0	0	0	0	0	0	0
IPI00029623	P60900	Q9BZ93	ENSP00000261479	NP_002782	HIT000271674	OTTHUMP00000027935	4	1	3	5	5	6	6	3	7	2	3	6	0	0	0	1
IPI00221090	Q9C0A1		ENSP00000258869	NP_207646	HIT000001478	OTTHUMP00000027952	1	0	0	0	0	0	0	0	0	0	0	0	0	0	0	0
IPI00027178	O75843	Q86U03	ENSP00000312442	NP_003908	HIT000058405	OTTHUMP00000027954	0	0	0	0	0	0	0	0	0	1	0	0	0	0	0	0
IPI00295469	O95741		ENSP00000216775	NP_006023	HIT000038235	OTTHUMP00000027965	2	0	1	0	8	12	8	6	16	9	8	4	2	0	0	0
IPI00025478	Q00978		ENSP00000313529	NP_006075	HIT000014924	OTTHUMP00000027979	0	0	0	0	0	0	1	0	0	0	0	0	0	0	0	0
IPI00017375	Q15436		ENSP00000306881	NP_006355	HIT000324969	OTTHUMP00000027985	3	4	3	3	1	2	2	2	3	3	2	4	0	2	1	1
IPI00384047	Q86SZ2	Q49AS8	ENSP00000330289		HIT000028091	OTTHUMP00000027987	0	0	0	0	0	0	0	0	0	0	0	1	0	0	0	0
IPI00719051	O00471	Q658M3	ENSP00000342100	NP_006535	HIT000221957	OTTHUMP00000028003	0	0	0	0	0	0	1	0	0	1	0	0	0	0	0	0
IPI00302690	Q9NZ32	Q53H79	ENSP00000374636	NP_060947	HIT000002335	OTTHUMP00000028014	1	0	1	0	3	0	2	2	1	4	1	1	0	1	3	3
IPI00024157	Q00688	Q53GD8	ENSP00000216330	NP_002004	HIT000037515	OTTHUMP00000028023	6	2	6	2	3	7	3	5	2	4	3	1	5	3	3	0
IPI00152990	Q96BY7		ENSP00000261834	NP_060506	HIT000048148	OTTHUMP00000028030	0	0	0	0	0	0	1	0	0	0	0	0	0	0	0	0
IPI00386591		Q96EM0	ENSP00000247194	NP_653182	HIT000014771	OTTHUMP00000028034	0	0	0	0	0	1	0	0	0	0	0	1	0	0	0	0
IPI00003971	Q16799	Q2L7A7	ENSP00000267484	NP_066959	HIT000192013	OTTHUMP00000028039	34	21	30	14	28	32	34	35	19	19	30	20	17	26	20	25
IPI00156982		Q63HM2	ENSP00000317396	NP_071940	HIT000020344	OTTHUMP00000028041	0	0	0	0	0	1	0	0	1	0	0	0	0	0	0	0
IPI00306205	O43506	Q6GTZ1	ENSP00000256389	NP_003805	HIT000039914	OTTHUMP00000028047	0	0	0	0	0	0	1	0	0	0	0	0	0	0	0	0
IPI00294212	Q92623		ENSP00000256367	XP_027236	HIT000042362	OTTHUMP00000028050	0	0	0	0	0	1	1	0	0	0	0	0	0	0	0	0
IPI00009345		Q9H669	ENSP00000333535			OTTHUMP00000028059	0	0	0	0	0	0	0	0	0	0	0	0	0	1	0	0
IPI00002133	Q9Y6A2	Q8N2B0	ENSP00000261835	NP_006659	HIT000039614	OTTHUMP00000028066	0	0	0	0	2	0	0	0	0	0	0	0	0	0	0	0
IPI00020777	Q9H367		ENSP00000351707		HIT000070708	OTTHUMP00000028069	0	0	0	0	0	0	0	0	0	0	0	1	0	0	0	0
IPI00004273	P49756	Q16083	ENSP00000261973	NP_067062	HIT000055763	OTTHUMP00000028087	0	0	1	0	0	0	0	0	0	0	0	0	0	0	0	0
IPI00333838	Q86TX2		ENSP00000311224	NP_001032238	HIT000266856	OTTHUMP00000028100	1	0	1	0	0	0	0	0	0	0	0	0	0	0	0	0
IPI00220906	P49753	Q3I5F8	ENSP00000238651	NP_006812		OTTHUMP00000028101		0	0	0	0	0	0	0	0	0	0	1	0	0	0	0	1
IPI00005685	Q8ND90	Q6IAP2	ENSP00000318914	NP_006020	HIT000077353	OTTHUMP00000028114	0	0	0	0	0	0	0	1	0	0	0	0	0	0	0	0
IPI00456969	Q14204		ENSP00000348965	NP_001367	HIT000000031	OTTHUMP00000028119	109	56	88	42	105	119	110	91	131	130	163	134	101	98	160	150
IPI00167515	Q8N8N7	Q3L8A4	ENSP00000267568	NP_689657		OTTHUMP00000028120		0	0	0	0	1	1	1	1	2	2	0	1	0	1	1	11
IPI00024990	Q02252	O43573	ENSP00000342564	NP_005580	HIT000041514	OTTHUMP00000028133	20	20	21	11	20	21	16	15	21	23	31	35	18	18	20	20
IPI00477763	Q9Y5S2	Q86TR8	ENSP00000355237	NP_006026	HIT000070596	OTTHUMP00000028140	0	2	0	0	0	5	1	0	2	3	6	3	0	1	0	1
IPI00301579	P61916	Q53HV6	ENSP00000238633	NP_006423	HIT000030970	OTTHUMP00000028144	0	0	0	0	0	0	0	0	0	0	1	0	1	0	3	5
IPI00028055	P49755	Q53GF9	ENSP00000303145	NP_006818	HIT000267064	OTTHUMP00000028160	1	2	0	1	1	2	4	2	1	2	4	0	0	0	0	1
IPI00100520	Q9UPI3	Q53ZT9	ENSP00000238667	NP_060261	HIT000251295	OTTHUMP00000028164	0	0	0	0	0	0	0	0	0	0	1	0	0	0	0	0
IPI00023068	Q9BY43	Q14D22	ENSP00000216822	NP_054888	HIT000266922	OTTHUMP00000028171	0	0	2	0	0	1	0	0	0	0	0	0	0	1	2	2
IPI00022664	Q92696	Q6FHF7	ENSP00000216840	NP_004572	HIT000031422	OTTHUMP00000028175	0	0	0	0	0	0	0	0	0	1	0	0	0	0	0	0
IPI00065063	Q96LJ7	Q0JSP5	ENSP00000288111	NP_612461	HIT000079346	OTTHUMP00000028176	1	1	2	0	1	0	0	0	0	0	2	0	0	0	0	0
IPI00398994		Q6P153	ENSP00000371994	XP_370756	HIT000001020	OTTHUMP00000028183	0	0	0	0	0	0	0	0	0	0	0	1	1	0	0	0
IPI00643286		Q6ZW71	ENSP00000336854	NP_064580	HIT000287343	OTTHUMP00000028185	3	1	1	2	0	2	0	0	2	1	3	6	0	0	0	0
IPI00337351	Q7Z553		ENSP00000349925	NP_878250	HIT000253288	OTTHUMP00000028200	0	0	0	2	0	0	0	0	0	0	0	0	0	0	0	0
IPI00328911	Q9ULT8	Q2KQ74	ENSP00000261312	NP_056197	HIT000000848	OTTHUMP00000028205	0	1	0	0	0	0	0	0	0	0	0	0	0	0	0	0
IPI00747147		Q86TR1	ENSP00000371609		HIT000267075	OTTHUMP00000028227	1	0	0	0	0	0	0	0	0	0	0	0	0	0	0	0
IPI00016458	Q9H9P8		ENSP00000267436	NP_079160		OTTHUMP00000028253		0	0	0	0	0	0	0	0	0	0	1	0	0	0	0	1
IPI00413344	Q9Y281	Q549N0	ENSP00000298159	NP_068733	HIT000071018	OTTHUMP00000028254	8	8	7	4	8	7	5	7	8	12	12	6	11	7	14	7
IPI00215911	P27695	Q5TZP7	ENSP00000216714	NP_001632	HIT000023418	OTTHUMP00000028259	1	0	2	0	0	3	1	0	0	3	2	1	3	2	2	4
IPI00017672	P00491	Q8N7G1	ENSP00000354532	NP_000261	HIT000320879	OTTHUMP00000028261	1	1	1	3	3	2	2	1	4	5	2	4	0	0	1	0
IPI00017816	Q99766		ENSP00000245448	NP_001003803	HIT000083892	OTTHUMP00000028264	2	1	0	0	0	0	0	0	0	0	0	1	0	0	0	0
IPI00103530	Q8WXF7	Q6IAK1	ENSP00000349534	NP_056999	HIT000079765	OTTHUMP00000028269	39	22	28	17	39	31	25	23	23	30	32	32	11	22	21	22
IPI00011126	P62191	Q53HB3	ENSP00000261303	NP_002793	HIT000029694	OTTHUMP00000028280	8	3	4	3	7	9	4	6	4	5	3	10	0	2	2	0
IPI00075248	P62158	Q96HY3	ENSP00000272298	NP_001734	HIT000053157	OTTHUMP00000028284	142	66	134	42	161	184	130	122	163	109	188	156	104	133	108	104
IPI00395887	Q9H3N1		ENSP00000267434	NP_110382	HIT000252684	OTTHUMP00000028287	1	1	2	2	0	1	0	0	0	0	0	0	0	0	0	0
IPI00014048	P07998	Q6ICS5	ENSP00000344193	NP_002924	HIT000279839	OTTHUMP00000028291	0	0	0	0	0	0	2	1	2	2	2	1	1	0	3	5
IPI00411520	Q7Z3D6	Q0JU16	ENSP00000256324		HIT000043405	OTTHUMP00000028300	4	5	8	7	5	7	4	10	5	5	4	4	6	5	0	0
IPI00218342	P11586		ENSP00000216605	NP_005947	HIT000191225	OTTHUMP00000028302	2	2	0	2	4	5	4	2	3	2	5	0	1	1	0	0
IPI00217777	P24278		ENSP00000261683	NP_008908	HIT000023011	OTTHUMP00000028304	0	1	0	0	0	0	0	0	0	0	0	0	0	0	0	0
IPI00307794	P24588	Q6PG46	ENSP00000315615	NP_004848	HIT000196767	OTTHUMP00000028306	3	0	1	0	1	2	4	3	5	2	5	2	0	0	0	0
IPI00006980	Q9Y224	Q549M8	ENSP00000261700	NP_057123	HIT000071670	OTTHUMP00000028307	2	1	9	1	3	2	3	3	3	5	4	5	3	4	1	2
IPI00184564	P59282	Q2VYF3	ENSP00000317595	NP_776245	HIT000084169	OTTHUMP00000028309	0	0	0	0	0	0	0	1	0	0	0	0	0	0	0	0
IPI00002612	Q9P2Y4	Q53Y57	ENSP00000354206	NP_057507	HIT000058430	OTTHUMP00000028314	0	1	0	0	0	0	0	0	0	0	0	0	0	0	0	0
IPI00007702	P54652	Q53XM3	ENSP00000247207	NP_068814	HIT000030626	OTTHUMP00000028319	0	0	0	0	0	0	5	2	2	1	13	8	21	17	20	22
IPI00016314	P43116	Q52LG8	ENSP00000245457	NP_000947	HIT000085693	OTTHUMP00000028321	0	0	0	0	0	0	0	0	0	0	0	1	0	0	0	0
IPI00003515	Q15643	Q6MZL5	ENSP00000267622	NP_004230	HIT000325708	OTTHUMP00000028325	0	0	1	0	0	0	0	0	0	0	0	0	0	1	0	0
IPI00386755	Q96HE7		ENSP00000352044	NP_055399	HIT000066492	OTTHUMP00000028328	3	1	3	0	2	3	1	1	3	2	3	7	0	0	0	0
IPI00021926	P62333		ENSP00000216407	NP_002797	HIT000032433	OTTHUMP00000028330	2	0	3	2	4	6	7	6	3	5	3	1	2	1	0	1
IPI00719073	Q9HCK8					OTTHUMP00000028338	1	0	0	0	0	0	0	0	0	0	0	0	0	0	0	0
IPI00022648	P55010	Q32Q19	ENSP00000216554	NP_001960	HIT000010207	OTTHUMP00000028366	2	3	0	0	2	2	1	2	4	1	3	1	1	3	0	2
IPI00022977	P12277	Q6FG40	ENSP00000299198	NP_001814	HIT000034729	OTTHUMP00000028370	905	792	854	648	837	883	737	802	633	749	871	797	710	736	669	600
IPI00646167		Q0P6C4		NP_115879		OTTHUMP00000028374		0	0	0	0	0	0	0	0	0	0	0	1	0	0	0	1
IPI00419507			ENSP00000352430			OTTHUMP00000028390	0	0	0	0	0	0	0	0	0	0	0	1	0	0	0	0
IPI00395649			ENSP00000339276		HIT000015588	OTTHUMP00000028391	1	0	0	1	0	0	0	0	1	0	0	0	0	0	0	0
IPI00001568	Q9Y5K8	Q6PJ05	ENSP00000216442	NP_057078	HIT000298564	OTTHUMP00000028402	3	5	9	2	8	11	7	8	3	9	6	8	4	6	3	0
IPI00219678	P05198	Q53XC0	ENSP00000256383	NP_004085	HIT000030955	OTTHUMP00000028404	0	0	0	0	0	1	1	1	0	1	0	0	0	2	2	1
IPI00553177	P01009	Q0PVP5	ENSP00000348068	NP_000286	HIT000266938	OTTHUMP00000028419	1	1	8	2	8	14	1	1	1	0	3	1	1	2	0	0
IPI00180625		Q2KHR7	ENSP00000251181	NP_055820	HIT000000101	OTTHUMP00000028432	3	3	4	3	7	6	3	5	4	3	3	2	4	3	5	3
IPI00550991	P01011	Q2TU87	ENSP00000261981	NP_001076		OTTHUMP00000028439		0	0	2	2	1	0	0	0	0	0	0	0	3	0	1	9
IPI00219036	Q9UPY3	Q5D0K4	ENSP00000343745	NP_085124	HIT000000645	OTTHUMP00000028446	0	1	0	0	0	0	0	0	0	0	0	0	0	0	0	0
IPI00412878	O95848		ENSP00000339175	NP_803877	HIT000096773	OTTHUMP00000028453	0	0	0	0	0	0	0	0	1	2	2	0	0	0	0	0
IPI00029041		O60342	ENSP00000321834	NP_056012	HIT000000319	OTTHUMP00000028457	0	0	0	0	0	2	0	0	0	0	0	0	0	0	0	0
IPI00006034	P52943	Q53FN1	ENSP00000328521	NP_001303	HIT000042072	OTTHUMP00000028464	5	2	9	7	9	13	13	15	8	7	10	7	9	8	14	7
IPI00398418			ENSP00000352771			OTTHUMP00000028477	0	0	0	0	0	0	2	0	0	0	1	1	0	0	0	0
IPI00030706	O95433		ENSP00000216479	NP_036243	HIT000245523	OTTHUMP00000028484	0	1	1	0	5	4	6	2	4	0	1	0	4	1	3	2
IPI00299193	P57105	Q49SH3	ENSP00000256366	NP_060843	HIT000301725	OTTHUMP00000028493	0	0	0	1	2	0	1	1	0	0	0	0	0	0	0	0
IPI00009922	Q9GZT3		ENSP00000238688	NP_112487	HIT000002454	OTTHUMP00000028494	0	0	0	0	1	0	0	0	1	0	0	0	0	0	0	0
IPI00160369	Q9NRD5	Q53HE0	ENSP00000349465	NP_001034672	HIT000250061	OTTHUMP00000028509	0	0	0	0	0	0	0	0	0	1	0	0	0	0	0	0
IPI00014240	Q15049	Q6NSL6	ENSP00000310375	NP_055981	HIT000044137	OTTHUMP00000028512	3	1	3	1	3	1	5	2	0	2	2	0	2	5	1	3
IPI00290916		Q1XAP1	ENSP00000300398	NP_689726	HIT000264069	OTTHUMP00000028520	0	0	0	0	0	0	0	0	0	0	0	1	0	0	0	0
IPI00643747		Q5THK1	ENSP00000331845			OTTHUMP00000028545	0	0	0	0	0	1	0	0	0	0	0	0	0	0	0	0
IPI00396634		Q5THZ5	ENSP00000351207	XP_371461	HIT000001387	OTTHUMP00000028561	0	0	0	0	0	0	0	0	0	0	1	0	0	0	0	0
IPI00291412	P49593	Q0VGL7	ENSP00000263212	NP_055449	HIT000042149	OTTHUMP00000028563	1	0	2	0	0	0	0	0	6	3	2	2	0	0	0	0
IPI00021347	P68036		ENSP00000344259	NP_003338	HIT000243813	OTTHUMP00000028564	6	3	5	2	5	5	6	6	5	4	6	6	5	6	5	3
IPI00026167	P55769	Q6FHM6	ENSP00000215956	NP_001003796	HIT000272199	OTTHUMP00000028582	0	0	0	0	0	0	0	1	0	0	0	0	0	0	0	0
IPI00306929	Q8IUG5	Q5TF64	ENSP00000334563	NP_115997	HIT000061245	OTTHUMP00000028584	0	0	0	0	0	0	0	0	0	0	0	0	0	0	1	0
IPI00292858	P19971		ENSP00000252029	NP_001944	HIT000289252	OTTHUMP00000028587	0	0	1	1	1	3	0	1	0	0	0	0	0	0	0	0
IPI00001636	Q9UBB4	Q9NTC6	ENSP00000252934	NP_037368	HIT000271035	OTTHUMP00000028591	4	0	1	1	2	3	3	2	0	1	1	1	0	0	1	1
IPI00021751	P12036	Q16070	ENSP00000311997	NP_066554	HIT000000562	OTTHUMP00000028592	25	18	8	1	16	12	21	17	24	18	23	15	50	68	40	32
IPI00419266	P56556	Q6FGW0	ENSP00000330937	NP_002481	HIT000031172	OTTHUMP00000028595	1	0	0	0	0	3	1	0	4	4	4	1	1	0	2	0
IPI00002355	Q9Y6J0	Q6PHY0	ENSP00000263119	NP_036427	HIT000065887	OTTHUMP00000028608	0	0	0	1	0	0	0	0	0	0	0	0	0	0	0	0
IPI00289204	Q9BZR6	Q0JTL6	ENSP00000043402	NP_075380	HIT000252341	OTTHUMP00000028609	0	0	0	0	0	0	0	0	0	0	1	1	0	0	0	0
IPI00550689		Q6IAI0	ENSP00000216038	NP_055121	HIT000037644	OTTHUMP00000028639	4	1	5	1	4	1	2	5	4	1	1	1	0	0	1	0
IPI00020985	Q09472	Q38HM2	ENSP00000263253	NP_001420	HIT000217430	OTTHUMP00000028668	0	0	0	0	0	0	0	0	0	0	0	0	0	0	0	1
IPI00216293	Q16762	Q53EW8	ENSP00000249042	NP_003303	HIT000034836	OTTHUMP00000028669	5	1	3	0	5	6	4	1	1	0	1	3	1	2	5	3
IPI00165360	P25325	Q2VEU0	ENSP00000342333	NP_001013454	HIT000273510	OTTHUMP00000028670	0	0	0	0	0	2	3	2	1	0	2	3	0	1	0	1
IPI00646909	Q9NY65	Q2M3N4	ENSP00000318575	NP_061816		OTTHUMP00000028689		2	4	3	2	2	4	4	5	10	15	11	7	2	1	8	86
IPI00011635	Q9BXK5		ENSP00000318883	NP_056182	HIT000267455	OTTHUMP00000028698	0	0	1	1	1	1	1	0	1	3	5	3	0	0	0	0
IPI00024111		Q6ICD0	ENSP00000342529	NP_056468	HIT000023416	OTTHUMP00000028699	0	1	0	0	0	0	0	0	0	0	0	0	0	0	0	0
IPI00019502	P35579	Q60FE2	ENSP00000216181	NP_002464	HIT000242559	OTTHUMP00000028706	24	9	18	10	45	44	22	20	20	24	38	22	14	17	14	12
IPI00005750	Q9NTG1	Q5THM3	ENSP00000253255	NP_006062	HIT000069927	OTTHUMP00000028714	0	0	0	0	0	0	0	0	0	0	0	0	0	0	0	1
IPI00010832	Q9BXQ6		ENSP00000329318	NP_114096	HIT000076902	OTTHUMP00000028726	1	0	2	2	0	0	0	0	0	1	1	0	0	0	1	0
IPI00006181	O15371	Q3MJD9	ENSP00000216190	NP_003744	HIT000281442	OTTHUMP00000028733	0	0	0	0	0	0	0	1	1	0	0	2	0	0	0	0
IPI00477642	Q10571	Q5T313	ENSP00000304956	NP_002421	HIT000323912	OTTHUMP00000028743	0	0	0	1	0	0	0	0	0	0	0	0	0	0	0	0
IPI00003479	P28482	Q1HBJ4	ENSP00000215832	NP_002736	HIT000300855	OTTHUMP00000028754	19	12	22	14	17	21	21	24	17	10	20	18	13	16	22	19
IPI00023191	O60784	Q86X74	ENSP00000338422	NP_005479	HIT000244128	OTTHUMP00000028777	6	4	4	6	9	7	5	5	3	6	6	3	14	7	3	5
IPI00293867	P30046	Q53Y51	ENSP00000215773	NP_001346	HIT000220119	OTTHUMP00000028784	12	6	7	3	17	11	3	5	6	10	8	4	10	12	15	6
IPI00472065			ENSP00000215780			OTTHUMP00000028785	1	1	0	2	0	0	0	0	0	0	0	0	0	0	0	0
IPI00029048	Q14166	Q20WK5	ENSP00000216129	NP_055955	HIT000291080	OTTHUMP00000028800	0	0	0	0	0	1	0	0	0	0	0	0	0	0	0	0
IPI00219703	P20472		ENSP00000216200	NP_002845	HIT000322570	OTTHUMP00000028802	0	0	0	0	0	0	0	0	2	1	0	0	0	0	0	0
IPI00024976	Q9NS69	Q53GB0	ENSP00000216034	NP_064628	HIT000008005	OTTHUMP00000028813	6	3	6	2	5	2	2	4	7	8	5	2	2	2	1	0
IPI00289849		Q5R3F8	ENSP00000300147	NP_443138	HIT000001619	OTTHUMP00000028829	0	0	2	0	1	1	0	0	0	0	0	1	0	0	0	0
IPI00383798	O43272	Q0P507	ENSP00000334726	NP_057419	HIT000221554	OTTHUMP00000028842	0	0	0	0	0	1	0	3	0	1	4	0	0	0	0	0
IPI00304435	Q9BPW8		ENSP00000216121	NP_003625	HIT000275615	OTTHUMP00000028856	17	13	12	5	17	15	10	10	16	16	14	17	10	5	7	6
IPI00294159	P53007	Q6LAP8	ENSP00000215882	NP_005975	HIT000193967	OTTHUMP00000028859	3	2	0	0	2	2	0	1	1	0	1	1	0	0	0	0
IPI00027826	Q9H1K4		ENSP00000329033	NP_113669	HIT000247926	OTTHUMP00000028867	0	0	0	0	0	0	0	0	0	0	1	0	0	0	0	0
IPI00032826	P50502	Q0IJ56	ENSP00000216218	NP_003923	HIT000053854	OTTHUMP00000028873	8	6	8	4	14	17	22	19	14	18	13	8	15	14	15	9
IPI00004839	P46109		ENSP00000346300	NP_005198	HIT000091232	OTTHUMP00000028878	8	3	6	2	7	7	6	9	7	8	9	11	6	2	3	2
IPI00031836	Q9Y295	Q9UFA5	ENSP00000329715	NP_004138	HIT000066260	OTTHUMP00000028883	0	0	0	0	0	0	0	0	1	1	0	1	0	0	0	0
IPI00019926	P35626	Q8N433	ENSP00000317578	NP_005151	HIT000322963	OTTHUMP00000028888	0	0	0	0	0	0	1	0	0	0	0	0	0	0	0	0
IPI00000021		Q16193				OTTHUMP00000028893		0	0	0	0	0	0	0	0	1	0	0	0	0	0	0	1
IPI00412713	Q9Y512	Q53HC4	ENSP00000345445	NP_056195	HIT000035370	OTTHUMP00000028894	5	0	1	0	4	2	1	3	8	6	16	7	1	1	2	2
IPI00216319	Q04917	Q9H4N8	ENSP00000248975	NP_003396	HIT000295865	OTTHUMP00000028905	34	27	32	17	35	33	39	40	42	38	44	39	22	18	25	21
IPI00070943	P42356	Q4LE69	ENSP00000255882	NP_477352	HIT000062248	OTTHUMP00000028907	6	3	3	4	7	5	6	2	9	14	9	3	1	2	2	0
IPI00032831	O95721		ENSP00000215730	NP_004773	HIT000267516	OTTHUMP00000028908	0	0	0	0	2	1	0	1	0	0	0	0	0	0	0	0
IPI00293276	P14174	Q6FHV0	ENSP00000215754	NP_002406	HIT000039526	OTTHUMP00000028932	19	16	15	17	17	14	13	7	17	11	24	12	21	22	24	23
IPI00220007	Q9BQE5	Q59GW9	ENSP00000249066	NP_112092	HIT000077455	OTTHUMP00000028936	0	0	0	0	0	1	0	0	2	1	0	0	0	0	0	0
IPI00018314	O76054	Q53EQ2	ENSP00000316203	NP_036561	HIT000000902	OTTHUMP00000028943	4	0	1	0	1	4	0	0	0	3	3	4	2	0	0	0
IPI00328128	P19086	Q8IY73	ENSP00000248996	NP_002064	HIT000265722	OTTHUMP00000028947	9	6	6	5	15	13	9	14	17	16	21	11	5	3	3	4
IPI00479260	Q8NDV3	Q6ZUF9	ENSP00000350036	NP_683515	HIT000248307	OTTHUMP00000028953	0	0	1	0	0	0	0	0	0	0	0	0	0	0	0	0
IPI00643447						OTTHUMP00000028957	0	0	0	0	0	0	0	0	0	0	1	0	0	0	0	0
IPI00168678	Q8NEJ0		ENSP00000333917	NP_689724	HIT000041190	OTTHUMP00000028962	0	0	0	0	0	0	0	0	1	0	0	0	0	0	0	0
IPI00742749		Q5JZ71	ENSP00000370568		HIT000001360	OTTHUMP00000028979	0	0	0	0	0	1	0	0	0	0	0	0	0	0	0	0
IPI00219219	P09382	Q0JVC4	ENSP00000215909	NP_002296	HIT000267445	OTTHUMP00000028982	14	10	4	7	12	15	1	4	11	12	14	20	22	33	12	12
IPI00298984	O14994	Q17R54	ENSP00000330219	NP_003481	HIT000064014	OTTHUMP00000028987	4	2	0	0	3	3	2	2	7	2	5	4	0	1	0	0
IPI00513721		Q5TAJ1	ENSP00000357225			OTTHUMP00000029024	0	0	0	0	0	0	0	0	0	0	0	1	0	0	0	0
IPI00177884	Q96PV0		ENSP00000293748	NP_006763		OTTHUMP00000029119		20	7	11	6	21	28	18	19	14	14	23	14	0	1	1	197
IPI00006052	Q9UHV9	Q5SY55	ENSP00000271485	NP_036526	HIT000035827	OTTHUMP00000029707	0	0	0	0	0	1	1	0	2	1	0	0	0	1	1	1
IPI00552198		Q5JW81	ENSP00000357056			OTTHUMP00000029888	0	0	0	0	0	0	0	0	0	1	0	0	0	0	0	0
IPI00375339	Q13733	Q7Z4I9	ENSP00000255017	NP_653300	HIT000243614	OTTHUMP00000029890	0	0	0	0	0	0	0	0	1	0	0	0	0	0	0	0
IPI00290307	Q96RU7		ENSP00000217233	NP_066981	HIT000251185	OTTHUMP00000029910	0	1	0	0	0	0	0	0	0	0	0	0	0	0	0	0
IPI00376319	Q9NQ03		ENSP00000246104	NP_149120	HIT000250752	OTTHUMP00000029934	0	0	0	0	0	1	0	0	0	0	0	0	0	0	0	0
IPI00031775	Q9Y264	Q5TFF4	ENSP00000262924	NP_057069	HIT000065986	OTTHUMP00000029947	0	0	0	0	0	0	1	0	0	0	0	0	0	0	0	0
IPI00375705		Q5SXI1	ENSP00000279477			OTTHUMP00000029994	8	3	2	3	7	11	7	4	0	0	0	0	0	0	0	0
IPI00332887	P78324		ENSP00000348307	NP_001035111		OTTHUMP00000030001		7	6	3	9	8	7	5	2	21	24	22	22	9	5	7	164
IPI00552390		Q5JXS9	ENSP00000370188			OTTHUMP00000030025	0	0	1	0	0	0	0	0	0	0	0	0	0	0	0	0
IPI00006606	Q9BYN8		ENSP00000246103	NP_110438	HIT000036085	OTTHUMP00000030073	1	0	0	0	0	0	0	0	0	0	1	0	0	0	0	0
IPI00020719	Q7Z434	Q2HWT5	ENSP00000350852	NP_065797	HIT000242140	OTTHUMP00000030141	0	0	0	0	0	0	0	0	0	0	0	0	0	1	0	1
IPI00032150	O95674		ENSP00000217268	NP_003809	HIT000040004	OTTHUMP00000030195	9	2	4	4	9	7	6	4	6	10	12	6	5	4	4	4
IPI00006601	P05060	Q59EU9	ENSP00000203005	NP_001810	HIT000325267	OTTHUMP00000030215	0	0	0	0	4	3	5	6	6	0	2	1	1	0	0	0
IPI00100247	Q9H1E5		ENSP00000246024	NP_066979	HIT000097932	OTTHUMP00000030232	3	1	3	1	3	4	6	4	4	2	3	3	0	0	2	2
IPI00219563	Q9NQ66		ENSP00000333156	NP_056007	HIT000000298	OTTHUMP00000030237	75	43	53	25	71	77	45	37	57	60	58	68	17	23	16	12
IPI00010470	P60880	Q53EM2	ENSP00000254976	NP_570824	HIT000101100	OTTHUMP00000030267	6	8	9	3	12	12	16	19	16	18	13	13	14	20	14	14
IPI00107625	P60880	Q5U0B5	ENSP00000307341	NP_003072		OTTHUMP00000030268		6	7	6	1	12	10	8	11	7	8	11	6	2	2	2	101
IPI00152692	Q8TEA8	Q496C9	ENSP00000262550	NP_543010	HIT000052922	OTTHUMP00000030364	4	2	3	0	0	1	2	3	5	4	2	0	0	0	1	1
IPI00748037	Q9H115		ENSP00000246011	NP_071363	HIT000260142	OTTHUMP00000030424	2	2	4	1	5	4	6	9	16	6	10	3	0	0	0	1
IPI00032293	P01034	Q6FGW9	ENSP00000217421	NP_000090	HIT000280800	OTTHUMP00000030440	6	2	6	1	8	6	6	7	7	5	5	5	6	6	11	8
IPI00004358	P11216	Q59GM9	ENSP00000216962	NP_002853	HIT000037804	OTTHUMP00000030488	66	51	51	35	59	53	61	60	36	44	52	56	34	43	56	47
IPI00021985	Q92544		ENSP00000217315	NP_055557	HIT000042388	OTTHUMP00000030581	0	0	0	0	0	1	0	0	0	0	0	0	0	0	0	0
IPI00004533	O15066		ENSP00000262652	NP_004789	HIT000000065	OTTHUMP00000030588	0	2	0	0	3	3	1	2	1	0	0	1	1	0	0	0
IPI00017596	Q15691	Q3KQS8	ENSP00000217347	NP_036457	HIT000096152	OTTHUMP00000030608	3	1	4	0	4	3	3	4	2	6	4	3	9	7	2	6
IPI00164528	Q13424	Q29RY0	ENSP00000217381	NP_003089	HIT000040145	OTTHUMP00000030650	0	0	0	0	0	2	0	0	4	4	3	3	0	1	0	0
IPI00025974	Q9H444		ENSP00000217402	NP_789782	HIT000294873	OTTHUMP00000030668	4	4	6	5	5	9	5	7	11	4	12	7	13	14	11	4
IPI00012007	P23526	Q1RMG2	ENSP00000217426	NP_000678	HIT000035325	OTTHUMP00000030684	8	1	7	3	10	8	6	7	8	7	10	7	5	3	8	4
IPI00030634	Q9UJ14		ENSP00000338964	NP_821158		OTTHUMP00000030708		0	0	1	0	0	1	0	1	0	0	0	0	0	0	0	3
IPI00339364	Q9UJ14		ENSP00000253380			OTTHUMP00000030709	0	0	0	0	0	0	0	1	0	2	2	2	0	0	0	0
IPI00010706	P48637	Q8TDA8	ENSP00000216951	NP_000169	HIT000033538	OTTHUMP00000030711	2	0	1	0	1	0	0	0	5	1	0	0	0	2	0	2
IPI00010105	P56537	Q6IBN8	ENSP00000246231	NP_002203	HIT000001733	OTTHUMP00000030734	2	1	2	0	0	2	1	2	2	2	0	1	2	2	2	0
IPI00015522	P43026	Q2NKW7	ENSP00000246185	NP_000548	HIT000051058	OTTHUMP00000030755	0	0	0	0	0	0	0	0	0	0	0	1	0	0	0	0
IPI00024062	Q9H4G0		ENSP00000337168	NP_036288	HIT000000044	OTTHUMP00000030825	16	18	15	11	30	25	24	30	35	29	36	33	9	10	10	11
IPI00220278	P24844	Q6IBG1	ENSP00000279022	NP_006088	HIT000101759	OTTHUMP00000030857	1	0	0	0	0	0	0	0	0	0	0	0	0	0	0	0
IPI00294739	Q9Y3Z3	Q59H15	ENSP00000262878	NP_056289	HIT000011083	OTTHUMP00000030889	0	0	0	0	0	0	0	0	0	1	0	0	0	0	0	0
IPI00009659	Q9NQG5	Q1WDE7	ENSP00000217394	NP_067038	HIT000041874	OTTHUMP00000030953	1	0	0	0	0	0	0	0	0	0	0	0	0	0	0	0
IPI00294578	P21980	Q6B838	ENSP00000351290	NP_004604	HIT000257086	OTTHUMP00000030960	0	0	0	0	0	0	0	0	0	0	1	0	0	0	0	0
IPI00292993	P17213	Q1ZZU8	ENSP00000262865	NP_001716	HIT000191280	OTTHUMP00000030963	0	1	0	0	0	0	0	0	0	0	0	0	0	0	0	0
IPI00292787	Q9H9F9		ENSP00000243903	NP_079131	HIT000052025	OTTHUMP00000030976	0	1	0	0	0	0	0	0	0	0	0	0	0	0	0	0
IPI00026015	Q9H598		ENSP00000217420	NP_542119	HIT000011665	OTTHUMP00000030977	3	0	1	0	1	2	2	2	0	0	2	1	0	0	0	0
IPI00006535	Q9Y366		ENSP00000262601	NP_057088	HIT000052261	OTTHUMP00000031034	0	0	0	0	0	1	0	0	0	0	0	0	0	0	0	0
IPI00306658	Q96MZ0		ENSP00000341782	NP_076939	HIT000299791	OTTHUMP00000031054	6	0	8	3	8	6	6	7	5	9	5	4	2	0	1	0
IPI00301180	Q9H2X9		ENSP00000243964	NP_065759	HIT000073919	OTTHUMP00000031197	28	17	18	11	31	24	10	9	22	22	15	10	5	8	7	2
IPI00002186	Q9Y6D5	Q59FR3	ENSP00000262983	NP_006411	HIT000066632	OTTHUMP00000031231	0	0	0	0	0	0	1	1	0	0	1	0	1	0	0	0
IPI00022215	Q9H2P0	Q5BKU2	ENSP00000262599	NP_056154	HIT000075027	OTTHUMP00000031275	0	0	0	0	0	0	0	0	0	0	0	0	0	0	1	0
IPI00025310	O75362	Q14DB8	ENSP00000303399	NP_006517	HIT000063651	OTTHUMP00000031307	0	0	0	0	0	0	0	1	0	0	0	0	0	0	0	0
IPI00025311	O75363		ENSP00000262592	NP_003648	HIT000063652	OTTHUMP00000031313	0	0	0	0	0	0	0	1	0	0	3	0	4	3	1	1
IPI00011528	Q05048	Q5QPD8	ENSP00000217109	NP_001028693	HIT000304483	OTTHUMP00000031332	0	1	0	0	0	0	0	0	0	0	0	0	0	0	0	0
IPI00006211	O95292	Q53XM7	ENSP00000265619	NP_004729	HIT000006515	OTTHUMP00000031393	5	4	3	2	9	7	3	4	4	0	4	3	3	1	2	0
IPI00024175	O14818		ENSP00000217153	NP_002783	HIT000279929	OTTHUMP00000031449	3	0	2	1	3	6	1	0	5	1	5	4	1	1	0	0
IPI00017448	P63220	Q6FGH5	ENSP00000324438	NP_001015	HIT000090495	OTTHUMP00000031485	3	0	2	0	0	0	0	0	0	2	1	2	0	0	0	0
IPI00031603	Q9BVV2		ENSP00000245671	NP_076964	HIT000030000	OTTHUMP00000031566	0	0	0	1	0	0	0	0	0	0	0	0	0	0	0	0
IPI00646641	O95407		ENSP00000359013	NP_003814	HIT000000805	OTTHUMP00000031579	0	0	0	0	0	0	0	0	0	1	0	0	0	0	0	0
IPI00176532	Q9BR39	Q86VZ3	ENSP00000278973	NP_065166		OTTHUMP00000031651		0	0	0	1	0	0	0	0	0	0	0	0	0	0	0	1
IPI00033019	Q14721	Q2NLD5	ENSP00000289405	NP_004966	HIT000191497	OTTHUMP00000031697	0	0	1	0	0	0	0	0	1	1	0	0	0	0	0	0
IPI00556641	Q9BQK8		ENSP00000255145	NP_075047	HIT000055729	OTTHUMP00000031711	0	0	0	0	0	0	0	0	0	0	1	0	0	0	0	0
IPI00014424	Q05639	Q0VGC7	ENSP00000217182	NP_001949	HIT000279336	OTTHUMP00000031776	19	13	15	11	18	17	22	16	20	20	25	19	10	9	4	8
IPI00011564	P31431	Q53FN9	ENSP00000255127	NP_002990	HIT000100490	OTTHUMP00000031788	0	0	0	0	1	0	0	0	0	0	0	0	0	0	0	0
IPI00441867	P40855	Q5QNY4	ENSP00000294784	NP_002848	HIT000323530	OTTHUMP00000031848	2	1	1	0	3	5	1	2	6	3	6	3	0	0	0	1
IPI00152647	Q8TDW5		ENSP00000297875	NP_620135	HIT000061369	OTTHUMP00000031916	0	0	0	0	0	0	1	0	0	0	0	0	0	0	0	0
IPI00032003	P50402	Q6FI02	ENSP00000218240	NP_000108	HIT000029882	OTTHUMP00000031938	2	0	1	0	0	1	0	1	1	2	1	0	0	0	1	1
IPI00029184	Q9GZV7	Q5T3J0	ENSP00000255039	NP_068589	HIT000059501	OTTHUMP00000031987	3	0	0	0	0	0	1	2	6	9	12	8	25	21	29	29
IPI00168479		Q496C6	ENSP00000295574	NP_658985	HIT000247180	OTTHUMP00000031989	7	3	7	4	7	10	6	7	7	8	12	8	4	4	8	6
IPI00020884	P51805	Q5HY36	ENSP00000253128	NP_059984	HIT000324316	OTTHUMP00000032114	0	1	0	0	0	0	1	0	0	0	0	0	0	0	0	0
IPI00010154	P31150	Q6FG50	ENSP00000358749	NP_001484		OTTHUMP00000032118		95	78	66	54	113	102	103	103	104	95	112	110	69	75	96	1464
IPI00456623	Q96GW7	Q59F90	ENSP00000331210	NP_068767	HIT000252416	OTTHUMP00000032164	28	25	27	24	40	40	37	45	23	27	34	29	28	33	45	42
IPI00031357	P50336	Q5VTW8	ENSP00000343943	NP_000300	HIT000030824	OTTHUMP00000032237	0	0	0	0	2	1	0	0	0	0	0	0	0	0	0	0
IPI00025239	O75306	Q53HG2	ENSP00000289897	NP_004541	HIT000034035	OTTHUMP00000032241	16	7	10	0	14	6	7	8	17	23	21	15	8	6	6	6
IPI00021854	P02652		ENSP00000289906	NP_001634	HIT000032344	OTTHUMP00000032244	0	0	0	0	0	0	1	0	0	1	6	2	0	0	0	0
IPI00026994	O60831		ENSP00000218169	NP_009144	HIT000244059	OTTHUMP00000032407	3	2	2	4	2	2	4	0	2	4	4	2	4	3	5	3
IPI00642108						OTTHUMP00000032412	0	0	0	1	0	0	0	0	0	0	0	0	0	0	0	0
IPI00639859						OTTHUMP00000032425	0	0	0	0	0	0	0	0	0	0	0	0	1	0	0	0
IPI00002280		Q4VC04	ENSP00000218230	NP_037403	HIT000284842	OTTHUMP00000032426	38	22	26	17	33	31	29	34	24	39	35	34	23	18	15	13
IPI00027770	P08247		ENSP00000263233	NP_003170	HIT000279072	OTTHUMP00000032504	100	63	86	58	164	149	45	56	109	182	192	172	18	20	11	18
IPI00180637		O75663	ENSP00000356806	NP_690866	HIT000242171	OTTHUMP00000032581	3	1	1	1	4	4	2	3	2	1	1	1	0	0	1	0
IPI00479877	P49189	Q6NSM2	ENSP00000271359	NP_000687	HIT000304494	OTTHUMP00000032604	2	3	3	1	10	11	17	18	11	7	17	8	10	16	7	9
IPI00220301	P30041		ENSP00000236251	NP_004896	HIT000283339	OTTHUMP00000032693	53	41	46	25	49	45	36	53	28	48	43	49	51	55	65	53
IPI00160552	Q92752		ENSP00000263525	NP_003276	HIT000325034	OTTHUMP00000032802	62	32	47	28	97	88	61	69	71	78	97	85	48	55	63	47
IPI00031680	Q9BR61		ENSP00000258326	NP_115736	HIT000255733	OTTHUMP00000033086	0	0	0	0	0	0	1	0	0	0	0	0	0	0	0	0
IPI00011421	Q13015	Q6FGF7	ENSP00000271717	NP_006809	HIT000090621	OTTHUMP00000033120	0	0	0	0	0	0	0	0	0	0	0	1	0	0	0	0
IPI00013930	O43752	Q49AF6	ENSP00000258301	NP_005810	HIT000034687	OTTHUMP00000033134	0	0	0	0	0	0	0	0	0	1	1	0	0	0	0	0
IPI00288988		Q5VZ46	ENSP00000258314	XP_046531		OTTHUMP00000033135		0	0	1	0	0	0	0	0	0	0	0	0	0	0	0	1
IPI00015864	Q05823	Q1RLL8	ENSP00000258306	NP_066956	HIT000306143	OTTHUMP00000033148	0	0	0	0	0	0	0	0	0	0	0	0	1	0	0	1
IPI00175977	Q8NAT2	Q5EBN4	ENSP00000294848	NP_775804	HIT000046762	OTTHUMP00000033192	1	0	0	0	1	0	0	0	0	0	0	0	0	0	0	0
IPI00168878	Q8NFQ8		ENSP00000303458	NP_659471	HIT000080291	OTTHUMP00000033196	0	0	0	0	1	0	0	0	0	0	0	0	0	0	0	0
IPI00006599	Q9H246		ENSP00000235307	NP_110433	HIT000077073	OTTHUMP00000033397	0	0	0	0	2	2	0	0	0	0	0	0	0	0	0	0
IPI00298281	P11047	Q5VYE7	ENSP00000258341	NP_002284	HIT000191137	OTTHUMP00000033450	3	0	1	0	5	0	0	1	3	0	3	0	0	0	0	3
IPI00479090		Q5VU14	ENSP00000357081			OTTHUMP00000033459	0	0	0	0	0	1	0	0	0	0	0	0	0	0	0	0
IPI00640856	Q9H869	Q0JTE1	ENSP00000295566	NP_620829	HIT000007250	OTTHUMP00000033479	0	0	0	0	0	1	0	0	0	0	0	0	0	0	0	0
IPI00018120	P51398	Q68CT7	ENSP00000341692	NP_004623	HIT000296646	OTTHUMP00000033480	0	0	0	0	0	0	0	0	0	0	2	2	0	1	0	0
IPI00026108	P47712	Q29R80	ENSP00000264143	NP_077734	HIT000196196	OTTHUMP00000033543	0	0	0	0	0	0	0	0	0	0	0	0	0	1	0	0
IPI00418887	Q76B58	Q2M330	ENSP00000294697	NP_950252	HIT000242332	OTTHUMP00000033554	0	0	0	0	1	1	0	0	0	0	1	0	0	0	0	0
IPI00013678	Q13505	Q4VX25	ENSP00000357359	NP_002446	HIT000285177	OTTHUMP00000033824	4	1	1	0	3	1	3	0	2	3	1	3	2	2	1	1
IPI00329535	P49746	Q2HIZ0	ENSP00000303852	NP_009043	HIT000193422	OTTHUMP00000033827	0	0	0	0	0	0	0	0	0	0	0	0	1	0	0	0
IPI00299554	Q15058	Q14CI8	ENSP00000236917	NP_055690	HIT000042191	OTTHUMP00000033836	0	0	0	0	1	0	0	0	0	0	0	0	0	0	0	0
IPI00442073	P21291	Q5U0J2	ENSP00000345079	NP_004069	HIT000293375	OTTHUMP00000033921	12	7	9	5	10	15	27	24	22	21	20	18	13	18	33	23
IPI00185146	Q96P70	Q5SVH6	ENSP00000354742	NP_060555	HIT000079212	OTTHUMP00000033949	0	0	0	0	0	0	0	0	1	0	1	0	0	0	0	0
IPI00514190		Q5VUU1	ENSP00000355064	NP_937792	HIT000087325	OTTHUMP00000033952	0	0	0	0	0	0	0	0	0	0	0	0	1	2	1	0
IPI00292732		Q12833	ENSP00000347041	NP_002014	HIT000323531	OTTHUMP00000034098	3	0	0	0	0	0	0	0	2	0	0	0	0	0	0	0
IPI00020987	P51888	Q6FG38	ENSP00000343924	NP_002716	HIT000218950	OTTHUMP00000034099	6	1	0	0	2	3	0	0	7	3	1	3	0	0	0	0
IPI00032405	O60883	Q5SXP7	ENSP00000304242	NP_004758	HIT000325930	OTTHUMP00000034103	1	0	0	0	0	2	0	0	1	2	0	1	0	0	2	2
IPI00514856	Q14157		ENSP00000355343	NP_055662		OTTHUMP00000034204		3	2	2	0	0	1	3	1	3	0	2	0	0	0	1	18
IPI00022145	Q9H1E3	Q54AC0	ENSP00000289722	NP_073568	HIT000029932	OTTHUMP00000034230	0	0	2	0	0	1	0	1	1	1	10	4	1	1	4	2
IPI00029045	Q14164	Q3B754	ENSP00000271742	NP_054721	HIT000042288	OTTHUMP00000034540	0	0	0	0	0	0	0	0	0	1	0	0	0	0	0	0
IPI00299404	Q13751		ENSP00000347288	NP_000219	HIT000101403	OTTHUMP00000034555	0	0	0	0	0	0	0	0	0	0	0	1	0	0	0	0
IPI00719621	O75051	Q5JRL6	ENSP00000264296	NP_079455	HIT000000180	OTTHUMP00000034732	0	0	0	0	2	2	1	0	0	0	2	0	0	0	0	0
IPI00016179	Q99584	Q52PI9	ENSP00000344822	NP_001019381	HIT000021987	OTTHUMP00000034802	0	0	2	0	7	5	4	5	4	1	4	1	4	7	2	6
IPI00002525	Q9UMX5		ENSP00000261463	NP_037481	HIT000033998	OTTHUMP00000034886	0	0	1	0	2	3	2	3	0	0	1	0	0	0	0	1
IPI00014978	Q15172	Q2NL72	ENSP00000261461	NP_006234	HIT000193807	OTTHUMP00000034891	2	0	0	0	1	3	0	0	0	2	0	1	0	0	1	0
IPI00018331	O95295	Q5SXU8	ENSP00000271856	NP_036569	HIT000007829	OTTHUMP00000035157	0	0	0	0	1	0	0	0	2	0	0	0	0	0	0	0
IPI00005198	Q12905	Q53FG3	ENSP00000271939	NP_004506	HIT000272623	OTTHUMP00000035158	1	0	0	1	0	1	2	0	0	3	2	5	1	0	2	1
IPI00024966	Q02246	Q5T054	ENSP00000330633	NP_005067	HIT000322876	OTTHUMP00000035179	1	1	1	0	1	0	4	6	1	3	3	4	1	0	5	1
IPI00022447	Q92604	Q5T1V4	ENSP00000333346	NP_055688	HIT000042342	OTTHUMP00000035214	0	0	0	0	0	0	0	0	0	0	0	1	0	1	0	0
IPI00329582		Q6UY25	ENSP00000310588	NP_857595	HIT000051741	OTTHUMP00000035320	3	3	0	0	0	1	0	0	1	2	0	0	0	0	0	0
IPI00333410	Q7Z7E8	Q29SN7	ENSP00000292211	NP_060052	HIT000250707	OTTHUMP00000035378	0	0	0	0	0	0	0	0	0	0	1	0	0	0	0	0
IPI00017283	Q9NSE4	Q1M2P9	ENSP00000303279	NP_060530	HIT000101302	OTTHUMP00000035401	1	1	1	0	3	1	2	1	4	2	5	7	1	0	0	0
IPI00058344	Q5T619		ENSP00000344129	NP_001009992	HIT000048527	OTTHUMP00000035419	0	0	1	0	0	0	0	0	0	0	0	0	0	0	0	0
IPI00305258		Q5VT66	ENSP00000236452	NP_073583		OTTHUMP00000035461		0	0	0	0	0	0	0	0	0	0	0	1	0	0	0	1
IPI00329552		Q0JSK7	ENSP00000263907	NP_060368	HIT000035576	OTTHUMP00000035465	3	0	0	0	0	0	1	0	0	0	0	0	0	0	0	0
IPI00289758	P17655	Q59EF6	ENSP00000295006	NP_001739	HIT000194882	OTTHUMP00000035497	3	4	3	3	2	6	5	2	5	4	2	6	1	2	1	2
IPI00010130	P15104	Q2TU80	ENSP00000307900	NP_001028216	HIT000038498	OTTHUMP00000035524	86	68	41	27	55	53	33	42	48	51	42	33	10	14	13	13
IPI00220648	Q15126	Q5TZW9	ENSP00000295520	NP_006547	HIT000032596	OTTHUMP00000035546	0	0	0	0	0	0	0	0	1	0	1	1	0	0	0	0
IPI00013452	P07814	Q3KQZ8	ENSP00000259146	NP_004437	HIT000321887	OTTHUMP00000035562	7	0	1	0	7	6	4	3	3	0	2	3	0	0	0	0
IPI00410214	O95861		ENSP00000318852		HIT000070489	OTTHUMP00000035564	3	0	2	0	3	3	0	1	3	2	0	0	0	0	0	1
IPI00449049	P09874	Q5VX86	ENSP00000272146	NP_001609	HIT000195479	OTTHUMP00000035663	0	0	0	0	0	0	0	0	2	4	4	0	0	1	2	1
IPI00009315	Q9H3P7		ENSP00000327483	NP_073572	HIT000059351	OTTHUMP00000035668	0	0	0	0	0	0	0	0	0	0	0	0	0	0	0	1
IPI00303602		Q49A81	ENSP00000333985	NP_073742	HIT000262773	OTTHUMP00000035773	0	0	0	0	0	0	0	0	0	0	1	0	0	0	0	0
IPI00642816	P49458	Q8WVW9	ENSP00000305230	NP_003124	HIT000033795	OTTHUMP00000035860	1	1	0	1	0	1	0	0	1	0	3	0	0	0	0	0
IPI00009896	P07099	Q6FGZ3	ENSP00000272167	NP_000111	HIT000031605	OTTHUMP00000035867	2	1	2	0	10	5	5	3	0	1	2	1	0	0	5	6
IPI00032220	P01019	Q53GY3	ENSP00000258224	NP_000020	HIT000191381	OTTHUMP00000035878	0	0	2	1	1	0	0	0	2	0	0	0	1	0	0	0
IPI00296532		Q5SR37	ENSP00000322530	NP_078830	HIT000028155	OTTHUMP00000035879	3	0	0	0	0	0	0	0	4	2	1	2	0	0	0	0
IPI00013912		Q9H425	ENSP00000238200	NP_116189	HIT000021021	OTTHUMP00000035916	0	0	0	0	2	0	2	0	0	0	0	0	2	3	1	1
IPI00031570	Q9BSD7	Q5TDE9	ENSP00000258258	NP_115700	HIT000299770	OTTHUMP00000035941	1	0	0	2	0	1	1	1	0	0	0	0	0	0	0	0
IPI00010476	O00180	Q5T5E8	ENSP00000258230	NP_002236	HIT000219324	OTTHUMP00000036029	0	0	0	0	0	0	1	0	0	0	0	0	0	0	0	0
IPI00028264	Q8IYI6		ENSP00000353564	NP_787072	HIT000051504	OTTHUMP00000036150	0	0	0	0	2	0	0	0	0	0	0	0	0	0	0	0
IPI00514771		Q5TDI7	ENSP00000355634			OTTHUMP00000037472	0	0	0	0	0	0	0	0	0	0	1	0	0	0	0	0
IPI00293350	Q99598	Q5VT41	ENSP00000261391	NP_005990	HIT000324888	OTTHUMP00000037482	0	0	0	0	0	1	0	1	2	1	2	0	0	0	0	1
IPI00437585		Q5JVI7	ENSP00000359789			OTTHUMP00000037509	0	0	1	0	0	0	0	0	0	0	0	0	0	0	0	0
IPI00145260		Q5T440	ENSP00000355672	NP_001010867	HIT000006070	OTTHUMP00000037760	0	0	0	0	0	1	0	0	0	0	0	1	0	0	0	0
IPI00007029	Q5T442		ENSP00000354827	NP_065168	HIT000266282	OTTHUMP00000037763	0	0	0	0	0	0	0	0	0	0	0	0	1	2	1	0
IPI00742944	Q9NZ56		ENSP00000318884	NP_064450		OTTHUMP00000037814		1	0	1	0	3	4	1	0	3	1	2	3	0	0	0	19
IPI00018402	Q15813		ENSP00000264180	NP_003184	HIT000278455	OTTHUMP00000037906	0	0	0	0	0	0	0	0	0	0	0	2	2	0	0	0
IPI00019884	P35609	Q59FD9	ENSP00000264176	NP_001094	HIT000196625	OTTHUMP00000037963	21	10	7	3	19	25	26	23	28	17	24	10	2	5	1	0
IPI00026833	P30520	Q5SVJ2	ENSP00000263828	NP_001117	HIT000035776	OTTHUMP00000037982	2	0	0	1	2	2	0	0	4	3	2	2	0	0	3	2
IPI00464988		Q6B0H9	ENSP00000306976	NP_056246	HIT000021043	OTTHUMP00000038054	0	0	0	0	0	0	1	0	0	0	0	0	0	0	0	0
IPI00329600	Q8NBX0		ENSP00000271981	NP_057086	HIT000071620	OTTHUMP00000038085	2	0	1	0	3	2	2	1	9	4	7	5	3	2	5	7
IPI00644079	Q00839	Q5RI17		NP_114032	HIT000065624	OTTHUMP00000038193	3	0	2	2	4	2	3	3	6	2	2	2	5	3	5	6
IPI00030058	P50150	Q5VSS8	ENSP00000303478	NP_004476	HIT000271777	OTTHUMP00000038436	0	0	0	0	1	0	0	0	0	0	0	0	0	0	0	0
IPI00003848	Q9UDY4	Q59E89	ENSP00000294629	NP_008965	HIT000051216	OTTHUMP00000038541	3	0	3	0	2	5	2	0	2	4	4	2	1	1	0	0
IPI00328296	Q8TF65		ENSP00000260524	NP_060125	HIT000051612	OTTHUMP00000038608	0	0	0	0	0	0	1	0	0	0	0	0	0	0	0	0
IPI00644778	O75037	Q5T4J4	ENSP00000328494	NP_060066		OTTHUMP00000038646		0	0	0	0	0	0	0	0	0	0	0	0	0	0	1	1
IPI00470674		O95329	ENSP00000290512	NP_057327	HIT000253070	OTTHUMP00000038802	3	1	1	0	0	7	2	1	2	3	4	1	1	1	0	1
IPI00219274	Q8N9I0	Q496K5	ENSP00000315589	NP_796376	HIT000019285	OTTHUMP00000038803	3	1	0	0	0	0	0	0	0	1	3	2	2	2	1	0
IPI00002147	P36222		ENSP00000255409	NP_001267	HIT000196457	OTTHUMP00000039087	0	0	0	0	0	0	0	0	0	0	2	0	0	0	0	0
IPI00397578		Q5VV84	ENSP00000356207			OTTHUMP00000039088	0	0	0	0	0	1	0	1	0	0	0	0	0	0	0	0
IPI00026872	P30542	Q6FHK3	ENSP00000308549	NP_000665	HIT000192503	OTTHUMP00000039090	0	0	0	0	0	1	0	0	0	2	0	0	0	0	0	0
IPI00292646	Q99259	Q53TQ7	ENSP00000350928	NP_000808	HIT000040213	OTTHUMP00000041054	0	1	1	0	0	0	0	0	0	0	1	1	0	0	0	0
IPI00026846	P30531	Q8N4K8	ENSP00000287766	NP_003033	HIT000321914	OTTHUMP00000041132	2	1	4	0	5	0	0	0	3	2	1	1	0	0	0	0
IPI00215887	Q14957	O15398	ENSP00000293190	NP_000826	HIT000193973	OTTHUMP00000041930	0	0	0	0	0	0	0	0	0	0	0	0	1	0	0	0
IPI00025340	Q96GD0		ENSP00000215904	NP_064711		OTTHUMP00000042130		9	1	4	5	2	3	4	4	12	7	9	8	5	5	8	92
IPI00017855	Q99798	Q5JZ41	ENSP00000216254	NP_001089	HIT000036514	OTTHUMP00000042146	131	97	83	64	101	109	103	106	74	101	124	126	51	58	61	51
IPI00166130		Q6ICB0	ENSP00000263256	NP_056519	HIT000284351	OTTHUMP00000042148	0	0	0	0	0	1	0	0	0	0	0	0	0	0	1	0
IPI00647831		Q5HYV9				OTTHUMP00000042203		0	0	0	0	0	0	0	0	0	0	1	0	0	0	0	1
IPI00011229	P07339		ENSP00000236671	NP_001900	HIT000049449	OTTHUMP00000042282	17	10	15	11	27	21	11	25	23	23	31	28	19	11	26	22
IPI00398837		Q8NF44	ENSP00000315724	NP_115627		OTTHUMP00000042630		1	0	0	0	0	0	0	0	0	1	0	2	0	0	0	4
IPI00013743		Q9BRD0	ENSP00000260210	NP_116114	HIT000032775	OTTHUMP00000042639	0	0	0	0	0	0	0	0	0	0	0	1	0	0	0	0
IPI00020542	Q9NSA0		ENSP00000301891	NP_060954	HIT000042114	OTTHUMP00000042651	0	0	0	0	0	0	0	1	0	0	0	0	0	0	0	0
IPI00398828	Q9NR46		ENSP00000352659		HIT000001563	OTTHUMP00000043254	7	2	9	2	7	12	10	7	9	9	10	6	3	0	4	2
IPI00021841	P02647	Q6LEJ8	ENSP00000236850	NP_000030	HIT000320913	OTTHUMP00000043268	12	8	4	1	12	9	17	18	13	17	24	25	5	7	5	4
IPI00043810	Q99946		ENSP00000211413	NP_085154		OTTHUMP00000043327		0	0	0	0	0	0	0	0	0	1	0	0	0	0	0	1
IPI00306457		Q4ZHG4	ENSP00000297267	NP_115921	HIT000001581	OTTHUMP00000043348	0	0	0	0	0	0	0	0	1	0	0	0	0	0	1	0
IPI00024368	O75110	Q2NLD0	ENSP00000342481	NP_006036	HIT000249965	OTTHUMP00000043369	0	0	1	0	0	0	1	4	1	0	4	0	0	1	1	0
IPI00016634	Q9NWU2		ENSP00000266069	NP_060366	HIT000041428	OTTHUMP00000043372	0	0	0	0	0	0	0	1	0	0	0	0	0	0	0	0
IPI00006071	P28907	Q4FCX6	ENSP00000226279	NP_001766	HIT000285913	OTTHUMP00000045881	4	0	3	0	3	4	3	1	0	0	0	1	2	0	0	0
IPI00419237	P28838	Q6IAM6	ENSP00000226299	NP_056991	HIT000064978	OTTHUMP00000045895	6	4	3	1	6	5	4	10	8	3	6	8	5	5	7	3
IPI00419596		Q6UVY6	ENSP00000309351	NP_001026869	HIT000303715	OTTHUMP00000061520	0	0	0	0	0	0	0	0	0	0	1	0	0	0	0	0
IPI00154668	Q567U6	Q0JSD9	ENSP00000324135	NP_061917	HIT000040591	OTTHUMP00000064463	0	0	0	1	1	0	0	0	0	0	0	0	0	0	0	0
IPI00646038						OTTHUMP00000064810	0	0	0	0	0	0	0	0	0	0	1	0	0	0	0	0
IPI00658151	Q15772		ENSP00000265327	XP_001128413		OTTHUMP00000064868		0	0	0	0	0	0	0	1	0	0	0	0	0	1	0	2
IPI00306159	Q9BV79		ENSP00000263702	NP_057095	HIT000305332	OTTHUMP00000065098	0	0	0	0	1	0	0	0	4	2	2	1	1	0	0	0
IPI00152033	Q7Z2W7	Q3YFM7	ENSP00000323926	NP_076985	HIT000251823	OTTHUMP00000065206	0	0	0	0	0	0	0	0	0	0	0	1	0	0	0	0
IPI00003856	P36543	Q53Y06	ENSP00000253413	NP_001687	HIT000283919	OTTHUMP00000065606	22	16	18	15	19	22	28	23	24	22	25	25	7	17	8	6
IPI00549434	Q92599		ENSP00000327644		HIT000079696	OTTHUMP00000066074	2	2	2	0	1	1	2	1	2	2	2	2	0	0	0	0
IPI00044823	Q96QE2	Q17S07	ENSP00000280871	NP_443117	HIT000247174	OTTHUMP00000066086	0	0	0	0	0	1	0	0	0	0	0	1	0	0	0	0
IPI00020356	P78559	Q504X9	ENSP00000300231	NP_002364	HIT000273429	OTTHUMP00000066114	114	51	81	32	99	102	102	83	94	96	118	116	88	94	71	55
IPI00024742	O14949		ENSP00000296876	NP_055217	HIT000266308	OTTHUMP00000066205	1	1	0	0	2	2	2	0	0	0	0	0	1	0	0	0
IPI00410714	P69905	P78461	ENSP00000251595	NP_000508	HIT000273650	OTTHUMP00000066291	596	596	466	286	420	392	200	172	244	305	160	253	384	349	162	118
IPI00022790	P55081	Q86TG6	ENSP00000267812	NP_005917	HIT000217538	OTTHUMP00000066512	0	0	0	0	0	0	0	0	0	0	0	0	0	1	0	0
IPI00550775		Q4TT61	ENSP00000372482		HIT000030365	OTTHUMP00000067143	0	0	0	1	0	0	0	0	0	0	0	0	0	0	0	0
IPI00102685	Q96S97		ENSP00000337222	NP_001018654	HIT000083531	OTTHUMP00000067222	0	0	0	0	2	2	2	1	1	1	3	1	1	5	4	2
IPI00007128	P05129	Q59EZ0	ENSP00000263431	NP_002730	HIT000053264	OTTHUMP00000067291	9	6	4	0	13	22	17	17	13	15	17	9	2	1	4	2
IPI00103604	Q8WXS5		ENSP00000270458	NP_114101	HIT000078382	OTTHUMP00000067377	2	0	2	0	0	0	2	0	0	0	0	0	0	0	0	0
IPI00333134	O43426		ENSP00000349903	NP_982271	HIT000061946	OTTHUMP00000067396	24	17	19	11	21	22	28	21	45	34	41	24	19	24	16	8
IPI00028881	O95167	Q6FGG4	ENSP00000302490	NP_004533	HIT000260227	OTTHUMP00000067461	2	0	1	0	0	1	0	1	1	0	0	2	0	1	0	0
IPI00657989						OTTHUMP00000067464	0	0	0	0	0	0	0	0	0	0	0	0	0	0	1	0
IPI00152068	Q8TAK6	Q59EM0	ENSP00000331066	NP_620450	HIT000051103	OTTHUMP00000067600	0	0	0	0	0	0	0	0	0	0	0	1	0	0	0	0
IPI00007611	P48047	Q53HH2	ENSP00000290299	NP_001688	HIT000323942	OTTHUMP00000067745	40	33	30	28	44	42	34	41	23	27	24	38	47	40	27	20
IPI00437697		Q5U682	ENSP00000365714	NP_001005367		OTTHUMP00000068180		1	0	2	0	3	3	3	3	4	3	6	1	2	1	1	33
IPI00305668	P82932		ENSP00000355154	NP_115865	HIT000084037	OTTHUMP00000068540	0	0	0	0	0	0	0	1	1	0	0	0	0	0	0	0
IPI00030741	O95447	Q3ZCT0	ENSP00000288350	NP_689718	HIT000097474	OTTHUMP00000069084	0	0	0	0	0	0	0	0	0	0	0	0	0	1	0	0
IPI00428732	P58401		ENSP00000301894	NP_620063		OTTHUMP00000069171		0	0	0	0	0	1	0	1	0	0	0	0	0	0	0	2
IPI00169174	Q8NH64	Q6IFH8	ENSP00000352305	NP_001004749		OTTHUMP00000069316		0	0	0	0	0	0	0	0	0	0	0	1	0	0	0	1
IPI00657706		Q7L5N2	ENSP00000245615	NP_077274	HIT000042662	OTTHUMP00000069334	3	0	1	0	2	2	1	1	0	0	1	1	1	1	0	0
IPI00473011	P02042		ENSP00000369654	NP_000510	HIT000083484	OTTHUMP00000069639	13	10	11	8	16	19	7	5	19	27	13	23	27	23	12	15
IPI00217471	P02100	Q6FH44	ENSP00000292896	NP_005321	HIT000037174	OTTHUMP00000069642	1	2	1	0	0	0	0	0	3	2	0	0	1	2	0	0
IPI00301096	Q9H339		ENSP00000300773	NP_001005567		OTTHUMP00000069643		0	0	1	0	0	2	0	0	0	0	0	0	0	0	0	3
IPI00654755	P68871	O95408	ENSP00000333994	NP_000509	HIT000194975	OTTHUMP00000069644	289	246	178	109	188	179	95	85	183	159	175	155	225	246	130	130
IPI00017184	Q9H4M9	Q2M3Q4	ENSP00000320516	NP_006786	HIT000022696	OTTHUMP00000069746	1	0	2	0	5	3	1	1	4	1	2	4	1	2	0	0
IPI00218130	P11217		ENSP00000164139	NP_005600	HIT000065530	OTTHUMP00000069755	18	8	13	6	20	23	4	7	6	13	15	15	2	4	10	6
IPI00328301		Q6ZRU1	ENSP00000312046	NP_659490	HIT000013869	OTTHUMP00000069822	0	0	0	0	0	0	0	1	0	0	0	0	0	0	0	0
IPI00641706						OTTHUMP00000071699	0	0	0	0	0	0	0	0	0	0	0	0	0	0	2	0
IPI00001091	Q9Y4W6	Q6P1L0	ENSP00000269143	NP_006787	HIT000326080	OTTHUMP00000071704	4	2	0	0	3	2	0	0	5	11	7	8	0	0	0	0
IPI00290799		Q96ND0	ENSP00000323635	NP_689565	HIT000012232	OTTHUMP00000071760	2	1	2	0	2	0	2	2	1	0	0	0	0	0	0	0
IPI00219913	P54578	Q53XY5	ENSP00000261601	NP_005142	HIT000031594	OTTHUMP00000071807	13	8	7	1	13	20	7	13	14	15	15	9	8	13	4	4
IPI00293817	Q99747	Q6FHY4	ENSP00000324628	NP_003817	HIT000221406	OTTHUMP00000071876	15	11	13	9	9	11	10	13	12	11	14	12	12	9	8	6
IPI00419932		Q6IQ22	ENSP00000331748	NP_001020471	HIT000099160	OTTHUMP00000071895	0	0	0	0	0	1	1	1	0	1	0	0	0	0	1	1
IPI00012510	Q9BXX0		ENSP00000254528	NP_114437	HIT000075770	OTTHUMP00000071913	0	0	0	0	0	0	0	0	0	0	1	0	0	0	0	0
IPI00434580		Q6H969	ENSP00000348821	NP_003794		OTTHUMP00000071924		0	0	0	0	0	1	0	0	0	0	0	0	0	0	0	1
IPI00032230	Q9Y2J2		ENSP00000343158	NP_036439	HIT000000704	OTTHUMP00000071983	12	8	9	5	9	12	12	10	13	13	14	19	7	7	6	6
IPI00215716	Q9Y2J2		ENSP00000341138			OTTHUMP00000071987	0	0	0	1	1	0	2	0	4	7	4	2	0	1	0	0
IPI00440493	P25705	Q53XX6	ENSP00000282050	NP_001001937	HIT000049010	OTTHUMP00000072923	287	234	205	123	261	290	224	228	213	189	240	245	105	103	116	89
IPI00431083	Q96CS2			XP_001129608		OTTHUMP00000072941		0	0	0	0	0	0	0	0	0	0	0	0	0	0	0	1
IPI00641485						OTTHUMP00000072945	0	0	0	0	0	0	0	0	0	0	0	0	1	0	0	0
IPI00017174		Q9H8F1	ENSP00000269218			OTTHUMP00000072972	0	0	0	0	1	0	0	0	0	0	0	0	0	0	0	0
IPI00644753						OTTHUMP00000072980	0	0	0	0	0	0	0	0	0	0	1	0	0	0	0	0
IPI00177728	Q96KP4	Q9NUV1	ENSP00000325548	NP_060705	HIT000030359	OTTHUMP00000073036	18	10	7	7	18	19	19	12	19	19	29	27	32	37	50	30
IPI00064667	Q96KN2	Q14D40	ENSP00000351682	NP_116038	HIT000252800	OTTHUMP00000073044	0	0	0	0	0	0	0	0	0	0	0	0	2	0	0	0
IPI00396022	O43861	Q6ZS89	ENSP00000304500	NP_940933	HIT000054644	OTTHUMP00000073082	0	0	0	0	0	0	0	0	0	0	1	0	0	0	0	0
IPI00302850	P62314	Q7Z5A3	ENSP00000300413	NP_008869	HIT000293006	OTTHUMP00000073086	4	3	3	2	2	2	0	0	3	6	9	4	0	4	2	1
IPI00141940					HIT000042952	OTTHUMP00000073118	1	0	0	0	0	0	0	0	0	0	0	0	0	0	0	0
IPI00025753	Q02413		ENSP00000257192	NP_001933	HIT000068518	OTTHUMP00000073169	0	0	0	0	0	0	0	0	0	0	0	0	4	3	0	0
IPI00001539	P42765		ENSP00000285093	NP_006102	HIT000100577	OTTHUMP00000073215	7	1	1	0	7	8	4	5	10	11	14	14	1	2	0	2
IPI00181911		Q0VAJ2	ENSP00000306598	NP_694943	HIT000015947	OTTHUMP00000073299	0	0	0	0	0	0	0	0	0	0	0	0	1	1	0	0
IPI00166738	Q8N4Q0	Q4G1C4	ENSP00000323678	NP_787103	HIT000265748	OTTHUMP00000073365	2	0	0	0	5	6	2	2	0	0	0	0	0	0	0	0
IPI00748250		Q59GK7	ENSP00000283365	NP_116757		OTTHUMP00000073427		1	0	1	0	1	1	0	0	0	2	5	4	0	1	1	17
IPI00003420	Q15555	Q0JSD3	ENSP00000300249	NP_055083	HIT000033142	OTTHUMP00000073450	16	16	14	8	16	16	10	7	9	8	6	9	2	8	9	13
IPI00010491	O00194		ENSP00000262094	NP_004154	HIT000077614	OTTHUMP00000073466	0	0	1	0	0	0	1	2	0	3	2	0	0	0	0	0
IPI00306960	O43776		ENSP00000256854	NP_004530	HIT000030576	OTTHUMP00000073551	4	1	6	0	3	5	4	4	12	11	11	7	2	3	3	1
IPI00646010		Q6ZUX0	ENSP00000354991	NP_443179	HIT000056443	OTTHUMP00000073563	0	0	0	1	0	0	0	0	0	0	1	0	0	0	0	0
IPI00219436	Q9BY50		ENSP00000299714	NP_150596	HIT000002277	OTTHUMP00000073573	0	0	0	0	0	0	0	0	1	0	2	0	0	0	0	0
IPI00026530	P49257	Q53FS4	ENSP00000251047	NP_005561	HIT000217931	OTTHUMP00000073585	1	0	0	0	0	1	1	0	0	0	1	0	0	0	0	0
IPI00007166		Q9Y5U9	ENSP00000256433	NP_057181	HIT000010382	OTTHUMP00000073624	0	0	0	0	1	0	0	0	0	0	0	0	0	0	0	0
IPI00101291		Q96ES0	ENSP00000299783	NP_065905	HIT000057128	OTTHUMP00000073632	1	1	1	2	3	5	5	2	5	2	1	3	0	2	0	0
IPI00182728	O75351	Q69HW4	ENSP00000238497	NP_004860	HIT000073647	OTTHUMP00000073674	2	0	2	2	1	1	1	0	0	0	3	3	2	3	1	1
IPI00299755	Q8NEB9		ENSP00000262039	NP_002638	HIT000041756	OTTHUMP00000073689	0	0	0	0	0	0	0	0	1	0	1	0	0	0	0	0
IPI00013808	O43707	Q96BG6	ENSP00000252699	NP_004915	HIT000032172	OTTHUMP00000076071	22	10	14	9	24	23	18	11	24	18	16	16	15	11	27	13
IPI00032516	Q9BXS5	Q4TTY5	ENSP00000291439	NP_115882	HIT000038020	OTTHUMP00000076090	3	1	3	1	7	6	3	4	6	2	7	3	0	0	2	0
IPI00219840	P53680		ENSP00000263270	NP_004060	HIT000288877	OTTHUMP00000076095	8	5	1	1	18	15	9	11	11	4	2	1	0	0	0	0
IPI00021842	P02649	Q13791	ENSP00000252486	NP_000032		OTTHUMP00000076108		3	1	3	1	1	6	6	6	3	4	12	3	2	5	2	58
IPI00302840	P13637	Q53ES0	ENSP00000302397	NP_689509	HIT000034253	OTTHUMP00000076119	107	80	83	55	106	104	96	110	121	130	158	136	77	74	80	69
IPI00218919	P20648	Q53FM3	ENSP00000262623	NP_000695	HIT000014638	OTTHUMP00000076120	0	0	0	0	0	0	0	0	0	0	3	3	0	0	0	0
IPI00024920	P30049	Q6FG90	ENSP00000215375	NP_001001975	HIT000038255	OTTHUMP00000076121	14	10	11	5	20	17	10	14	28	19	12	17	2	2	3	2
IPI00102423	Q96P09	Q6IPY1	ENSP00000321377	NP_203127	HIT000079388	OTTHUMP00000076152	0	0	0	0	0	0	1	0	0	0	0	0	0	0	0	0
IPI00056357	Q969H8		ENSP00000262947	NP_061980	HIT000034822	OTTHUMP00000076167	2	0	3	0	2	2	0	0	0	0	0	0	0	0	1	1
IPI00187011	Q9UPT8		ENSP00000253048	XP_028253	HIT000000781	OTTHUMP00000076173	0	0	0	0	0	0	1	0	0	0	0	0	0	0	0	0
IPI00020599	P27797	Q3B830	ENSP00000320866	NP_004334	HIT000283506	OTTHUMP00000076188	13	5	6	0	16	22	13	14	12	7	14	12	4	11	10	8
IPI00418873	Q6ZSI9		ENSP00000331636	NP_653292	HIT000047271	OTTHUMP00000076191	0	0	0	1	0	0	0	0	0	0	0	0	0	0	0	0
IPI00025084	P04632		ENSP00000246533	NP_001003962	HIT000321011	OTTHUMP00000076192	11	3	8	1	4	4	5	7	10	8	14	8	4	10	6	6
IPI00013122	Q16543	Q0JTJ9	ENSP00000222005	NP_008996	HIT000304645	OTTHUMP00000076237	8	3	4	1	17	13	9	12	7	7	7	8	6	3	1	4
IPI00180954	Q14011	Q53XX5	ENSP00000322887	NP_001271	HIT000101738	OTTHUMP00000076279	4	3	1	0	2	1	0	2	2	6	6	3	1	1	4	1
IPI00293126	Q99426	Q6FGY5	ENSP00000221855	NP_001272	HIT000287190	OTTHUMP00000076280	5	1	4	0	6	8	7	4	12	7	9	5	9	7	10	8
IPI00027487	P06732		ENSP00000221476	NP_001815	HIT000049149	OTTHUMP00000076281	0	2	0	0	0	1	0	0	4	1	0	1	0	1	0	0
IPI00216085	P14854		ENSP00000246554	NP_001854	HIT000030070	OTTHUMP00000076299	25	21	17	16	30	35	24	19	19	17	22	26	16	21	18	16
IPI00306720	P24310	Q6FGI7	ENSP00000292907	NP_001855	HIT000031160	OTTHUMP00000076300	0	0	0	0	0	0	0	0	0	0	1	0	0	0	0	0
IPI00159927	O14594	Q4LE67	ENSP00000252575	NP_004377	HIT000062827	OTTHUMP00000076314	20	6	17	6	34	28	17	16	10	13	8	17	4	2	5	4
IPI00293074	Q8IWA5		ENSP00000369988			OTTHUMP00000076316	0	0	0	0	1	0	0	0	0	0	0	0	0	0	0	0
IPI00549521	Q8IWA5		ENSP00000336888	NP_065161		OTTHUMP00000076317		2	1	1	0	0	1	1	1	0	0	1	2	0	0	0	10
IPI00019160	P78329	Q6NWT5	ENSP00000221700	NP_001073	HIT000101154	OTTHUMP00000076335	0	0	0	0	0	0	0	0	0	0	0	1	0	0	0	0
IPI00024332	P98187		ENSP00000314398	NP_009184	HIT000070969	OTTHUMP00000076338	0	0	0	0	0	0	0	0	0	0	1	0	0	0	0	0
IPI00004470		Q9UQ10	ENSP00000221403	NP_055290	HIT000041697	OTTHUMP00000076353	4	1	2	0	0	0	1	0	0	0	0	0	0	0	0	0
IPI00002919	O95057		ENSP00000325836	NP_660156	HIT000041095	OTTHUMP00000076357	0	0	0	0	0	0	0	0	1	0	0	0	0	0	0	0
IPI00032780		Q5XX09	ENSP00000314343	NP_060062	HIT000044502	OTTHUMP00000076373	0	0	0	0	0	0	0	1	0	0	0	0	0	0	0	0
IPI00300221		Q9H0J5				OTTHUMP00000076375		0	0	0	0	1	0	0	0	0	0	0	0	0	0	0	1
IPI00300241	Q9NT99		ENSP00000373853	XP_292778	HIT000092669	OTTHUMP00000076383	2	0	1	2	0	1	0	0	0	0	0	0	0	0	0	0
IPI00455397	Q09019		ENSP00000270223	NP_004934	HIT000192330	OTTHUMP00000076393	1	0	0	0	0	0	2	2	0	0	0	0	0	0	0	1
IPI00015947	P25685	Q6FHS4	ENSP00000254322	NP_006136	HIT000101520	OTTHUMP00000076394	0	0	0	0	2	5	2	2	0	3	0	2	0	0	1	1
IPI00011416	Q13011		ENSP00000221418	NP_001389	HIT000218347	OTTHUMP00000076418	0	0	0	0	0	0	0	0	12	8	8	9	0	4	2	0
IPI00021534	O95977		ENSP00000246115	NP_003766	HIT000036932	OTTHUMP00000076421	0	0	1	0	0	0	0	0	0	0	0	0	0	0	0	0
IPI00186290	P13639	Q58J86	ENSP00000307940	NP_001952	HIT000326370	OTTHUMP00000076424	30	14	28	13	15	28	10	8	24	24	38	30	14	9	16	10
IPI00100980	Q9NZN4	Q8NCJ3	ENSP00000263277	NP_055416	HIT000036704	OTTHUMP00000076432	2	0	1	0	1	1	0	1	0	2	0	0	0	0	0	0
IPI00290460	O75821	Q6IAM0	ENSP00000253108	NP_003746	HIT000033812	OTTHUMP00000076433	1	0	1	0	1	0	2	0	1	1	0	0	0	0	0	0
IPI00301936	Q15717	Q53XN6	ENSP00000264073	NP_001410	HIT000031527	OTTHUMP00000076435	0	0	2	0	1	3	4	2	0	2	0	0	0	0	0	0
IPI00397365	Q9Y6I3			NP_037465		OTTHUMP00000076457		0	0	0	0	0	0	0	0	0	0	2	0	0	0	0	2
IPI00163849	Q9UBC2		ENSP00000248070	NP_067058	HIT000058425	OTTHUMP00000076461	4	4	7	3	13	12	15	19	18	5	10	9	5	4	4	1
IPI00006876	Q9BTL4		ENSP00000292433	NP_004898	HIT000264877	OTTHUMP00000076477	0	0	0	0	0	0	0	0	0	0	0	0	0	0	0	1
IPI00297396	Q8N1G1		ENSP00000170168	NP_065746	HIT000000854	OTTHUMP00000076478	0	0	1	0	0	0	0	0	0	0	0	0	0	0	0	0
IPI00031820	Q9Y285	Q6IBR2	ENSP00000320309	NP_004452	HIT000049466	OTTHUMP00000076482	11	10	8	7	10	10	7	8	13	15	16	9	4	2	3	0
IPI00438355	Q75N90		ENSP00000270509	NP_115823	HIT000084872	OTTHUMP00000076486	0	0	0	0	0	0	0	0	0	0	0	0	1	0	0	0
IPI00470771		Q5PRF9	ENSP00000317224	NP_060498	HIT000259457	OTTHUMP00000076515	0	0	0	0	0	0	0	0	0	0	1	0	0	0	0	0
IPI00328220	Q8WXB4	Q9H7U2	ENSP00000343617	NP_079303	HIT000079926	OTTHUMP00000076558	0	0	0	0	0	0	0	1	0	0	0	0	0	0	0	0
IPI00550380		Q9BU41	ENSP00000253047	NP_060324	HIT000031281	OTTHUMP00000076581	0	0	0	0	0	0	0	0	0	2	1	1	0	0	0	0
IPI00168166		Q8NAX4		NP_060437		OTTHUMP00000076589		0	0	0	1	0	0	0	0	0	0	0	0	0	0	0	2
IPI00018081		Q9H3X1	ENSP00000330326	XP_001130459	HIT000298697	OTTHUMP00000076599	2	3	3	0	2	3	0	1	0	0	0	0	1	1	0	0
IPI00043606	Q96ND8		ENSP00000291598	NP_689691	HIT000012206	OTTHUMP00000076630	0	0	0	0	0	0	0	0	0	0	0	0	0	0	1	0
IPI00183980		Q6NVH7	ENSP00000310008	NP_787067	HIT000017305	OTTHUMP00000076658	0	0	0	0	1	0	0	0	0	0	0	0	0	0	0	0
IPI00298662		Q8N9R7	ENSP00000335309	NP_689695	HIT000018842	OTTHUMP00000076670	0	0	1	0	0	0	0	0	0	0	0	0	0	0	1	1
IPI00217791		Q8IYK2	ENSP00000292574	NP_775753	HIT000022538	OTTHUMP00000076688	0	0	0	1	0	0	0	0	0	0	0	0	0	0	0	0
IPI00414112		Q3KP31	ENSP00000342974	NP_699189	HIT000081912	OTTHUMP00000076689	0	0	0	0	1	0	0	0	0	0	0	0	0	0	0	0
IPI00305827		Q9BTV5	ENSP00000221856	NP_077309	HIT000083359	OTTHUMP00000076702	2	0	1	0	1	0	2	4	3	3	1	2	3	1	0	2
IPI00375676	P02792	Q6IBT7	ENSP00000366525	NP_000137	HIT000049462	OTTHUMP00000076704	0	0	1	0	2	1	0	0	2	5	13	9	2	6	19	15
IPI00010442	O00168		ENSP00000343314	NP_005022	HIT000041726	OTTHUMP00000076716	0	0	0	0	4	2	4	4	0	0	0	0	0	0	0	0
IPI00067920	P58549		ENSP00000270310	NP_071289	HIT000038369	OTTHUMP00000076722	2	2	2	0	2	4	2	4	2	4	7	10	1	2	2	0
IPI00030182	Q14353		ENSP00000252288	NP_000147	HIT000302135	OTTHUMP00000076728	2	0	0	0	0	0	3	0	0	2	0	0	1	0	0	0
IPI00022430	O14556		ENSP00000222286	NP_055179	HIT000051685	OTTHUMP00000076730	0	0	0	0	0	0	0	0	1	0	0	0	0	0	0	0
IPI00305551	P29992	Q59FM5	ENSP00000078429	NP_002058	HIT000266221	OTTHUMP00000076749	9	2	5	2	7	7	2	0	4	6	7	9	4	4	5	5
IPI00027243	P30679	Q53XK2	ENSP00000262958	NP_002059	HIT000196088	OTTHUMP00000076751	0	0	0	0	0	0	0	0	0	1	0	0	0	0	0	0
IPI00028509	O60262		ENSP00000326294	NP_443079	HIT000036718	OTTHUMP00000076752	5	0	1	0	4	1	3	3	3	3	5	7	6	4	5	10
IPI00027497	P06744	Q9BRD3	ENSP00000348877	NP_000166	HIT000049155	OTTHUMP00000076759	75	59	68	48	88	103	96	82	76	89	103	73	74	63	68	80
IPI00100656	Q9NZ01	Q6IBB2	ENSP00000215567	NP_612510	HIT000277229	OTTHUMP00000076769	0	1	0	0	2	2	1	0	0	0	0	2	1	1	0	1
IPI00219685	Q9P0J0		ENSP00000252576	NP_057049	HIT000002426	OTTHUMP00000076776	5	1	5	3	5	3	2	1	2	3	7	4	6	2	1	4
IPI00292228	P49840	Q68D16	ENSP00000222330	NP_063937	HIT000289765	OTTHUMP00000076782	2	1	2	0	2	5	1	0	1	2	2	0	0	0	0	1
IPI00218946	Q9UL51		ENSP00000251287	NP_001185	HIT000244590	OTTHUMP00000076797	0	2	1	0	3	3	0	0	2	2	2	2	2	0	0	0
IPI00171903	P52272	Q59ES8	ENSP00000325376	NP_005959		OTTHUMP00000076814		3	2	6	5	8	6	7	11	6	4	0	1	3	6	2	71
IPI00100748	Q9NZL4		ENSP00000255631	NP_036399	HIT000074241	OTTHUMP00000076829	0	0	0	0	0	0	0	0	0	1	0	0	0	0	0	0
IPI00743302		Q8N6I2	ENSP00000221980	NP_003250	HIT000221193	OTTHUMP00000076845	13	7	12	6	14	19	7	10	6	14	15	12	0	3	1	0
IPI00554541		O43341	ENSP00000263383	NP_006835	HIT000035402	OTTHUMP00000076863	3	1	0	0	2	2	1	0	5	3	0	1	2	2	1	1
IPI00647213					HIT000094845	OTTHUMP00000076893	0	0	0	0	0	1	0	0	0	0	0	0	0	0	0	0
IPI00027883	Q9Y2H9		ENSP00000251472	NP_055790	HIT000000690	OTTHUMP00000076897	0	0	0	0	0	1	0	0	0	0	0	0	0	0	0	0
IPI00642491			ENSP00000368165	NP_001036096	HIT000086756	OTTHUMP00000076912	0	0	0	0	0	0	0	0	0	0	0	0	0	1	0	0
IPI00167241	Q8N7M2	Q6RFR4	ENSP00000333199		HIT000023005	OTTHUMP00000076920	0	0	0	0	0	0	0	0	0	0	0	0	0	0	1	0
IPI00166796		Q8N4W5	ENSP00000315232		HIT000041852	OTTHUMP00000076927	0	0	0	0	0	0	0	0	0	0	0	0	0	0	0	1
IPI00294218		Q6ECI4	ENSP00000333223	NP_001001668	HIT000254885	OTTHUMP00000076943	0	0	0	0	0	0	0	0	0	0	0	1	0	0	0	0
IPI00644875						OTTHUMP00000076951	0	0	0	0	0	0	0	0	0	0	0	1	0	0	0	0
IPI00184772	Q96HP0		ENSP00000321556	NP_065863	HIT000001110	OTTHUMP00000076961	0	0	0	0	0	0	0	0	0	0	0	0	0	1	0	0
IPI00644388		Q6ZVD1	ENSP00000366883		HIT000044593	OTTHUMP00000076999	0	0	1	0	0	0	0	0	0	0	0	0	0	0	0	0
IPI00644467						OTTHUMP00000077028	0	0	0	0	0	0	0	1	0	0	0	0	0	0	0	0
IPI00479786		Q59EZ9	ENSP00000201886	NP_003676	HIT000266093	OTTHUMP00000077049	6	5	12	11	12	7	1	5	8	4	7	4	15	14	5	3
IPI00297254	O60292		ENSP00000222345	NP_055888	HIT000000262	OTTHUMP00000077054	0	0	1	0	0	0	0	0	0	0	0	0	0	0	0	0
IPI00164441	Q9UPW8		ENSP00000252773	XP_038604	HIT000000749	OTTHUMP00000077061	3	0	4	2	0	1	0	0	1	2	3	0	0	0	0	0
IPI00738937	Q9ULL5		ENSP00000246798	XP_940214	HIT000000921	OTTHUMP00000077069	0	0	0	1	0	0	0	0	0	0	0	0	0	0	0	0
IPI00001743	Q63HK5	Q0JSR6	ENSP00000240587	NP_065907	HIT000057392	OTTHUMP00000077072	1	0	0	0	0	0	0	0	0	0	0	0	0	0	0	0
IPI00640524				XP_048362		OTTHUMP00000077080		0	0	0	0	0	1	0	1	3	0	0	0	0	0	0	6
IPI00140833		Q4G0U1	ENSP00000270238	XP_055866	HIT000001598	OTTHUMP00000077093	2	0	1	1	1	0	0	0	1	0	0	0	0	0	0	0
IPI00152845	Q8TF45	Q2M1S2	ENSP00000351292	NP_597717	HIT000257280	OTTHUMP00000077095	0	0	0	0	0	0	0	0	0	0	0	1	0	0	0	0
IPI00739203		Q8N3H7	ENSP00000328677	XP_065166	HIT000001672	OTTHUMP00000077097	0	0	0	0	0	0	0	0	2	1	0	0	0	0	0	0
IPI00166060	Q8N135	Q658V8	ENSP00000312273	NP_644813	HIT000248159	OTTHUMP00000077185	0	0	0	0	0	0	0	0	0	1	0	0	1	0	1	0
IPI00009771	Q03252		ENSP00000327054	NP_116126	HIT000278695	OTTHUMP00000077225	6	1	1	5	6	5	8	9	9	8	10	2	4	4	4	0
IPI00060627		Q96CT7	ENSP00000262801	NP_612451	HIT000036420	OTTHUMP00000077229	0	0	0	0	0	2	0	1	0	0	0	0	0	0	0	0
IPI00060473		Q96CN4	ENSP00000270530	NP_660288	HIT000036527	OTTHUMP00000077230	0	0	2	0	0	0	0	0	0	0	0	0	0	0	0	0
IPI00044689		Q0VGE8	ENSP00000350295	NP_001026835		OTTHUMP00000077235		0	0	0	0	0	0	0	0	0	0	0	0	0	0	0	1
IPI00329373		Q5XKP0	ENSP00000309561	NP_991330	HIT000087324	OTTHUMP00000077241	1	0	0	0	0	1	0	0	0	0	0	0	1	2	2	2
IPI00103925		Q8WZA9	ENSP00000300809	NP_001007562	HIT000077421	OTTHUMP00000077251	2	0	2	0	3	6	2	2	0	3	2	0	2	1	0	2
IPI00394804		Q6ZS11	ENSP00000340369	NP_940847	HIT000047681	OTTHUMP00000077256	0	0	0	0	0	0	0	0	0	0	0	0	0	0	1	0
IPI00043784		Q96NP5	ENSP00000301439	XP_001134208	HIT000011579	OTTHUMP00000077265	0	0	0	0	0	0	0	0	1	0	0	0	0	0	0	0
IPI00455667			ENSP00000270642	XP_380008	HIT000271417	OTTHUMP00000077292	0	0	0	0	0	0	0	0	2	0	0	0	0	0	0	0
IPI00556144		Q5BKX5	ENSP00000367564			OTTHUMP00000077327	0	2	0	0	0	0	0	0	0	0	0	0	0	0	0	0
IPI00251335						OTTHUMP00000077365	0	0	0	0	0	0	0	0	1	0	0	0	0	0	0	0
IPI00640178	Q86V71	Q9BZE6	ENSP00000303533	NP_001001415	HIT000085674	OTTHUMP00000077386	0	0	0	0	0	0	0	0	1	0	0	0	0	0	0	0
IPI00307749	O75251	Q2T9H7	ENSP00000233627	NP_077718	HIT000032550	OTTHUMP00000077392	6	0	5	2	5	5	4	3	5	5	6	9	3	0	1	2
IPI00373927	Q32M78		ENSP00000311596	NP_940937	HIT000020318	OTTHUMP00000077397	0	0	0	0	1	0	0	0	0	0	0	0	0	0	1	0
IPI00063130		Q6UW68	ENSP00000222124	NP_940938	HIT000302413	OTTHUMP00000077400	2	0	1	0	0	0	2	0	1	2	2	0	0	0	0	0
IPI00477845		Q86Y87	ENSP00000334762			OTTHUMP00000077431	0	0	0	0	0	0	0	0	0	0	0	0	0	0	0	1
IPI00376151				XP_372723		OTTHUMP00000077432		0	0	0	0	0	0	0	0	0	0	0	0	0	0	1	1
IPI00294955	Q9Y4Z0		ENSP00000252816	NP_036453	HIT000001924	OTTHUMP00000077487	0	0	0	0	0	0	0	0	0	1	0	0	0	0	0	0
IPI00026237	P20916	Q53ES7	ENSP00000262624	NP_002352	HIT000195308	OTTHUMP00000077499	5	2	0	2	8	9	14	12	11	5	11	11	21	27	37	26
IPI00003783	P36507	Q7Z370	ENSP00000262948	NP_109587	HIT000029656	OTTHUMP00000077502	3	0	2	0	2	2	0	1	2	2	3	1	1	1	1	0
IPI00028481	P61006	Q6FHV5	ENSP00000300935	NP_005361	HIT000008439	OTTHUMP00000077537	0	1	0	0	0	0	0	0	0	0	0	0	0	0	0	0
IPI00217920		Q86YF0	ENSP00000293350	NP_699160	HIT000050604	OTTHUMP00000077538	0	0	0	0	0	1	0	0	0	0	0	0	0	0	0	0
IPI00100922	Q96SK3	Q59G67	ENSP00000347338	NP_116078		OTTHUMP00000077556		1	0	0	0	0	0	0	0	0	0	0	0	0	0	0	1
IPI00640316					HIT000014971	OTTHUMP00000077566	0	0	0	0	0	0	0	0	0	0	0	0	0	0	0	1
IPI00440693		Q6P4F2	ENSP00000370134	NP_001026904	HIT000260920	OTTHUMP00000077572	0	0	0	0	0	0	0	1	1	0	1	1	0	0	0	0
IPI00031526		Q9BQ61	ENSP00000242784	NP_076943	HIT000289216	OTTHUMP00000077606	0	0	0	1	0	0	0	0	0	0	0	0	0	0	0	0
IPI00059764		Q6X3Y3	ENSP00000300811	NP_872304	HIT000251264	OTTHUMP00000077658	0	0	0	0	1	0	0	0	1	0	0	0	0	0	0	0
IPI00396114	Q9HBH9		ENSP00000250896	NP_951009		OTTHUMP00000077670		0	0	0	0	0	0	0	0	0	0	0	1	0	0	0	1
IPI00456373	Q99687		ENSP00000333552	NP_064545	HIT000039932	OTTHUMP00000077674	1	0	0	0	0	0	0	0	0	0	0	0	0	0	0	0
IPI00420053		Q96IK3	ENSP00000263354	NP_003818	HIT000280180	OTTHUMP00000077709	11	2	7	3	10	10	12	17	18	17	10	14	7	14	6	3
IPI00329301	Q86Y39		ENSP00000311740	NP_783313	HIT000263221	OTTHUMP00000077715	3	0	3	2	1	1	3	1	4	2	2	2	0	0	1	0
IPI00452731	O95182	Q32Q14	ENSP00000301457	NP_004992	HIT000031430	OTTHUMP00000077719	9	5	3	3	15	9	11	9	11	9	9	4	4	1	4	3
IPI00219772	P17568	Q6ICN9	ENSP00000215565	NP_004137	HIT000290121	OTTHUMP00000077720	4	0	1	0	4	2	1	1	0	0	5	5	0	1	0	1
IPI00006408		Q96FD2	ENSP00000343497	NP_057037	HIT000034781	OTTHUMP00000077729	0	0	0	1	0	0	0	0	0	0	0	0	0	0	0	0
IPI00156005	Q9UNW9	Q9HDB7	ENSP00000263257	NP_002507	HIT000066591	OTTHUMP00000077732	1	0	0	0	0	1	0	0	2	0	4	0	0	0	0	0
IPI00295542	Q02818	Q53GX6	ENSP00000263273	NP_006175	HIT000196937	OTTHUMP00000077744	2	1	0	1	4	0	0	2	3	1	4	2	0	0	0	0
IPI00002560	Q9Y6R0	Q9Y4I7	ENSP00000252891	NP_004747	HIT000062300	OTTHUMP00000077745	1	0	0	0	1	2	1	3	0	0	0	0	0	0	0	0
IPI00219773	P54368	Q2M222	ENSP00000314813	NP_004143	HIT000097191	OTTHUMP00000077752	0	0	0	0	1	0	0	0	0	0	0	0	0	0	0	0
IPI00382701	Q96RA2	Q6IFJ7	ENSP00000345563	NP_787079	HIT000020323	OTTHUMP00000077764	0	0	0	0	0	0	0	0	0	0	0	0	0	0	1	0
IPI00014808	Q15102	Q53X88	ENSP00000262890	NP_002564	HIT000031362	OTTHUMP00000077772	5	2	3	4	4	5	2	4	3	4	0	4	0	4	2	1
IPI00301023	O75781		ENSP00000341911	NP_002570	HIT000041541	OTTHUMP00000077779	0	1	2	1	0	1	0	0	0	0	0	1	0	0	0	0
IPI00220002	O75781		ENSP00000264560	NP_001035224		OTTHUMP00000077780		2	1	0	2	1	1	0	0	0	0	2	1	0	0	0	10
IPI00023640	O14737		ENSP00000221784	NP_004699	HIT000037159	OTTHUMP00000077786	4	3	6	0	4	6	3	2	2	1	2	2	2	2	3	1
IPI00257882	P12955		ENSP00000244137	NP_000276	HIT000036969	OTTHUMP00000077805	0	0	1	0	0	0	0	0	1	1	0	0	0	0	2	0
IPI00029997	O95336		ENSP00000252603	NP_036220	HIT000036464	OTTHUMP00000077808	1	0	0	0	0	2	2	0	2	1	3	0	1	2	2	2
IPI00013723	Q13526	Q53X75	ENSP00000247970	NP_006212	HIT000220076	OTTHUMP00000077817	13	3	6	4	14	14	13	13	15	17	21	14	9	12	2	4
IPI00029009	O60331	Q7LE22	ENSP00000335333	NP_036530	HIT000000306	OTTHUMP00000077819	2	1	1	0	2	1	5	1	4	3	4	11	0	0	0	1
IPI00059135	Q96A00		ENSP00000301242	NP_150281	HIT000303121	OTTHUMP00000077850	8	6	3	2	7	7	10	6	5	9	11	8	16	19	14	22
IPI00019812	P53041	Q53FR0	ENSP00000012443	NP_006238	HIT000030795	OTTHUMP00000077855	2	3	4	2	2	4	0	1	7	2	3	3	1	0	3	2
IPI00027350	P32119		ENSP00000301522	NP_005800	HIT000277909	OTTHUMP00000077857	40	33	23	17	48	44	30	18	52	45	30	33	20	35	36	22
IPI00005694	P11465	Q9UML9	ENSP00000251275	NP_112536		OTTHUMP00000077886		0	0	0	0	0	0	0	0	1	0	0	0	0	0	0	1
IPI00010201	P48556	Q5U0B3	ENSP00000215071	NP_002803	HIT000286074	OTTHUMP00000077903	1	0	0	0	2	3	2	2	0	4	3	2	0	0	0	0
IPI00030203	O60542		ENSP00000245810	NP_004149	HIT000063628	OTTHUMP00000077905	0	0	0	1	0	0	0	0	0	0	0	0	0	0	0	0
IPI00020436	Q15907	Q2YDT2	ENSP00000333547	NP_004209	HIT000271476	OTTHUMP00000077935	9	1	7	2	8	7	2	7	8	12	13	7	1	3	4	1
IPI00023504	P20336		ENSP00000222256	NP_002857	HIT000035450	OTTHUMP00000077936	65	41	83	48	56	80	57	67	50	51	51	56	11	14	14	10
IPI00008219	P54725	Q59EU8	ENSP00000321365	NP_005044	HIT000036476	OTTHUMP00000077942	1	2	1	2	2	0	0	0	2	6	0	2	5	4	3	3
IPI00221034	Q01201		ENSP00000221452	NP_006500	HIT000196521	OTTHUMP00000077961	0	0	0	1	0	0	0	0	0	0	0	0	0	0	0	0
IPI00024705	O14908		ENSP00000340698	NP_005707	HIT000029597	OTTHUMP00000077972	1	0	0	0	0	0	0	0	0	0	0	0	1	2	0	1
IPI00215719	Q07020	Q0QEW2	ENSP00000084795	NP_000970	HIT000277691	OTTHUMP00000077979	1	0	2	0	0	0	0	0	1	1	0	1	0	0	0	0
IPI00221092	P62249		ENSP00000251453	NP_001011	HIT000031865	OTTHUMP00000077987	1	0	1	2	1	2	0	2	2	2	1	2	2	2	2	0
IPI00215780	P39019	Q8WVX7	ENSP00000221975	NP_001013	HIT000038368	OTTHUMP00000077988	0	0	0	0	1	2	0	0	1	1	0	0	2	1	1	0
IPI00008433	P46782	Q53G25	ENSP00000196551	NP_001000	HIT000089748	OTTHUMP00000077991	1	1	1	1	1	3	1	1	1	0	1	1	1	2	0	1
IPI00020418	P10301	Q6FH12	ENSP00000246792	NP_006261	HIT000037527	OTTHUMP00000077994	0	0	0	0	0	0	0	0	0	1	0	0	0	0	0	0
IPI00009104	Q9Y230	Q6FIB9	ENSP00000221413	NP_006657	HIT000292648	OTTHUMP00000078001	0	0	0	0	0	0	0	1	0	0	0	0	0	0	0	0
IPI00033130	Q9UBE0		ENSP00000270225	NP_005491	HIT000064009	OTTHUMP00000078003	0	0	0	0	0	1	0	1	0	1	0	0	0	0	0	0
IPI00017341	Q15428		ENSP00000221494	NP_009096	HIT000034656	OTTHUMP00000078023	0	0	0	0	1	0	0	0	0	0	0	0	0	0	0	0
IPI00013949	O43765	Q6FIA9	ENSP00000221566	NP_003012	HIT000024034	OTTHUMP00000078036	2	0	2	1	5	4	5	1	4	3	2	3	0	0	1	0
IPI00019169	Q99961	Q6FGM0	ENSP00000269886	NP_003016	HIT000030276	OTTHUMP00000078039	1	0	4	0	1	0	5	8	8	5	10	6	0	2	1	2
IPI00025331		Q6PCD0	ENSP00000221485	NP_064705	HIT000059055	OTTHUMP00000078074	8	8	8	4	10	16	12	4	8	7	8	8	2	0	2	2
IPI00164782	Q9NS82		ENSP00000253188	NP_062823	HIT000059192	OTTHUMP00000078084	0	0	0	0	0	0	0	0	0	0	0	0	1	0	0	0
IPI00010343	Q9UPR5		ENSP00000236877	NP_055878	HIT000000804	OTTHUMP00000078086	12	2	12	3	32	18	12	6	14	18	17	15	3	5	3	3
IPI00012382	P09012		ENSP00000243563	NP_004587	HIT000029593	OTTHUMP00000078094	0	0	0	0	2	2	2	2	0	0	1	0	0	0	0	0
IPI00303343		Q7Z5V7	ENSP00000353769	NP_067051	HIT000007718	OTTHUMP00000078112	0	0	0	0	0	0	0	0	1	1	0	0	0	0	0	0
IPI00479592		Q6P143	ENSP00000326767	NP_112235	HIT000255210	OTTHUMP00000078141	0	0	0	0	0	0	0	0	0	0	0	1	0	0	0	0
IPI00549189	P52888	Q96CV8	ENSP00000304467	NP_003240	HIT000030855	OTTHUMP00000078155	0	0	0	0	1	0	0	0	0	0	0	1	0	0	0	0
IPI00001589	Q9Y5L4		ENSP00000215570	NP_036590	HIT000289377	OTTHUMP00000078157	2	1	3	0	5	6	4	2	0	0	3	1	0	0	1	0
IPI00306516	O43615	Q53G69	ENSP00000270538	NP_006342	HIT000041873	OTTHUMP00000078158	1	0	1	1	0	0	1	0	0	0	0	0	0	0	0	0
IPI00303882	O60664		ENSP00000221957	NP_005808	HIT000038601	OTTHUMP00000078160	0	0	0	0	0	0	0	1	0	0	0	0	13	10	7	6
IPI00152427		Q59F60	ENSP00000352836	NP_612203		OTTHUMP00000078161		0	0	0	0	0	0	0	0	0	0	0	0	0	0	0	1
IPI00044707	Q86UW8		ENSP00000291481	NP_075378	HIT000001641	OTTHUMP00000078167	6	3	0	0	0	0	0	0	3	0	2	2	0	0	0	0
IPI00013301	P41273	Q2M3S2	ENSP00000245817	NP_003802	HIT000217497	OTTHUMP00000078173	0	1	0	0	0	0	0	0	0	0	0	0	0	0	0	0
IPI00014053	O96008		ENSP00000252487	NP_006105	HIT000063723	OTTHUMP00000078179	3	2	4	0	3	4	3	1	3	2	0	1	0	0	0	0
IPI00010779	P67936	Q5U0D9	ENSP00000300933	NP_003281		OTTHUMP00000078182		11	6	10	8	17	18	10	12	9	18	18	15	11	14	13	200
IPI00419856		Q6IN77		NP_038461	HIT000264865	OTTHUMP00000078196	2	0	1	0	3	2	1	0	6	2	1	2	0	0	0	0
IPI00176427		Q6NUR8	ENSP00000222374	NP_660339	HIT000078405	OTTHUMP00000078202	2	0	0	0	4	2	3	3	4	2	7	4	4	4	6	5
IPI00023598	P04350		ENSP00000264071	NP_006078	HIT000020057	OTTHUMP00000078206	153	126	89	58	153	165	190	193	91	106	115	121	137	140	186	170
IPI00023234	Q9UBT2	Q59H87	ENSP00000246548	NP_005490	HIT000031471	OTTHUMP00000078217	0	0	0	0	1	0	0	0	0	0	0	1	0	0	0	0
IPI00024757	O14957		ENSP00000262946	NP_006821	HIT000031626	OTTHUMP00000078229	3	2	3	1	3	3	1	1	0	0	0	1	0	0	0	0
IPI00026964	P47985		ENSP00000306397	NP_005994	HIT000034755	OTTHUMP00000078230	14	3	9	2	6	9	1	3	17	16	23	16	3	2	2	7
IPI00641774						OTTHUMP00000078295	0	0	0	0	0	0	0	1	0	0	0	0	0	0	0	0
IPI00012209	Q9BUY5	Q59EH4	ENSP00000253115	NP_077011	HIT000030654	OTTHUMP00000078359	0	0	1	0	0	0	0	0	0	0	0	0	0	0	0	0
IPI00472817	Q8IYI8		ENSP00000305373	XP_001131146	HIT000020107	OTTHUMP00000078371	0	0	0	0	0	0	0	0	0	0	0	1	0	0	0	0
IPI00033143	Q9UBQ5		ENSP00000248342	NP_037366	HIT000001833	OTTHUMP00000078390	1	0	0	0	0	0	0	0	2	2	1	1	0	0	0	1
IPI00009532	P80404		ENSP00000268251	NP_000654	HIT000272519	OTTHUMP00000080085	54	35	28	21	39	38	24	32	34	43	44	57	21	26	29	19
IPI00030099	O60503		ENSP00000294016	NP_001107	HIT000000237	OTTHUMP00000080116	0	0	0	0	0	0	0	0	0	1	0	0	0	0	0	0
IPI00465439	P04075	Q6FI10	ENSP00000336927	NP_000025	HIT000031868	OTTHUMP00000080131	165	141	138	62	155	148	161	161	165	132	215	181	63	74	81	68
IPI00034159	P61421		ENSP00000290949	NP_004682	HIT000034029	OTTHUMP00000080169	39	26	33	24	43	44	41	40	25	32	33	44	20	24	23	19
IPI00029074	O60359		ENSP00000005284	NP_006530	HIT000095017	OTTHUMP00000080232	0	0	1	0	3	3	1	0	1	0	0	0	0	0	0	0
IPI00027264	P22676		ENSP00000307508	NP_001731	HIT000322039	OTTHUMP00000080233	0	0	4	0	2	0	2	0	1	2	1	1	0	0	0	0
IPI00304409	Q9Y2V2	Q2YDX5	ENSP00000311847	NP_001035941	HIT000031520	OTTHUMP00000080238	2	0	0	2	1	0	0	0	2	0	0	0	0	0	0	0
IPI00385480	Q8WXD9		ENSP00000345436	NP_065815		OTTHUMP00000080240		8	1	5	1	7	7	4	3	3	6	1	2	3	3	0	54
IPI00006547	Q8TB96		ENSP00000319918	NP_110417	HIT000039743	OTTHUMP00000080261	0	0	0	0	0	0	0	0	4	0	2	1	0	0	0	0
IPI00024046	P55290	Q6GTW4	ENSP00000268613	NP_001248	HIT000220577	OTTHUMP00000080266	5	1	3	0	9	6	8	6	10	8	8	13	2	2	2	1
IPI00306413	Q9BW30		ENSP00000290942	NP_057048	HIT000272738	OTTHUMP00000080300	3	0	1	0	1	3	5	4	8	2	9	3	15	8	16	10
IPI00010133	P31146	Q2YD73	ENSP00000219150	NP_009005	HIT000080810	OTTHUMP00000080374	19	8	11	7	19	16	20	16	5	20	16	18	1	4	8	3
IPI00017704	Q14019		ENSP00000262428	NP_066972	HIT000297977	OTTHUMP00000080376	3	0	3	2	5	5	1	0	2	4	5	5	5	2	5	2
IPI00006579	P13073	Q6P666	ENSP00000253452	NP_001852	HIT000222217	OTTHUMP00000080377	5	7	7	10	20	6	10	13	10	7	10	15	4	10	8	9
IPI00645310	Q96FN4	Q719H8	ENSP00000290776	NP_689940	HIT000053962	OTTHUMP00000080382	0	0	0	0	0	1	0	0	0	0	0	0	0	0	0	0
IPI00646917	O43809	Q0JTR5	ENSP00000300291	NP_008937	HIT000283078	OTTHUMP00000080385	0	0	0	0	0	4	0	2	1	0	0	1	0	2	0	1
IPI00000949	Q14894	Q5HYB7	ENSP00000219599	NP_001879	HIT000057124	OTTHUMP00000080390	12	7	17	16	20	21	17	24	45	50	55	43	32	32	25	35
IPI00020602	P19784		ENSP00000262506	NP_001887	HIT000195775	OTTHUMP00000080391	1	1	3	2	2	1	3	1	0	0	0	1	0	0	2	0
IPI00024619	Q9NRP2		ENSP00000219400	NP_064573	HIT000041641	OTTHUMP00000080404	0	0	0	0	0	0	1	1	0	0	0	0	0	0	0	0
IPI00020050	Q9NUL7		ENSP00000332340	NP_060850	HIT000004618	OTTHUMP00000080411	0	0	0	1	0	0	1	0	0	0	0	0	0	0	0	0
IPI00294211	Q92620		ENSP00000268482	NP_054722	HIT000033730	OTTHUMP00000080419	0	0	1	0	0	0	0	0	0	0	0	0	0	0	0	0
IPI00465071		Q4KMP7	ENSP00000303624	NP_056342	HIT000260759	OTTHUMP00000080428	0	0	0	1	0	0	0	0	3	0	2	3	1	3	0	0
IPI00303290		Q96B77	ENSP00000331640	NP_056236	HIT000024209	OTTHUMP00000080431	0	0	0	0	0	0	0	0	1	0	0	0	0	0	0	0
IPI00032406	O60884		ENSP00000314030	NP_005871	HIT000037340	OTTHUMP00000080457	9	1	10	1	8	4	4	5	4	4	8	6	3	1	3	0
IPI00011592	O43237		ENSP00000258198	NP_006132	HIT000063309	OTTHUMP00000080465	5	1	0	2	1	5	13	11	16	9	15	12	7	10	6	3
IPI00641920		O75547	ENSP00000307449	NP_061938	HIT000251504	OTTHUMP00000080485	0	0	0	0	0	0	1	3	1	0	1	0	0	0	0	0
IPI00161196	Q96CD0		ENSP00000258200	NP_060848	HIT000277204	OTTHUMP00000080504	0	0	0	0	0	0	0	0	0	0	0	1	0	0	0	0
IPI00025160		Q6IA12	ENSP00000261776	NP_060522	HIT000013047	OTTHUMP00000080509	1	1	0	1	2	1	1	0	0	0	3	0	0	0	1	0
IPI00305010		Q9BRF8	ENSP00000261660	NP_060810	HIT000018720	OTTHUMP00000080518	0	0	0	0	0	0	0	0	2	0	0	2	4	5	2	2
IPI00027996	P57737	Q17RK4	ENSP00000251166	NP_078811	HIT000008948	OTTHUMP00000080586	1	0	1	0	0	2	0	0	0	0	0	0	0	0	2	0
IPI00028277		Q9C0B1	ENSP00000268349	XP_051200	HIT000021409	OTTHUMP00000080653	0	0	1	0	0	0	0	1	0	1	1	3	0	0	0	0
IPI00026358	P60520	Q6FG91	ENSP00000037243	NP_009216	HIT000059006	OTTHUMP00000080663	0	0	2	2	6	6	1	3	8	7	9	6	2	4	2	1
IPI00646669						OTTHUMP00000080666	0	0	1	0	0	0	0	0	0	0	0	0	0	1	0	0
IPI00022758	Q9H2C0		ENSP00000248272	NP_071324	HIT000076472	OTTHUMP00000080667	0	0	0	0	0	2	3	3	0	0	0	1	2	4	3	2
IPI00220281	P09471	Q8N6I9	ENSP00000262493	NP_066268	HIT000080742	OTTHUMP00000080687	34	18	36	29	63	62	31	16	28	38	39	37	4	7	9	5
IPI00018206	P00505	Q53FL3	ENSP00000245206	NP_002071	HIT000194855	OTTHUMP00000080691	77	55	48	30	46	52	48	54	64	77	97	106	26	29	28	25
IPI00008239	Q9NZH0		ENSP00000300571	NP_057319	HIT000072829	OTTHUMP00000080705	0	0	0	0	0	0	0	1	0	0	0	0	5	6	4	4
IPI00029768	Q12879	Q17RZ6	ENSP00000332549	NP_000824	HIT000222163	OTTHUMP00000080708	0	0	0	0	0	0	0	1	0	0	0	0	0	0	0	0
IPI00218829	P15170	Q7KZX8	ENSP00000219627	NP_002085	HIT000321624	OTTHUMP00000080709	2	3	4	2	2	1	1	2	1	1	0	0	2	2	1	3
IPI00641155						OTTHUMP00000080730	0	0	0	0	0	0	0	0	0	0	0	0	0	1	0	0
IPI00026824	P30519	Q53HF1	ENSP00000219700	NP_002125	HIT000293959	OTTHUMP00000080731	3	1	2	1	4	2	0	0	3	6	2	0	2	0	4	2
IPI00026052	O75506	Q53XA8	ENSP00000299671	NP_001528	HIT000296226	OTTHUMP00000080737	12	8	14	7	20	21	10	18	12	16	17	14	4	5	5	5
IPI00296510		Q8N3P6	ENSP00000317701			OTTHUMP00000080764	1	0	0	0	0	0	0	0	0	0	0	0	0	0	0	0
IPI00402189			ENSP00000334201		HIT000045971	OTTHUMP00000080781	0	0	1	0	0	0	0	0	0	0	0	0	0	0	0	0
IPI00030578	Q9HCJ6	Q8NDE0	ENSP00000303129	NP_065978	HIT000051137	OTTHUMP00000080790	3	2	4	0	4	9	7	9	10	8	11	6	4	2	0	2
IPI00373862			ENSP00000332967	XP_370997		OTTHUMP00000080803		0	0	0	0	0	0	0	0	1	0	0	0	0	0	0	1
IPI00166206		Q8N1N6	ENSP00000348520			OTTHUMP00000080815	0	0	0	0	0	0	0	0	0	1	0	0	0	0	0	0
IPI00443425		Q6ZQQ9	ENSP00000369490		HIT000093088	OTTHUMP00000080835	0	0	0	0	0	1	0	0	0	0	0	0	0	0	0	0
IPI00644660						OTTHUMP00000080861	0	0	2	0	0	0	0	0	0	0	0	0	0	0	0	0
IPI00028516	O60268		ENSP00000258180	NP_055547	HIT000000230	OTTHUMP00000080876	0	0	1	0	5	3	7	5	1	0	1	1	1	0	0	0
IPI00297333		Q2KJ08	ENSP00000293970	NP_065756	HIT000000887	OTTHUMP00000080894	1	0	1	0	0	1	2	2	2	6	2	5	0	2	1	1
IPI00000769	Q14807	O60846	ENSP00000160827	NP_015556	HIT000058516	OTTHUMP00000080912	0	0	0	0	2	0	1	0	2	0	0	1	2	0	1	0
IPI00218716	O43561		ENSP00000318228	NP_001014987	HIT000035292	OTTHUMP00000080924	0	0	0	0	0	0	1	0	0	0	0	0	0	0	0	0
IPI00431403		Q6UTX4	ENSP00000370610			OTTHUMP00000080966	0	0	0	0	0	0	1	0	0	0	0	0	0	0	0	0
IPI00646007		Q8IVQ5	ENSP00000305465	NP_777584	HIT000022330	OTTHUMP00000080987	1	0	0	0	0	0	0	0	0	0	0	0	0	0	0	0
IPI00305626		Q5U4P2	ENSP00000311447	NP_859069	HIT000065809	OTTHUMP00000080988	1	0	2	4	0	0	1	3	2	2	2	4	1	0	1	0
IPI00177008			ENSP00000330918	NP_001035830	HIT000286384	OTTHUMP00000080995	0	0	0	0	0	0	2	0	0	2	0	0	0	0	0	0
IPI00639826						OTTHUMP00000081052	0	0	0	0	0	0	0	0	0	0	0	0	0	0	0	1
IPI00640047		Q7L3S4	ENSP00000323945	NP_057727	HIT000040140	OTTHUMP00000081059	0	0	0	0	0	0	0	0	0	0	0	0	1	0	0	0
IPI00171459		Q3SXM4	ENSP00000219439	NP_113651	HIT000081913	OTTHUMP00000081077	6	2	1	1	2	1	0	0	0	0	0	0	0	0	0	0
IPI00013779	Q9BSU1		ENSP00000219139	NP_079463	HIT000072645	OTTHUMP00000081099	2	2	1	1	1	0	1	1	2	0	0	2	0	0	0	0
IPI00007367	O15553	Q3MJ84	ENSP00000219596	NP_000234	HIT000062452	OTTHUMP00000081112	0	0	0	0	0	0	1	0	0	0	0	0	0	0	0	0
IPI00641583						OTTHUMP00000081127	0	0	0	0	0	0	0	0	0	0	0	0	0	1	0	0
IPI00555642		Q96FR9	ENSP00000300005	NP_542394		OTTHUMP00000081131		0	0	0	0	0	0	0	0	0	0	0	0	1	0	0	1
IPI00032498	Q9BTE1		ENSP00000300087	NP_115875	HIT000031769	OTTHUMP00000081169	0	0	0	0	0	0	0	0	0	0	1	0	0	0	0	0
IPI00181733	Q8N461		ENSP00000318674	NP_699181	HIT000051769	OTTHUMP00000081171	3	4	3	2	5	2	1	4	2	0	2	0	0	1	0	1
IPI00014758	Q9NPA2		ENSP00000337816	NP_071913	HIT000245273	OTTHUMP00000081204	0	0	0	1	0	0	0	0	0	0	0	0	0	0	0	0
IPI00335643	Q9ULH7		ENSP00000339138			OTTHUMP00000081219	0	0	0	0	0	0	0	0	0	0	0	0	0	0	0	1
IPI00016666	P25713		ENSP00000200691	NP_005945	HIT000100496	OTTHUMP00000081245	32	14	16	5	7	10	14	11	29	32	38	30	13	18	18	14
IPI00000105	Q14764		ENSP00000349977	NP_005106	HIT000323780	OTTHUMP00000081249	0	0	0	0	0	1	0	0	2	3	6	2	6	5	18	18
IPI00218463	Q9Y3D7		ENSP00000315693	NP_057153		OTTHUMP00000081257		0	0	0	0	1	1	0	0	0	1	3	0	0	0	0	6
IPI00005667	O75113	Q2YDX1	ENSP00000262384	NP_694574	HIT000000340	OTTHUMP00000081262	0	0	0	0	0	0	1	0	0	0	0	0	0	0	0	0
IPI00022442	O14561		ENSP00000007516	NP_004994	HIT000067486	OTTHUMP00000081277	10	6	8	7	15	11	13	12	8	13	12	14	2	3	7	2
IPI00479905	O96000		ENSP00000268668	NP_004539	HIT000068144	OTTHUMP00000081280	0	1	1	3	1	1	0	2	2	4	5	3	2	1	2	0
IPI00012315	Q13232	Q9NUF9	ENSP00000219302	NP_002504	HIT000029460	OTTHUMP00000081298	0	1	3	1	0	0	1	0	0	3	2	1	0	0	0	0
IPI00385743		Q5EY36	ENSP00000301749	NP_849172	HIT000015298	OTTHUMP00000081311	0	0	0	0	0	0	0	1	0	0	0	0	0	0	0	0
IPI00216346	O60936	Q5TZN6		NP_003937	HIT000035955	OTTHUMP00000081312	5	2	3	2	4	3	2	0	5	3	1	1	1	2	2	0
IPI00009901	P61970		ENSP00000219169	NP_005787	HIT000300729	OTTHUMP00000081333	2	2	2	0	3	3	2	4	4	5	5	3	1	1	1	2
IPI00030064	O95371	Q6IF34	ENSP00000307726	NP_036500	HIT000263607	OTTHUMP00000081339	0	0	0	0	0	0	0	1	0	0	0	0	0	0	0	0
IPI00007060	Q9HBH1		ENSP00000288022	NP_071736		OTTHUMP00000081353		0	0	0	0	0	0	1	0	0	0	0	0	0	0	0	1
IPI00018288	P19387	Q6FGR6	ENSP00000219252	NP_116558	HIT000031476	OTTHUMP00000081385	0	0	0	0	0	0	0	0	0	0	0	0	0	0	0	1
IPI00219628	P05771		ENSP00000305355	NP_002729		OTTHUMP00000081395		6	3	1	1	12	13	7	4	5	9	9	5	2	8	3	93
IPI00019927	P51665		ENSP00000219313	NP_002802	HIT000296015	OTTHUMP00000081414	4	4	3	7	5	3	3	3	3	2	0	2	2	1	1	0
IPI00221091	P62244		ENSP00000318646	NP_001010	HIT000050238	OTTHUMP00000081453	1	0	0	0	1	3	0	1	0	0	3	0	0	0	0	0
IPI00300371	Q15393	Q6NTI8	ENSP00000305790	NP_036558	HIT000243874	OTTHUMP00000081478	1	0	2	0	0	0	0	0	0	2	3	0	0	0	0	0
IPI00385535		Q9NRF1	ENSP00000321221			OTTHUMP00000081481	0	0	0	0	0	0	0	0	0	0	0	0	0	0	1	0
IPI00008986	Q01650	Q2MCL6	ENSP00000261622	NP_003477	HIT000069405	OTTHUMP00000081496	1	0	1	0	0	0	0	0	2	0	0	2	0	1	1	0
IPI00782992	Q9UQ35	O60382	ENSP00000301740	NP_057417		OTTHUMP00000081538		0	2	0	0	2	0	0	0	0	0	0	0	0	0	0	4
IPI00018079	P35346	Q541E0	ENSP00000293897	NP_001044		OTTHUMP00000081541		0	0	0	0	0	0	0	0	0	0	0	1	0	0	0	1
IPI00029730	Q12846	Q6FHE8	ENSP00000317714	NP_004595	HIT000305684	OTTHUMP00000081545	0	0	2	0	0	3	0	0	0	0	0	0	0	0	1	1
IPI00013947	O43761		ENSP00000248121	NP_004200	HIT000287692	OTTHUMP00000081559	5	6	3	7	10	13	7	7	2	8	7	4	6	2	2	3
IPI00006283	Q9UL54		ENSP00000279394	NP_004774	HIT000000598	OTTHUMP00000081566	0	0	0	0	0	0	0	0	0	0	0	1	0	0	0	0
IPI00008961	Q9NYB0	Q4W4Y2	ENSP00000300086	NP_061848	HIT000039532	OTTHUMP00000081581	0	0	1	0	0	0	0	0	0	0	0	0	0	0	0	0
IPI00032485	Q9Y342		ENSP00000219207	NP_057077	HIT000049855	OTTHUMP00000081590	0	0	0	0	0	2	3	4	0	0	2	7	1	3	2	3
IPI00030275	Q12931	Q53FS6	ENSP00000246957	NP_057376	HIT000050838	OTTHUMP00000081621	4	1	1	0	0	0	2	2	5	1	7	0	0	0	0	0
IPI00013683	Q13509	Q3ZCR3	ENSP00000320295	NP_006077	HIT000277220	OTTHUMP00000081633	56	24	38	9	72	73	73	68	26	32	24	27	31	37	32	18
IPI00027107	P49411		ENSP00000322439	NP_003312	HIT000034759	OTTHUMP00000081636	15	13	19	5	22	20	15	19	22	27	24	22	10	5	14	7
IPI00305383	P22695		ENSP00000268379	NP_003357	HIT000018863	OTTHUMP00000081652	69	63	54	45	56	54	43	42	47	43	38	52	42	37	45	51
IPI00291946	Q14694		ENSP00000219473	NP_005144	HIT000042327	OTTHUMP00000081653	0	0	0	0	0	1	0	0	0	0	0	0	0	0	0	0
IPI00297289	Q70CQ4		ENSP00000219689	NP_065769	HIT000249166	OTTHUMP00000081654	0	0	0	0	0	0	0	0	1	0	1	0	0	0	0	0
IPI00018931	Q96QK1	Q0JS99	ENSP00000299138	NP_060676	HIT000072918	OTTHUMP00000081661	12	11	9	7	15	12	13	15	22	26	29	23	5	5	6	1
IPI00100660		Q2M1K9	ENSP00000262383	NP_055884	HIT000000485	OTTHUMP00000081713	0	0	0	0	0	0	0	0	0	0	0	0	0	0	1	0
IPI00644680				XP_001125745		OTTHUMP00000081718		0	0	0	0	0	0	0	0	0	0	0	0	0	0	0	1
IPI00647237						OTTHUMP00000081728	0	0	0	0	0	0	0	0	0	1	0	0	0	0	0	0
IPI00020513	Q15942	Q28617	ENSP00000324422	NP_001010972	HIT000033938	OTTHUMP00000081863	4	6	3	6	2	0	2	5	6	7	6	2	3	8	3	2
IPI00010148	P48539	Q6ICS4	ENSP00000329403	NP_006189	HIT000220289	OTTHUMP00000109191	5	0	1	0	0	1	0	0	3	2	0	2	2	4	0	0
IPI00218848	P56385		ENSP00000306003	NP_009031	HIT000101556	OTTHUMP00000109533	2	0	0	0	1	1	3	3	1	2	1	0	0	0	0	1
IPI00219861	P24666	Q3KQX8	ENSP00000272065	NP_004291	HIT000196541	OTTHUMP00000109538	0	0	2	0	2	0	0	2	2	4	3	0	2	0	2	0
IPI00169381	Q8NHY5		ENSP00000344216	NP_683762	HIT000081012	OTTHUMP00000114799	0	0	0	0	0	0	0	0	0	0	0	0	0	0	1	0
IPI00305166	P31040	Q0QF12	ENSP00000264932	NP_004159	HIT000030364	OTTHUMP00000115308	22	21	25	19	22	32	25	20	28	25	18	20	8	6	9	8
IPI00025277	O75340	Q2YDC2	ENSP00000264933	NP_037364	HIT000035794	OTTHUMP00000115318	0	1	0	0	1	1	0	1	1	1	3	1	1	2	1	0
IPI00026848	P30533	Q2M310	ENSP00000296325	NP_002328	HIT000056631	OTTHUMP00000115346	2	0	2	0	0	0	1	1	1	2	2	2	0	0	0	0
IPI00013415	P62081	Q57Z92	ENSP00000339095	NP_001002	HIT000260253	OTTHUMP00000115354	3	3	3	0	3	3	1	2	2	6	4	8	2	0	2	0
IPI00011184	P48764	O00617	ENSP00000264938	NP_004165	HIT000218904	OTTHUMP00000115364	0	0	1	0	0	0	0	0	0	0	0	0	0	0	0	0
IPI00027194	Q9P2W9		ENSP00000305810	NP_058626	HIT000288686	OTTHUMP00000115383	0	0	0	0	0	0	0	0	1	0	0	0	0	0	0	0
IPI00025344	O75380	Q6IBC4	ENSP00000274137	NP_004544	HIT000005777	OTTHUMP00000115430	16	15	13	12	8	10	9	8	14	7	7	6	9	10	6	7
IPI00219344	P37235	O75544	ENSP00000310749	NP_002140	HIT000279011	OTTHUMP00000115513	5	0	2	0	5	6	6	2	4	4	2	0	0	0	0	0
IPI00029557	Q9HAV7		ENSP00000264954	NP_079472	HIT000039788	OTTHUMP00000115578	2	0	2	0	0	3	0	0	1	1	0	0	0	0	0	0
IPI00301317	Q9UQB3		ENSP00000307134	NP_001323	HIT000222809	OTTHUMP00000115594	9	2	14	2	13	11	4	4	9	5	11	6	5	3	2	4
IPI00006592	Q9UJ68	Q52TC4	ENSP00000313921	NP_036463	HIT000054055	OTTHUMP00000115600	0	0	0	0	0	0	0	0	0	0	1	0	0	0	0	0
IPI00152653	Q8TE73	O95496	ENSP00000265104	NP_001360	HIT000083790	OTTHUMP00000115635	0	0	0	0	0	1	0	0	0	0	0	0	0	0	0	0
IPI00020127	P27694		ENSP00000254719	NP_002936	HIT000038283	OTTHUMP00000115691	0	0	0	0	1	1	1	0	0	2	0	0	0	0	0	0
IPI00030328	Q9GZT4	Q3ZK31	ENSP00000339435	NP_068766	HIT000006443	OTTHUMP00000115699	0	0	0	0	0	0	0	0	1	0	1	0	0	0	0	0
IPI00293655	Q92499		ENSP00000233084	NP_004930	HIT000323104	OTTHUMP00000115711	10	7	9	5	12	14	6	6	9	11	15	12	3	2	5	9
IPI00006574	Q9H0Q0	Q53QW2	ENSP00000347744	NP_110424	HIT000052099	OTTHUMP00000115751	3	1	1	0	9	9	8	7	6	5	6	1	2	7	2	5
IPI00216313	P62760	Q4ZFX3	ENSP00000295156	NP_003376	HIT000300338	OTTHUMP00000115804	177	178	165	127	175	188	166	189	136	168	161	153	90	71	81	69
IPI00102580	Q96QG7	Q53EW4	ENSP00000221086	NP_056273	HIT000246758	OTTHUMP00000115806	0	0	0	0	1	0	0	0	0	0	0	0	0	0	0	0
IPI00021301	P45381	Q6FH48	ENSP00000263080	NP_000040	HIT000216183	OTTHUMP00000115814	0	0	1	0	0	0	0	0	0	0	3	0	5	4	6	6
IPI00386211		Q9H6G0	ENSP00000040738	NP_683692	HIT000001042	OTTHUMP00000115820	1	0	0	0	0	1	0	0	0	0	0	0	0	0	0	0
IPI00295399	Q9Y6N8		ENSP00000264463	NP_006718		OTTHUMP00000115830		0	0	0	0	0	0	0	0	0	0	1	0	0	0	0	1
IPI00297180	Q9ULB4	Q32LY1	ENSP00000231021	NP_057363	HIT000059128	OTTHUMP00000115836	0	0	0	0	0	0	0	0	0	1	0	0	0	0	0	0
IPI00329633	P26639	Q53GX7	ENSP00000265112	NP_689508	HIT000029699	OTTHUMP00000115851	2	0	0	0	0	3	1	3	0	1	0	1	0	0	0	0
IPI00005585	O14907		ENSP00000225525	NP_055419	HIT000062942	OTTHUMP00000115871	0	0	0	0	0	0	0	0	1	0	0	0	0	0	1	0
IPI00177940	Q9HBH5	Q53RX3	ENSP00000237831	NP_065956		OTTHUMP00000115875		0	0	0	0	0	3	0	0	0	1	0	1	0	0	1	6
IPI00005918	Q9UHK6	Q3KT79	ENSP00000334424	NP_055139	HIT000072009	OTTHUMP00000115916	0	0	0	0	0	0	0	0	1	0	2	1	0	0	0	0
IPI00000041	P62745		ENSP00000272233	NP_004031	HIT000044271	OTTHUMP00000115947	8	10	7	7	11	13	8	9	6	2	3	2	6	6	14	7
IPI00000811	P28072	Q6IAT9	ENSP00000270586	NP_002789	HIT000284778	OTTHUMP00000115982	1	0	0	0	2	2	0	1	1	0	2	0	0	0	0	1
IPI00029753	Q04844	Q8N731	ENSP00000293780	NP_000071	HIT000322830	OTTHUMP00000115983	0	0	0	0	0	0	0	0	0	0	1	0	0	0	0	0
IPI00022229	P04114	P78482	ENSP00000233242	NP_000375	HIT000321047	OTTHUMP00000115994	0	0	1	1	1	0	0	0	0	0	0	0	0	0	0	0
IPI00436632	Q6KC79	Q6IEH8	ENSP00000282516	NP_597677	HIT000249290	OTTHUMP00000116005	0	0	0	0	0	0	1	0	0	0	0	0	0	0	0	1
IPI00295741	P07858	Q503A6	ENSP00000342070	NP_001899	HIT000294012	OTTHUMP00000116009	2	2	1	0	5	3	5	4	2	2	3	3	0	0	0	1
IPI00028513	O60266	Q53T54	ENSP00000260600	NP_004027	HIT000063133	OTTHUMP00000119992	0	0	0	0	0	0	0	0	0	0	1	0	0	0	1	0
IPI00329216	Q9Y6K1	Q59HC6	ENSP00000264709	NP_072046	HIT000077684	OTTHUMP00000120005	0	0	0	0	1	0	0	0	0	0	0	0	0	0	0	0
IPI00026516	P55809	Q6IAV5	ENSP00000196371	NP_000427	HIT000220746	OTTHUMP00000120012	47	34	28	24	34	42	18	22	74	105	98	95	10	15	14	11
IPI00016513	P61026	Q53SX4	ENSP00000264710	NP_057215	HIT000006497	OTTHUMP00000120025	12	6	10	6	14	12	16	14	8	5	7	9	10	6	10	12
IPI00337541	Q13423	Q0JSM3	ENSP00000264663	NP_036475	HIT000026734	OTTHUMP00000122432	32	25	34	19	44	40	23	24	39	38	37	35	10	17	11	14
IPI00329209	Q86XE3		ENSP00000321455	NP_859074	HIT000052936	OTTHUMP00000122437	0	0	0	0	0	1	0	0	0	0	0	0	0	0	0	0
IPI00010278	Q9NP92	Q53GN7	ENSP00000230914	NP_057724	HIT000071325	OTTHUMP00000122439	0	0	0	0	0	0	0	0	0	0	1	0	0	0	0	0
IPI00022793	P55084	Q53TA6	ENSP00000325136	NP_000174	HIT000262383	OTTHUMP00000122456	7	5	4	0	7	5	4	3	7	2	6	6	1	2	6	1
IPI00031522	P40939	Q53T69	ENSP00000288682	NP_000173	HIT000034217	OTTHUMP00000122457	20	9	10	8	13	18	7	7	28	24	42	41	11	15	17	12
IPI00011217	O43181		ENSP00000296684	NP_002486	HIT000062512	OTTHUMP00000122466	0	2	0	0	4	2	3	1	1	3	3	2	5	0	2	3
IPI00013698	Q13510	Q53H01	ENSP00000262097	NP_808592		OTTHUMP00000122481		3	3	2	3	1	4	2	3	1	3	5	1	6	7	14	71
IPI00647217	P42285	Q2M386	ENSP00000230640	NP_056175	HIT000261821	OTTHUMP00000122510	0	0	0	0	0	1	0	0	0	0	0	0	0	0	0	0
IPI00061114	Q96E17		ENSP00000282878	NP_612462	HIT000036091	OTTHUMP00000122555	7	3	11	1	10	8	4	7	10	8	4	5	0	1	2	0
IPI00017597	Q9UPY8	Q6FHB0	ENSP00000233121	NP_036458	HIT000058812	OTTHUMP00000122582	5	1	4	5	5	7	8	6	2	2	3	4	2	2	1	2
IPI00013079	Q9Y6C2	Q53SY9	ENSP00000260650	NP_008977	HIT000068141	OTTHUMP00000122584	0	0	0	0	0	0	0	0	0	0	0	1	0	0	0	0
IPI00335509	Q9BPU6	Q53SW3	ENSP00000288699	NP_064519	HIT000075513	OTTHUMP00000122586	13	5	9	5	18	17	14	20	11	11	15	13	9	11	15	6
IPI00023958	P39210	Q9UPC7	ENSP00000233545	NP_002428	HIT000323586	OTTHUMP00000122591	3	0	0	0	0	1	0	0	2	5	4	2	0	0	0	0
IPI00033349	Q9HCU5	Q53SZ8	ENSP00000260643	NP_037520	HIT000052484	OTTHUMP00000122594	0	0	0	0	0	0	0	0	0	1	0	0	0	0	0	0
IPI00175217	Q8N7S2	Q53SY5	ENSP00000296097	NP_775921	HIT000022590	OTTHUMP00000122599	0	0	0	1	0	0	0	0	0	0	0	0	0	0	0	0
IPI00289862	Q12765	Q25QX7	ENSP00000242059	NP_055581	HIT000042329	OTTHUMP00000122627	22	18	24	8	15	22	15	20	40	44	31	39	15	15	15	13
IPI00166085	Q8N0V4	Q3MIN2	ENSP00000282970	NP_060646	HIT000248157	OTTHUMP00000123374	0	0	0	0	0	0	0	0	0	0	1	0	0	0	0	0
IPI00010368	O00139	Q7Z5I3	ENSP00000230731	NP_004511	HIT000325436	OTTHUMP00000123384	2	0	2	0	4	3	2	1	3	4	4	1	1	0	1	2
IPI00014219	Q15036		ENSP00000233575	NP_055563	HIT000042212	OTTHUMP00000123418	0	0	0	0	0	0	0	0	1	0	0	0	0	0	0	0
IPI00006167	O15355	Q6IAU5	ENSP00000264714	NP_002698	HIT000288827	OTTHUMP00000123426	0	0	1	0	0	0	0	0	0	0	0	0	0	0	0	0
IPI00604756	Q9UHY1		ENSP00000233557	NP_037524	HIT000042537	OTTHUMP00000123427	0	0	0	0	0	0	1	0	2	1	1	0	0	0	0	0
IPI00061623	Q96EQ0	O75589	ENSP00000351496	NP_061945	HIT000021176	OTTHUMP00000123451	2	0	1	2	0	1	1	3	1	2	2	4	1	3	2	0
IPI00010346	Q9BYT8	Q8NDD9	ENSP00000339283	NP_065777	HIT000000942	OTTHUMP00000123454	0	0	0	1	1	1	2	1	0	0	1	0	0	0	0	0
IPI00018352	P09936	Q4W5K6	ENSP00000284440	NP_004172	HIT000029526	OTTHUMP00000125219	57	43	45	30	54	52	60	61	30	32	27	46	46	52	55	53
IPI00299084	P57088		ENSP00000264452	NP_060596	HIT000019045	OTTHUMP00000125225	0	0	0	0	0	0	0	0	0	1	0	0	0	0	0	0
IPI00552548		Q4W5B6	ENSP00000264451	NP_006336	HIT000251709	OTTHUMP00000125233	0	0	0	0	0	0	0	0	1	2	1	1	0	0	0	0
IPI00219729	Q02978	Q6IBH0	ENSP00000225665	NP_003553	HIT000288798	OTTHUMP00000125243	14	5	11	8	12	10	6	8	13	17	17	10	5	6	5	6
IPI00216691	P07737	Q53Y44	ENSP00000225655	NP_005013	HIT000272364	OTTHUMP00000125244	10	3	9	3	17	12	18	17	12	14	20	13	13	15	9	8
IPI00299122	P18505		ENSP00000295454	NP_000803	HIT000321460	OTTHUMP00000125281	0	0	0	0	1	0	0	0	0	0	0	1	0	0	0	0
IPI00257508	Q16555	Q53ET2	ENSP00000309539	NP_001377	HIT000262444	OTTHUMP00000125291	565	496	545	418	683	660	614	648	403	507	643	617	446	475	546	497
IPI00022002	Q92552	Q6P1S1	ENSP00000261413	NP_055899	HIT000042397	OTTHUMP00000126943	0	0	0	0	0	0	0	0	0	0	0	1	0	0	0	0
IPI00008868	P46821	Q32NB7	ENSP00000296755	NP_005900		OTTHUMP00000126944		167	75	151	57	210	215	209	211	153	171	238	199	152	187	174	2719
IPI00307757	Q9BZ71		ENSP00000262483	NP_112497	HIT000077795	OTTHUMP00000128203	0	0	0	0	0	0	0	0	0	0	0	0	1	0	0	0
IPI00646689	Q9BRA2		ENSP00000250101	NP_116120	HIT000278265	OTTHUMP00000128227	0	0	0	0	0	0	0	0	1	0	0	0	1	0	0	0
IPI00012585	P07686	Q5URX0	ENSP00000261416	NP_000512	HIT000078589	OTTHUMP00000128232	0	0	0	0	0	0	0	1	0	1	0	0	0	0	0	0
IPI00328400	Q86SH2		ENSP00000329803	NP_783318	HIT000085176	OTTHUMP00000128286	0	0	0	0	1	0	0	0	0	0	0	0	0	0	0	0
IPI00016405		Q9BZE8	ENSP00000264312	NP_060300	HIT000077439	OTTHUMP00000128288	0	0	1	0	2	1	0	0	3	4	2	3	1	1	2	0
IPI00023103	O14641	Q53XM0	ENSP00000005340	NP_004413	HIT000036867	OTTHUMP00000128349	0	0	0	0	1	1	0	0	0	0	0	0	0	0	0	0
IPI00028031	P49748	Q53HR2	ENSP00000325395	NP_000009	HIT000036030	OTTHUMP00000128351	7	4	5	1	4	4	4	4	8	12	10	8	4	2	6	4
IPI00217236	O75347	Q6FGD7	ENSP00000306362	NP_004598	HIT000038316	OTTHUMP00000128368	3	3	6	0	3	1	1	3	6	7	1	1	1	1	1	1
IPI00028450	P32418	Q4QQG6	ENSP00000332931	NP_066920	HIT000196805	OTTHUMP00000128378	4	2	5	1	4	4	0	0	2	2	6	5	2	2	2	2
IPI00176424	Q8NFZ4		ENSP00000305288	NP_065846	HIT000078584	OTTHUMP00000135277	0	0	0	0	0	0	0	0	0	1	0	4	0	0	0	0
IPI00025491	P60842	Q9NZR9	ENSP00000293831	NP_001407	HIT000281563	OTTHUMP00000135288	0	0	0	0	0	1	0	0	0	2	3	0	0	0	0	0
IPI00004101	Q93088	Q6EI07	ENSP00000274353	NP_001704	HIT000220188	OTTHUMP00000135297	0	0	1	0	0	0	0	0	0	0	0	0	0	0	0	0
IPI00009654	Q9Y5R8		ENSP00000302783	NP_067033	HIT000288761	OTTHUMP00000135311	0	0	1	0	1	0	0	0	1	0	0	0	0	0	0	0
IPI00307549	Q9BYJ1	Q3ZB74	ENSP00000314879	NP_067641	HIT000246141	OTTHUMP00000135319	0	0	0	0	0	0	0	0	0	0	0	0	0	0	1	0
IPI00455852	O94989		ENSP00000355026	NP_776089	HIT000000632	OTTHUMP00000135329	0	0	0	0	0	0	0	1	0	0	0	0	0	0	0	0
IPI00004534	O15067	Q6P4B4	ENSP00000313490	NP_036525	HIT000000067	OTTHUMP00000135330	0	0	2	1	0	0	1	0	2	1	0	0	0	1	0	1
IPI00397526	P35580	Q149N3	ENSP00000269243	NP_005955	HIT000196222	OTTHUMP00000135337	52	20	34	13	59	55	43	53	50	52	80	34	17	11	12	9
IPI00298949	O14976	Q3B835	ENSP00000314499	NP_005246	HIT000102008	OTTHUMP00000147520	0	0	1	0	0	0	0	0	1	3	3	1	0	0	0	0
IPI00024184		O14827	ENSP00000265080	NP_008840	HIT000072811	OTTHUMP00000147545	1	0	1	0	2	1	0	1	3	0	0	1	0	0	0	0
IPI00023601	P10915		ENSP00000274341	NP_001875	HIT000219844	OTTHUMP00000147586	19	8	14	1	11	12	6	8	16	16	17	10	0	1	3	1
IPI00550069	P13489	Q59GB3	ENSP00000346402	NP_002930	HIT000299066	OTTHUMP00000147628	22	6	13	4	13	12	17	16	11	19	21	20	17	15	26	23
IPI00017592	O95202		ENSP00000305653	NP_036450	HIT000064944	OTTHUMP00000149960	5	7	11	1	13	16	9	13	18	13	20	15	4	5	0	0
IPI00005634	Q6PGP7		ENSP00000351596	NP_055454	HIT000000078	OTTHUMP00000149977	0	0	0	0	1	0	0	0	0	0	1	0	0	0	0	0
IPI00219025	P35754	Q3KQS1	ENSP00000237858	NP_002055	HIT000273054	OTTHUMP00000149979	1	4	5	1	4	5	3	0	5	8	10	6	2	4	2	0
IPI00301961	P29120	Q59H85	ENSP00000308024	NP_000430	HIT000322703	OTTHUMP00000151175	0	0	0	0	0	1	0	0	0	0	0	0	0	0	0	0
IPI00550440	Q8N357		ENSP00000345528	NP_060347		OTTHUMP00000158508		0	0	1	0	0	0	0	0	1	0	0	0	1	0	0	3
IPI00220859	P20810	Q86YM9	ENSP00000327799	NP_001035911		OTTHUMP00000158518		2	0	0	0	0	0	1	1	2	4	5	0	1	3	0	19
IPI00028109	Q9C005		ENSP00000295066	NP_115963	HIT000037430	OTTHUMP00000158573	1	0	0	0	0	0	0	0	0	0	1	1	0	0	0	0
IPI00018808		Q9HCM1	ENSP00000310338	NP_060639	HIT000017266	OTTHUMP00000158617	0	0	0	0	0	0	0	0	0	0	1	0	0	0	0	0
IPI00329025		Q8N5M9	ENSP00000306106	NP_115881	HIT000081795	OTTHUMP00000158646	1	0	2	0	0	0	0	0	0	0	0	0	0	0	0	0
IPI00014439	P09417	Q53F52	ENSP00000281243	NP_000311	HIT000194450	OTTHUMP00000158671	18	15	12	4	11	13	22	18	22	35	51	44	68	58	71	70
IPI00027827	P08294	Q16867	ENSP00000226877	NP_003093	HIT000036686	OTTHUMP00000158715	0	0	0	0	0	0	0	0	0	0	0	0	1	0	0	0
IPI00031670		Q6MZV4	ENSP00000351740	NP_612398	HIT000052389	OTTHUMP00000158735	0	0	0	0	0	0	1	0	0	0	0	0	0	0	0	0
IPI00022421	O14548	Q6FGA0	ENSP00000234301	NP_004709	HIT000017778	OTTHUMP00000158765	4	2	2	0	5	9	3	3	6	9	4	6	5	6	7	8
IPI00296563		Q5XKM8	ENSP00000281543	NP_068746	HIT000006556	OTTHUMP00000158768	0	0	0	0	0	0	0	0	2	0	0	0	0	0	0	0
IPI00375584		Q6ZRS4	ENSP00000313062	NP_919276	HIT000047899	OTTHUMP00000158773	0	1	0	0	0	0	0	0	0	0	0	0	1	0	0	0
IPI00152594	Q8TDS5		ENSP00000294971	NP_683765	HIT000042930	OTTHUMP00000158809	0	0	0	0	0	0	1	0	0	0	0	0	0	0	0	0
IPI00409758		Q0JVP3	ENSP00000282406	NP_742066	HIT000027119	OTTHUMP00000158830	0	0	0	0	0	0	0	0	0	0	1	0	0	0	0	0
IPI00009791	Q01814		ENSP00000353414	NP_001001331	HIT000322606	OTTHUMP00000158863	3	2	5	0	10	6	1	5	2	0	4	2	0	1	0	0
IPI00022296	P10721	Q14708	ENSP00000288135	NP_000213	HIT000321163	OTTHUMP00000158901	0	0	0	0	0	0	0	1	0	0	0	0	0	0	0	0
IPI00021396	P35968	Q59EB0	ENSP00000263923	NP_002244	HIT000063201	OTTHUMP00000158928	0	0	0	0	0	0	1	0	0	0	0	0	0	0	0	0
IPI00307572	Q9HC07		ENSP00000257288	NP_060945	HIT000002333	OTTHUMP00000158929	0	0	0	0	0	0	0	0	0	0	0	0	1	0	1	0
IPI00006557		O43164	ENSP00000354775	NP_055634	HIT000000155	OTTHUMP00000158944	0	0	0	0	0	0	0	1	0	0	0	0	0	0	0	0
IPI00385928	Q8NC60		ENSP00000264230	NP_115689	HIT000023045	OTTHUMP00000158975	0	0	1	0	0	0	0	0	0	0	0	0	0	0	0	0
IPI00217519	P11233		ENSP00000005257	NP_005393	HIT000052273	OTTHUMP00000158977	8	3	2	2	6	9	6	2	6	6	5	2	6	4	12	12
IPI00430411	Q16566		ENSP00000282356	NP_001735	HIT000192602	OTTHUMP00000159000	4	0	0	0	6	6	3	2	8	5	6	0	0	0	0	0
IPI00295889	P09132		ENSP00000282999	NP_003126	HIT000035137	OTTHUMP00000159018	0	0	0	0	0	0	0	1	0	0	0	0	0	0	0	0
IPI00173347		Q76N89	ENSP00000265522	NP_055867	HIT000000028		0	0	0	0	0	1	0	0	0	0	0	0	0	0	0	0
IPI00307684		O15050	ENSP00000374072	XP_047357	HIT000000048		1	3	0	1	1	2	1	1	2	0	0	0	0	0	0	0
IPI00472614	O15083	Q2T9F6	ENSP00000288221	NP_056391	HIT000000084		1	0	0	0	0	0	1	1	0	0	0	1	0	0	0	0
IPI00022370	O14529	Q9BZV4	ENSP00000261726	NP_056082	HIT000000110		0	0	0	0	0	0	1	0	0	0	0	0	0	0	0	0
IPI00465123	O43299	Q8N3X2	ENSP00000297562	NP_055670	HIT000000132		0	1	0	0	0	0	0	0	0	0	0	0	0	0	0	0
IPI00744848					HIT000000213		0	0	0	0	0	0	0	0	0	0	0	0	1	0	0	0
IPI00012645	O15020		ENSP00000311489	NP_008877	HIT000000227		25	10	29	11	43	41	28	39	38	35	50	38	14	14	12	4
IPI00297224		O60279	ENSP00000308727	XP_171054	HIT000000244		1	0	0	0	0	0	0	0	0	0	0	0	0	0	0	0
IPI00028561	O60282	Q6PJC4		XP_943222	HIT000000248		3	2	2	1	4	1	5	1	0	2	6	2	0	1	0	0
IPI00028566	O60285		ENSP00000261402	NP_055655	HIT000000254		0	1	0	0	0	0	0	0	0	0	0	0	0	0	0	0
IPI00307155	O75116	Q14DU5	ENSP00000317985	NP_004841	HIT000000344		3	0	2	0	3	3	6	2	2	1	4	0	1	0	0	1
IPI00307200	Q9UH65		ENSP00000315630	NP_055870	HIT000000365		0	0	0	0	0	0	0	1	0	0	0	0	0	0	0	0
IPI00000706	Q9Y4D2		ENSP00000257215	NP_006124	HIT000000384		1	0	0	0	0	1	0	0	0	0	0	2	0	0	0	0
IPI00374208	O75155		ENSP00000295989	NP_036430	HIT000000392		0	0	0	0	0	1	0	0	4	3	2	1	0	0	0	0
IPI00746756		O75160	ENSP00000262444	NP_055674	HIT000000397		1	0	0	0	0	0	0	0	0	0	5	2	0	0	0	0
IPI00479669		O75183	ENSP00000279907	NP_055869	HIT000000426		0	0	0	0	2	0	0	1	0	0	0	0	0	0	0	0
IPI00015568	O94819	Q3L1I0	ENSP00000321544	NP_055682	HIT000000436		12	5	4	3	9	6	8	6	7	9	15	18	9	6	6	10
IPI00240432	O94823	Q2YDW8	ENSP00000313600	XP_932686	HIT000000440		0	0	0	0	0	0	0	0	0	1	0	0	0	0	0	0
IPI00015602	O94826	Q6P0M2	ENSP00000284320	NP_055635	HIT000000444		19	15	26	15	24	24	20	18	19	24	42	22	12	8	11	8
IPI00017297	P43243	Q5CZA7	ENSP00000354346	NP_061322	HIT000000448		9	3	4	7	11	12	10	9	6	5	8	5	3	3	0	3
IPI00329719	O94832	Q7Z3N6	ENSP00000324527	NP_056009	HIT000000452		0	0	0	0	2	2	2	2	4	3	4	5	7	7	13	11
IPI00299254	O60841	Q53RV7	ENSP00000289371	NP_056988	HIT000000466		1	0	0	0	0	0	0	1	0	0	0	0	1	0	0	0
IPI00744221	O94887		ENSP00000264042	NP_055623	HIT000000518		2	0	0	0	0	0	0	1	0	1	0	0	0	0	0	0
IPI00289258	Q9HD67	O94893	ENSP00000274203	NP_036466	HIT000000524		0	0	0	0	0	1	0	0	0	0	0	0	0	0	0	0
IPI00001952	O94919		ENSP00000278505	XP_290546	HIT000000547		2	0	0	0	0	0	1	0	1	3	11	5	9	12	13	8
IPI00016621	O94973	Q53ET1	ENSP00000327694	NP_036437	HIT000000616		34	17	35	19	23	28	25	14	29	50	34	35	7	18	12	11
IPI00298912	Q9UQ03		ENSP00000261861	NP_006082	HIT000000642		2	1	1	0	4	6	4	5	6	6	2	1	0	1	1	0
IPI00180384		O00433	ENSP00000311273	NP_061720	HIT000000661		0	0	0	0	0	0	0	0	0	0	0	0	0	0	0	1
IPI00465088		Q8NDF7	ENSP00000342391	NP_055767	HIT000000662		0	0	0	0	0	0	0	0	0	0	0	0	0	1	0	0
IPI00745082		Q7LDD5	ENSP00000261793	NP_741960	HIT000000685		27	15	17	11	22	29	19	34	27	26	33	19	10	8	15	9
IPI00032187		Q6PGP3	ENSP00000339958	NP_009115	HIT000000692		0	0	0	0	0	1	0	0	2	3	2	0	0	0	0	0
IPI00032227	Q9Y2J0	Q6PJY8	ENSP00000374036	NP_055769	HIT000000702		27	11	15	8	15	16	11	4	30	20	15	16	9	3	7	7
IPI00032280	Q9Y2K9		ENSP00000273666	XP_045911	HIT000000723		3	0	1	1	2	1	0	0	0	0	0	0	0	0	0	0
IPI00479760	Q2M2I8	Q9BUD9	ENSP00000353757	NP_055726	HIT000000765		7	5	11	3	2	11	7	6	13	12	3	6	2	1	2	0
IPI00010334		Q8N498	ENSP00000285094	NP_055999	HIT000000809		0	0	0	0	0	0	0	0	2	0	0	0	0	0	0	0
IPI00402008	Q9UPN7	Q2M2H3	ENSP00000321013	NP_055746	HIT000000832		0	0	0	0	0	0	0	0	0	0	0	0	2	1	0	0
IPI00240059	Q9ULS5		ENSP00000261226	NP_065749	HIT000000861		0	0	0	0	0	0	1	0	0	0	0	0	0	0	0	1
IPI00020747	Q9NY72	Q17RL3	ENSP00000299333	NP_001035241	HIT000000874		0	0	0	0	1	1	2	2	0	0	0	0	0	0	0	0
IPI00382432	Q3T906	Q68CM9	ENSP00000299314	NP_077288	HIT000000924		0	0	0	0	0	1	0	0	0	0	0	0	0	0	0	0
IPI00008144	Q9ULJ8		ENSP00000344524	NP_060120	HIT000000938		0	0	0	0	2	1	3	1	0	2	0	1	0	0	0	0
IPI00017163		Q17RT5	ENSP00000260983	NP_065811	HIT000001016		0	1	0	0	2	3	0	0	2	1	1	0	0	0	0	0
IPI00002349	Q7Z417		ENSP00000225388	NP_065823	HIT000001036		0	1	0	0	0	0	0	0	0	0	0	0	0	0	0	0
IPI00103994	Q9P2J5	Q2TU79	ENSP00000274562	NP_064502	HIT000001067		1	0	0	1	4	2	1	4	2	1	0	0	0	0	0	0
IPI00002232	Q7L7X3		ENSP00000261716	NP_065842	HIT000001076		0	0	0	0	0	0	1	1	0	0	0	0	0	0	0	0
IPI00292914	Q9P2G1	Q4VBX8	ENSP00000265742	XP_377955	HIT000001101		1	0	0	0	0	0	0	0	0	0	0	0	0	0	0	0
IPI00029410		Q8N467	ENSP00000308268	XP_208522	HIT000001109		0	0	0	0	0	0	0	0	0	0	0	0	0	2	1	0
IPI00658210	Q8TAF3		ENSP00000307491	NP_065890	HIT000001164		0	0	0	0	0	0	2	2	0	0	0	0	0	0	0	0
IPI00784204		Q9P270	ENSP00000373617	XP_044434	HIT000001173		0	0	0	0	0	0	1	0	0	0	0	0	0	0	0	0
IPI00465045		Q8N1L5	ENSP00000301180	NP_775873	HIT000001178		1	0	0	0	0	0	1	2	0	0	0	0	0	0	2	0
IPI00292791	Q9P232		ENSP00000263665	NP_065923	HIT000001211		0	0	0	0	0	0	0	0	0	0	0	1	0	0	0	0
IPI00165931	Q9HCM2		ENSP00000251675		HIT000001265		1	0	0	0	1	2	0	0	0	0	2	1	0	0	0	0
IPI00030466		Q9HCD6	ENSP00000374171	XP_371074	HIT000001351		0	0	0	0	0	2	1	2	0	1	1	0	0	0	0	0
IPI00288918	Q9HCC9	Q49AA1	ENSP00000290974	NP_066023	HIT000001358		0	0	0	0	0	1	0	0	0	0	0	0	0	0	0	0
IPI00784838		Q9BYA0			HIT000001376		0	0	0	0	0	0	0	0	0	0	0	0	0	0	1	0
IPI00304589	Q9C0C2	Q6PJ35	ENSP00000350990	NP_203754	HIT000001457		0	0	0	0	2	0	0	0	2	0	0	0	0	0	0	0
IPI00064262	Q96JQ0		ENSP00000299441	NP_003728	HIT000001490		0	0	0	0	0	0	0	0	0	0	0	1	0	0	0	1
IPI00064200	Q8IZL2		ENSP00000327563	NP_115803	HIT000001534		0	0	1	0	0	0	0	0	0	0	0	0	0	0	0	0
IPI00101923		Q4VC11	ENSP00000261866	NP_079413	HIT000001555		0	0	0	0	0	0	0	0	0	1	0	0	0	0	0	0
IPI00044748		Q14CC9	ENSP00000334991	NP_443137	HIT000001617		0	0	0	0	1	0	2	1	3	0	0	3	1	5	6	4
IPI00291868	Q8TF61	Q2M1V8	ENSP00000295133	XP_001133175	HIT000001655		1	0	1	1	2	0	1	0	0	1	1	0	0	0	0	0
IPI00219381	O43678		ENSP00000252102	NP_002479	HIT000001785		0	0	0	2	2	0	0	1	5	9	5	8	5	5	1	0
IPI00783982	Q9Y678	Q54AC4	ENSP00000374396	NP_057212	HIT000001859		2	0	3	1	0	0	0	0	3	2	1	2	0	0	0	0
IPI00005966	Q9UI09	Q53HG1	ENSP00000330737	NP_061326	HIT000001888		4	1	2	4	5	1	3	1	1	0	1	0	0	0	1	0
IPI00448095	Q7Z4W1		ENSP00000303356	NP_057370	HIT000001904		3	0	3	0	2	5	0	2	5	5	7	5	0	1	1	2
IPI00038378		Q7Z4C5	ENSP00000273920	NP_067027	HIT000001906		1	0	0	0	0	0	1	3	4	3	1	3	0	3	2	0
IPI00027252	Q99623	Q2YDA4		NP_009204	HIT000001949		29	17	18	14	35	35	22	23	27	29	33	28	12	17	15	14
IPI00219229	P62310	Q6IAH0	ENSP00000302160	NP_055278	HIT000002189		1	0	0	0	0	0	0	0	0	0	0	0	0	0	0	0
IPI00001538	Q9Y5J6		ENSP00000254616	NP_036324	HIT000002202		0	0	0	0	0	0	0	0	0	0	0	1	0	0	0	0
IPI00030919	Q9UHA4	Q53FH6	ENSP00000226522	NP_068805	HIT000002234		2	0	0	1	1	0	0	1	0	0	0	0	0	0	0	0
IPI00470811	Q9NRH2	Q13612	ENSP00000296088	NP_060189	HIT000002357		0	0	0	0	0	0	0	0	0	0	0	0	0	0	1	0
IPI00023001		Q96A26	ENSP00000232125	NP_055182	HIT000002401		2	1	1	1	8	4	6	3	7	6	9	9	4	7	5	3
IPI00549467		Q8WUF0	ENSP00000265259	NP_064587	HIT000002423		0	0	0	0	0	1	0	0	3	3	1	2	0	0	0	0
IPI00020495	P82909		ENSP00000256441	NP_150597	HIT000002452		6	2	7	2	5	10	4	4	7	3	4	2	3	1	2	1
IPI00005163		Q6IAD0	ENSP00000329964	NP_061960	HIT000002533		0	0	0	0	0	0	0	0	2	4	1	0	0	0	0	0
IPI00007814	P21283		ENSP00000285415	NP_001686	HIT000002539		28	13	19	14	18	25	24	26	32	36	35	32	10	12	6	8
IPI00000581	Q96FW1	Q659F9	ENSP00000301453	NP_060140	HIT000002595		12	4	4	3	7	10	13	13	5	12	17	11	2	7	6	5
IPI00016443		Q9NX18	ENSP00000301761	NP_060311	HIT000002969		2	1	2	0	1	1	0	1	0	3	2	0	0	0	0	0
IPI00017285		Q9NWP7			HIT000003182		0	0	0	0	0	0	1	0	0	0	0	0	0	0	0	0
IPI00329321	Q5U5X0		ENSP00000334660	NP_859056	HIT000003278		0	0	0	0	0	0	0	0	0	1	0	0	0	0	0	0
IPI00016342	P51149		ENSP00000265062	NP_004628	HIT000003301		6	8	5	1	14	16	11	8	21	20	19	14	10	10	11	8
IPI00024282	Q92930	Q5JPC4	ENSP00000312734	NP_057614	HIT000003585		0	0	0	0	0	1	0	0	0	0	0	0	0	0	0	0
IPI00018272	Q9NVS9	Q53FP0	ENSP00000225573	NP_060599	HIT000003871		3	0	1	0	7	7	3	3	5	5	6	1	4	4	1	0
IPI00018878	Q7L190		ENSP00000335306	NP_060659	HIT000004049		0	0	0	0	0	0	1	0	0	0	0	0	0	0	0	0
IPI00019376	Q9NVA2	Q4W5G1	ENSP00000264893	NP_060713	HIT000004185		17	10	16	9	16	20	10	12	23	25	21	20	5	8	5	12
IPI00184546		Q8WUH6	ENSP00000280756	NP_689474	HIT000004205		0	0	0	0	0	0	2	0	0	0	0	0	0	0	0	0
IPI00029403	O95219	Q9H398	ENSP00000251775	NP_003785	HIT000004309		4	1	2	0	4	3	0	0	6	7	3	3	0	0	0	0
IPI00012451	Q9HAV0		ENSP00000232564	NP_067642	HIT000004364		5	5	8	4	9	8	9	5	3	7	10	8	1	0	1	2
IPI00303318	Q9NUQ9	Q68D08	ENSP00000350710	NP_057707	HIT000004533		7	1	5	3	3	5	5	3	11	6	8	5	10	12	7	13
IPI00550181	Q9UQN3		ENSP00000263780	NP_054762	HIT000004639		0	0	0	0	0	0	0	1	0	0	0	0	0	0	0	0
IPI00020075		Q8TCF9	ENSP00000273359	NP_060864	HIT000004678		3	1	2	1	4	4	2	1	7	6	6	6	1	0	0	0
IPI00153023		Q96ER9	ENSP00000296441	NP_078937	HIT000005772		0	0	0	0	0	0	0	0	2	0	1	0	0	0	0	0
IPI00328200		Q2TAL8	ENSP00000350094	NP_060200	HIT000005798		1	0	0	0	0	0	0	0	0	0	0	0	0	0	0	0
IPI00007694	Q9Y570		ENSP00000329867	NP_057231	HIT000005999		0	0	3	0	3	2	2	0	4	2	1	1	3	2	3	2
IPI00016385		Q9H9H5	ENSP00000314560	NP_079147	HIT000006084		1	0	0	1	0	0	1	0	0	0	0	0	2	6	2	0
IPI00743257					HIT000006237		0	0	0	0	0	0	0	0	0	0	0	0	1	0	0	0
IPI00009673	Q9H902		ENSP00000165698	NP_075063	HIT000006446		0	0	0	0	2	0	1	2	0	0	0	0	2	2	1	2
IPI00413436		Q49B96	ENSP00000342015	NP_001026788	HIT000006459		0	0	0	0	2	2	0	0	0	0	0	0	0	0	0	0
IPI00018627		Q9GZZ1	ENSP00000240922	NP_079422	HIT000006530		0	0	0	0	0	0	1	0	0	0	1	0	0	0	0	0
IPI00736251		Q6PI86	ENSP00000228705	XP_350881	HIT000006589		4	2	1	2	2	4	2	2	9	3	4	3	2	0	0	1
IPI00299095	O60749	Q53GG3	ENSP00000368831	NP_003091	HIT000006855		2	0	2	2	2	0	2	0	0	0	2	0	1	0	0	0
IPI00426289	Q9UHH9		ENSP00000331103	NP_001005909	HIT000007319		0	0	0	0	0	0	0	0	0	0	0	0	0	0	0	1
IPI00219472	Q8IV01	Q8NDM9	ENSP00000310733	NP_808878	HIT000007554		0	0	0	1	3	2	1	3	4	1	0	1	0	0	0	0
IPI00019269	Q9GZS3		ENSP00000267973	NP_079510	HIT000008028		0	0	0	0	0	0	0	0	1	3	0	2	0	0	1	0
IPI00006598	Q9H0C6		ENSP00000316391		HIT000008124		0	0	0	0	0	0	0	0	0	1	0	0	0	0	0	0
IPI00396321	Q96AG4		ENSP00000225972	NP_060979	HIT000008602		2	0	0	1	1	1	2	1	2	2	4	0	0	0	0	0
IPI00436833		Q6S5B2			HIT000008617		0	0	0	0	0	0	0	0	0	0	1	0	0	0	0	0
IPI00445805		Q6ZUS7	ENSP00000367254		HIT000008777		0	0	0	0	0	0	0	0	0	0	0	1	0	0	0	0
IPI00007691	Q9Y296		ENSP00000351896	NP_057230	HIT000008897		0	0	0	0	0	0	0	1	0	0	0	0	0	0	0	1
IPI00025094		Q9H6N6	ENSP00000332036		HIT000008964		0	0	0	0	0	0	0	1	0	0	0	0	0	1	0	0
IPI00291751		Q658V9	ENSP00000295079	NP_078796	HIT000009482		0	0	0	0	0	0	2	0	2	0	0	0	0	0	0	0
IPI00021257	P53365		ENSP00000254584	NP_036534	HIT000009664		0	0	0	0	1	0	0	2	1	3	4	1	0	0	0	0
IPI00007752	P68371	Q6FGZ8	ENSP00000341289	NP_006079	HIT000009868		10	6	5	4	7	6	11	7	9	8	15	6	8	6	7	6
IPI00029264	P08574	Q5U062	ENSP00000317159	NP_001907	HIT000009907		20	17	20	12	13	15	13	15	13	11	15	13	10	8	5	8
IPI00064474		Q96K80	ENSP00000257940	NP_116175	HIT000010629		0	0	0	0	0	0	0	0	0	0	0	0	0	0	1	0
IPI00303722		Q0JTZ5	ENSP00000037869	NP_116211	HIT000010846		0	0	0	0	0	1	0	0	0	0	0	0	0	0	0	0
IPI00307683	Q9HC62	Q8IW97	ENSP00000296257	NP_067640	HIT000010871		0	0	0	0	0	0	0	0	0	0	0	0	0	0	0	1
IPI00045801	Q96SL8		ENSP00000221665	NP_116225	HIT000010946		0	0	0	0	0	0	0	0	1	0	0	0	0	0	0	0
IPI00011232		Q6FI59	ENSP00000262059	NP_065949	HIT000011153		0	0	0	0	0	0	0	1	0	2	0	0	0	0	0	0
IPI00070003		Q8ND87	ENSP00000320488	NP_715638	HIT000011303		0	0	0	0	0	0	0	0	1	0	0	0	0	0	0	0
IPI00289418	Q96NS5		ENSP00000293414	NP_543139	HIT000011341		0	0	0	0	0	0	0	0	0	0	0	0	0	0	0	1
IPI00007750	P68366		ENSP00000248437	NP_005991	HIT000011345		40	41	43	19	47	54	48	49	47	48	57	53	31	34	38	33
IPI00024821	O00487	Q4ZG77	ENSP00000263639	NP_005796	HIT000011742		0	0	0	1	0	1	0	0	0	0	0	0	0	0	1	0
IPI00043747	Q52LD8	Q14DH4	ENSP00000295049	NP_653230	HIT000011750		1	0	1	1	0	1	1	1	0	0	0	0	0	0	1	1
IPI00289382		Q96NM2	ENSP00000328647		HIT000011755		0	0	0	0	0	0	0	0	0	0	0	0	1	0	0	0
IPI00296318		Q2VPJ3	ENSP00000250024	NP_078956	HIT000011820		0	0	0	0	0	0	0	0	0	0	1	0	0	0	0	0
IPI00305212	Q9P000	Q53FR9	ENSP00000263401	NP_054905	HIT000012282		0	0	0	0	1	1	0	0	0	1	0	0	0	0	0	0
IPI00746409					HIT000012326		0	0	0	0	0	0	0	0	0	0	0	0	0	0	1	0
IPI00782980			ENSP00000373586		HIT000012349		0	1	0	0	0	0	0	0	0	0	0	0	0	0	0	0
IPI00465233		Q53HQ1	ENSP00000371099		HIT000012743		0	0	0	0	2	0	0	0	2	0	5	3	0	0	0	0
IPI00179589	P58546	Q69YG1	ENSP00000349140	NP_665807	HIT000012839		4	3	6	4	6	6	6	9	5	6	7	4	5	6	4	6
IPI00217787		Q6UX35	ENSP00000317818	NP_710152	HIT000012909		3	1	0	0	0	3	2	1	0	0	0	0	0	0	0	0
IPI00014537	O43852	Q0JT29	ENSP00000249364	NP_001210	HIT000012952		0	1	2	0	5	3	3	1	1	2	0	0	0	0	0	0
IPI00014320		Q9H0H3	ENSP00000336800	NP_071925	HIT000013277		0	0	0	0	0	0	0	0	1	0	0	0	0	0	0	0
IPI00101664	Q96I59	Q9H5H1	ENSP00000281038	NP_078954	HIT000013594		0	0	0	0	1	0	0	0	0	0	0	0	0	0	0	0
IPI00022240	Q9H1K1	Q0JU00	ENSP00000310623	NP_998760	HIT000013865		0	0	3	0	2	2	3	2	5	7	4	4	3	2	0	0
IPI00065287		Q96M46	ENSP00000309560	NP_689994	HIT000014006		0	0	0	0	0	0	1	0	0	0	0	0	0	0	0	0
IPI00749160					HIT000014052		0	0	0	0	0	1	0	0	0	0	0	0	0	0	0	0
IPI00455070				XP_498242	HIT000014162		0	0	0	0	0	2	0	0	1	1	2	1	1	2	0	1
IPI00002311		Q0VDG4	ENSP00000272732	NP_078859	HIT000014519		0	0	0	0	0	1	0	0	0	0	0	0	0	0	0	0
IPI00152701		Q8N3E9	ENSP00000313731	NP_588614	HIT000015020		0	0	0	0	1	4	0	0	0	0	2	2	0	0	0	0
IPI00296776	Q8N4S0	Q8WV71	ENSP00000278520	NP_079001	HIT000015086		0	0	0	0	0	1	0	0	0	0	0	0	0	0	0	0
IPI00007675	Q9Y6G9	Q6MZE7	ENSP00000273130	NP_057225	HIT000015128		3	1	3	2	6	6	6	5	4	9	7	1	4	4	3	2
IPI00171626	Q8NF37		ENSP00000283415	NP_079106	HIT000015311		0	0	2	1	0	0	0	0	1	0	0	0	0	0	0	1
IPI00300536		Q2VPK0	ENSP00000326340	NP_203746	HIT000015464		0	0	0	0	0	0	0	0	0	0	0	0	0	0	0	1
IPI00742658		Q8NBF4	ENSP00000347402		HIT000015493		0	0	0	0	0	0	0	0	0	0	1	0	0	0	0	0
IPI00048572	Q86Y79		ENSP00000334277	NP_001002913	HIT000015789		0	0	0	0	0	0	0	1	0	0	0	0	0	0	0	0
IPI00301294	Q8NC44		ENSP00000273048	NP_077269	HIT000015878		1	0	1	0	0	0	4	2	0	0	0	0	0	0	0	0
IPI00303161	Q96AP7		ENSP00000278927	NP_620411	HIT000015890		0	0	0	0	0	0	0	0	0	0	1	0	0	0	0	0
IPI00166291	Q7Z699		ENSP00000299084	NP_689807	HIT000016089		0	0	0	0	0	0	0	0	0	1	0	0	0	0	0	0
IPI00160783		Q59AC9	ENSP00000305533	NP_078948	HIT000016279		0	0	0	0	0	0	0	0	0	0	0	0	0	1	0	0
IPI00011898	Q13144	Q541Z1	ENSP00000273783	NP_003898	HIT000016513		0	0	0	0	0	0	0	0	0	0	0	1	0	0	0	0
IPI00435950		Q71RE8			HIT000016534		0	0	0	0	0	0	0	0	1	0	3	0	0	0	1	0
IPI00555734		Q567Q4	ENSP00000301776	NP_079356	HIT000016761		0	0	0	0	0	2	1	0	6	10	12	8	2	3	2	2
IPI00168093		Q8NAS2	ENSP00000348027		HIT000017059		0	0	0	0	0	0	0	0	0	0	1	0	0	0	0	0
IPI00745622					HIT000017084		0	0	0	0	0	0	0	0	0	0	1	0	0	0	0	0
IPI00397879			ENSP00000332809	NP_001025054	HIT000017117		0	0	0	0	0	0	0	0	0	0	0	0	0	1	0	0
IPI00168056	Q8NAP3	Q32Q70	ENSP00000372635	XP_001133510	HIT000017222		0	0	0	0	0	0	0	0	0	0	0	0	0	0	1	0
IPI00168043	Q8NAM6	Q3MIQ2	ENSP00000321963	NP_689890	HIT000017291		0	0	0	0	0	0	1	0	0	0	0	0	0	0	0	0
IPI00745320					HIT000017473		0	0	0	0	0	0	0	0	1	0	0	0	0	0	0	0
IPI00749268					HIT000017677		0	0	0	0	0	0	0	0	0	0	0	1	0	0	0	0
IPI00167948		Q8NAA6	ENSP00000325144	NP_997327	HIT000017881		0	0	0	0	0	0	0	0	0	1	0	0	0	0	0	0
IPI00302135		Q0R0N4	ENSP00000341765	NP_114161	HIT000017908		0	0	0	0	1	0	0	0	0	0	0	0	0	0	0	0
IPI00167918		Q8NA66	ENSP00000316547	NP_775809	HIT000017988		0	0	0	0	0	0	0	0	0	0	0	1	0	0	0	0
IPI00647650	O15372	Q53HG0	ENSP00000276682	NP_003747	HIT000017995		0	0	1	0	2	0	0	2	1	2	3	1	0	0	0	0
IPI00167893		Q8NA20		NP_997336	HIT000018120		0	0	0	0	0	0	0	0	0	0	0	0	0	1	0	0
IPI00783899			ENSP00000365054		HIT000018241		0	0	0	0	0	1	0	0	0	0	0	0	0	0	0	0
IPI00746394					HIT000019033		0	0	0	0	0	0	0	0	0	0	1	0	0	0	0	0
IPI00455497			ENSP00000372381	XP_001128423	HIT000019164		0	0	0	0	0	0	0	0	0	1	0	0	0	0	0	0
IPI00747683					HIT000019225		0	0	0	0	0	1	0	0	0	0	0	0	0	0	0	0
IPI00009439	P21579	Q6AI31	ENSP00000261205	NP_005630	HIT000019471		40	35	53	39	69	71	52	56	42	51	58	66	33	25	20	25
IPI00167710		Q53RD9	ENSP00000331411	NP_694946	HIT000019614		0	0	0	0	0	1	0	0	0	0	0	0	0	0	0	1
IPI00745880					HIT000019620		0	0	0	0	0	0	0	0	1	0	0	0	0	0	0	0
IPI00032128		Q9Y2G0	ENSP00000334769	XP_039733	HIT000020045		0	0	0	0	0	1	0	1	0	1	0	0	0	0	0	0
IPI00745625					HIT000020211		0	0	0	0	0	0	0	0	0	0	0	0	0	1	0	0
IPI00329662		Q9H7E0	ENSP00000341597	NP_061161	HIT000020301		0	0	2	1	1	0	0	0	0	0	0	0	0	0	0	0
IPI00383729	P83369		ENSP00000286307	NP_775762	HIT000020447		0	0	1	0	0	0	0	0	0	0	0	0	0	0	0	0
IPI00024620		Q9NPA8	ENSP00000339861	NP_064574	HIT000020506		0	0	0	0	0	0	0	0	0	1	0	0	0	0	0	0
IPI00006252	Q12904		ENSP00000350699	NP_004748	HIT000020806		3	0	2	0	3	0	1	0	0	0	0	2	0	1	0	0
IPI00783160					HIT000020897		0	0	0	0	0	0	0	0	0	0	0	1	0	0	0	0
IPI00744929					HIT000020951		0	1	0	0	0	0	0	0	0	0	0	0	0	0	0	0
IPI00176466		Q8N8P5	ENSP00000295844	XP_092342	HIT000021235		0	0	0	0	0	0	0	1	0	0	0	0	0	0	0	0
IPI00166202	Q8N1N0		ENSP00000272367	NP_775806	HIT000021284		0	0	0	0	0	1	0	0	0	0	0	0	0	0	0	0
IPI00045208	Q96RE9	Q17RP3	ENSP00000274599	NP_443092	HIT000021320		0	0	0	0	0	0	0	0	1	0	0	0	0	0	0	0
IPI00395510	P61601	Q0JTD9	ENSP00000310587	NP_001035714	HIT000021370		19	15	17	14	21	13	25	9	12	13	16	11	7	5	11	10
IPI00018537	Q99884	Q0VG81	ENSP00000230671	NP_055043	HIT000021462		1	0	0	0	0	0	2	2	2	0	4	2	0	0	0	1
IPI00784060					HIT000021512		0	0	0	0	0	0	0	1	0	0	0	0	0	0	0	0
IPI00023748	Q13765	Q3KQV4	ENSP00000349212	NP_005585	HIT000021554		3	3	1	1	0	2	3	5	1	6	5	7	1	0	0	0
IPI00556265					HIT000021935		0	1	0	1	0	0	0	0	0	0	0	0	0	0	0	0
IPI00395463	Q8WUX9		ENSP00000324491	NP_689485	HIT000022057		0	0	0	0	0	0	0	0	1	0	0	0	0	0	0	0
IPI00167261		Q8N801	ENSP00000294947	NP_775920	HIT000022345		0	0	0	0	0	0	0	0	1	0	0	0	0	0	0	0
IPI00740057		Q8N7Z5	ENSP00000274361	XP_932764	HIT000022364		0	0	1	0	0	0	0	0	0	0	0	0	0	0	0	0
IPI00550523		Q6DD88	ENSP00000329034	NP_056274	HIT000022442		0	0	0	0	0	0	0	0	0	0	1	0	0	0	0	0
IPI00008380	P67775		ENSP00000231504	NP_002706	HIT000022453		5	1	1	0	6	4	4	1	1	2	0	1	2	1	2	2
IPI00012011	P23528		ENSP00000309629	NP_005498	HIT000022544		36	30	32	25	47	43	43	42	51	51	64	51	49	36	42	34
IPI00746479					HIT000022776		0	0	0	0	0	0	0	0	1	0	0	0	0	0	0	0
IPI00013043	O94811	Q4L233	ENSP00000353785	NP_008961	HIT000023222		46	43	48	41	64	73	84	78	138	113	147	105	85	95	86	90
IPI00329646	Q9H0N5		ENSP00000254908	NP_115527	HIT000023325		0	0	0	0	0	1	0	0	0	0	0	0	0	0	0	0
IPI00167178		Q8N7D3	ENSP00000319090		HIT000023467		1	0	0	0	0	0	0	0	0	0	0	0	0	0	0	0
IPI00022021	Q92561		ENSP00000320017	NP_055574	HIT000023573		3	6	5	5	8	10	6	6	3	6	6	2	1	3	0	2
IPI00291608	Q8WW12	Q53GF3	ENSP00000265260	NP_065090	HIT000023590		1	0	2	1	0	0	0	0	0	0	1	0	0	0	0	0
IPI00550495		Q0JS81	ENSP00000296736	NP_112215	HIT000025135		1	0	0	0	0	0	0	0	0	0	0	0	0	0	0	0
IPI00031084		Q0JRX1	ENSP00000274710	NP_115665	HIT000025155		0	0	1	0	0	0	0	0	0	0	0	0	0	0	0	0
IPI00477759	Q9H0H0	Q0JTA6	ENSP00000251334	NP_065799	HIT000025396		0	0	0	0	0	0	0	1	0	0	0	0	0	0	0	0
IPI00100160	Q86VP6		ENSP00000299218	NP_060918	HIT000025406		38	18	25	20	21	20	26	20	37	40	34	34	25	18	25	23
IPI00100154	Q9H0E2	Q6FIE9	ENSP00000314733	NP_061882	HIT000025431		2	0	2	2	1	1	1	0	5	0	3	4	1	0	2	5
IPI00031064		Q9H061	ENSP00000306887	NP_115649	HIT000025537		2	2	0	2	2	1	2	1	0	2	0	0	1	0	0	1
IPI00008453	Q9ULV4	Q53G58	ENSP00000261401	NP_055140	HIT000026240		9	3	3	2	4	4	3	2	7	4	9	6	1	0	0	2
IPI00179415	Q08209	Q9UMM5	ENSP00000320580	NP_000935	HIT000026275		47	29	34	17	37	35	30	31	15	19	22	26	25	28	34	18
IPI00166786		Q8N4V2	ENSP00000299134	NP_061181	HIT000026320		0	0	0	0	0	1	0	0	0	1	1	0	0	0	0	0
IPI00743777					HIT000026537		0	0	0	0	0	0	0	0	0	1	0	0	0	0	0	0
IPI00045550	Q96SB3	Q96B17	ENSP00000320510	NP_115984	HIT000026567		0	1	3	0	6	6	7	6	1	2	1	2	0	2	0	0
IPI00186966	O00499	Q659B7	ENSP00000316779	NP_647593	HIT000026622		21	8	19	9	33	31	32	39	26	33	46	46	61	55	85	73
IPI00175136	Q8NDT2	Q0VA89	ENSP00000313890	NP_037418	HIT000026750		0	0	0	0	0	0	0	0	0	1	0	0	0	0	0	1
IPI00472794		Q0JRZ9	ENSP00000344034	NP_620137	HIT000026883		0	0	1	0	0	0	0	0	0	0	0	0	0	0	0	0
IPI00023647		Q4W5K0	ENSP00000313454	NP_060697	HIT000026927		0	0	2	0	0	0	1	0	0	0	2	2	0	1	0	1
IPI00418639		Q6JQN1	ENSP00000325137	NP_079523	HIT000026955		0	0	0	1	0	0	0	0	0	0	0	0	0	0	0	0
IPI00784125					HIT000027209		0	0	0	0	0	0	0	0	1	0	0	0	0	0	0	0
IPI00396131	Q7Z739	Q0JRX8	ENSP00000368753	NP_689971	HIT000027247		0	0	0	1	0	2	0	0	0	0	0	0	0	0	0	0
IPI00217616		Q4ZG87	ENSP00000286181	NP_776183	HIT000027258		0	0	1	1	0	1	0	0	0	0	1	0	0	0	0	0
IPI00745180				XP_373030	HIT000027290		1	0	0	0	0	0	0	0	0	0	0	0	0	0	0	0
IPI00749075					HIT000027602		0	0	0	0	0	0	1	0	0	0	0	0	0	0	0	0
IPI00064742		Q96KR5	ENSP00000328611		HIT000027695		0	0	1	0	0	0	0	0	0	0	0	0	0	0	0	0
IPI00470619	P59768	Q5JPE2	ENSP00000334448	NP_444292	HIT000027790		1	0	6	0	2	2	2	3	4	1	3	4	2	3	1	2
IPI00719173		Q0IJ45	ENSP00000313788	NP_060232	HIT000028001		0	0	0	0	0	0	0	0	0	0	0	1	1	1	4	1
IPI00383439		Q8IW35	ENSP00000342510	NP_078824	HIT000028181		0	0	0	1	0	0	0	0	0	0	0	0	0	0	0	0
IPI00748681					HIT000028202		0	0	0	0	0	0	0	0	1	0	0	0	0	0	0	0
IPI00175833			ENSP00000335651	NP_001007123	HIT000028207		1	0	0	0	0	0	0	0	0	0	0	0	0	0	0	0
IPI00396403		Q5JPB3	ENSP00000283285	NP_937839	HIT000028593		0	0	0	0	0	0	0	0	1	0	0	0	0	0	0	0
IPI00329625		Q8NDM4	ENSP00000258770	NP_004740	HIT000028713		1	0	0	0	1	2	1	0	0	0	1	0	0	0	0	0
IPI00442782		Q6ZP18			HIT000028811		0	0	0	0	0	0	0	0	0	1	0	0	0	0	0	0
IPI00401773		Q8N3K4	ENSP00000301765	NP_060436	HIT000028991		0	0	0	0	0	1	0	0	0	2	1	0	0	0	0	0
IPI00441083		Q6P675			HIT000029121		0	0	0	0	0	0	0	0	0	1	0	0	0	0	0	0
IPI00294501	Q9UBM7		ENSP00000347717	NP_001351	HIT000029312		0	0	0	0	0	0	0	0	0	0	0	0	0	0	1	0
IPI00012772	P62917	Q567Q7	ENSP00000262584	NP_000964	HIT000029326		0	0	0	0	0	2	0	0	0	0	0	0	0	0	0	0
IPI00013004	O00764		ENSP00000291565	NP_003672	HIT000029363		12	5	11	7	12	15	11	21	24	18	25	27	12	15	18	14
IPI00641950	P63244	Q53HU2	ENSP00000374249	NP_006089	HIT000029437		6	1	2	1	6	6	4	3	7	4	6	5	1	1	1	0
IPI00155601	Q9BQ69		ENSP00000255681	NP_054786	HIT000029477		0	0	0	0	0	0	0	0	3	4	2	3	0	0	0	0
IPI00008475	Q01581	Q5XJ04	ENSP00000322706	NP_002121	HIT000029496		0	0	0	0	1	0	0	0	0	0	0	0	0	0	0	0
IPI00337741	P13798		ENSP00000296456	NP_001631	HIT000029553		0	0	1	0	3	1	0	0	1	1	2	2	1	2	2	0
IPI00003949	P61088	Q53Y81	ENSP00000316176	NP_003339	HIT000029585		11	13	14	10	19	15	20	22	18	15	11	26	16	17	15	11
IPI00479186	P14618	Q8WUW7	ENSP00000373740	NP_002645	HIT000029665		6	4	7	0	10	9	1	2	8	11	10	12	10	9	6	6
IPI00005161	O15144	Q53R19	ENSP00000327137	NP_005722	HIT000029757		5	8	6	9	8	10	6	2	10	8	4	4	3	1	2	1
IPI00784301					HIT000029763		0	0	0	0	0	0	0	0	0	0	0	0	0	1	0	0
IPI00555744		Q45RF0	ENSP00000345156	NP_001030168	HIT000029769		0	0	0	0	0	0	0	0	0	1	1	0	0	0	0	0
IPI00021327	P62993	Q6ICN0	ENSP00000339007	NP_002077	HIT000029789		8	5	7	7	13	11	13	11	3	7	5	5	3	3	2	3
IPI00296526	Q9UJ70	Q53HD5	ENSP00000244204	NP_060037	HIT000030081		1	0	0	0	1	0	1	1	1	4	2	4	2	2	2	1
IPI00022228	Q00341	Q2HJC8	ENSP00000312042	NP_005327	HIT000030200		0	0	0	0	1	1	0	0	0	1	2	0	0	0	0	0
IPI00009958	Q92905		ENSP00000350512	NP_006828	HIT000030207		2	0	0	0	0	3	1	2	0	3	1	2	0	0	0	0
IPI00006754	P61962		ENSP00000308344	NP_005819	HIT000030271		0	0	1	0	0	0	0	0	0	0	0	0	0	0	0	0
IPI00020947	Q9NYD6	Q53XI4	ENSP00000307321	NP_059105	HIT000030298		0	0	0	0	0	0	0	0	0	1	0	0	0	0	0	0
IPI00031697	Q9BVC6		ENSP00000227525	NP_076997	HIT000030310		2	0	0	0	0	0	0	0	2	1	1	0	0	0	1	1
IPI00006865	O75396			NP_004883	HIT000030350		8	2	5	1	4	6	8	8	1	3	5	7	3	5	3	3
IPI00291005	P40925		ENSP00000233114	NP_005908	HIT000030445		90	70	62	45	57	58	62	69	78	83	74	82	65	65	63	68
IPI00170786	Q9Y2W2		ENSP00000261167	NP_057396	HIT000030523		0	0	0	0	1	2	2	3	0	0	0	0	0	0	0	0
IPI00010157	P31153		ENSP00000303147	NP_005902	HIT000030575		6	4	3	2	5	3	6	4	1	5	2	1	4	2	1	0
IPI00299399	P04271		ENSP00000291700	NP_006263	HIT000030635		38	47	26	32	43	44	70	70	9	16	31	20	141	122	65	62
IPI00219005	Q02790		ENSP00000001008	NP_002005	HIT000030649		13	3	7	9	19	13	10	9	12	7	12	9	2	0	6	3
IPI00024291	Q92934	Q6FH21	ENSP00000309103	NP_004313	HIT000030732		0	0	0	0	0	0	0	0	1	0	0	0	0	0	0	0
IPI00607799	Q9BUT1		ENSP00000296424	NP_064524	HIT000030779		0	0	0	0	0	0	0	0	1	0	0	1	0	0	1	1
IPI00005537	P52815	Q96Q74	ENSP00000333837	NP_002940	HIT000030814		0	0	0	0	1	1	1	2	2	4	0	0	2	1	0	0
IPI00396023	O14810			NP_006642	HIT000030918		1	3	2	0	5	3	2	2	5	2	2	1	1	2	1	3
IPI00746165	O75083	Q53GN4	ENSP00000371890	NP_059830	HIT000030935		5	3	8	1	11	3	1	4	8	6	9	7	5	3	3	5
IPI00010320	P83916	Q6IBN6	ENSP00000225603	NP_006798	HIT000031032		0	0	0	0	1	2	1	0	0	0	0	0	0	0	0	0
IPI00018671	P51452	Q5U0J1	ENSP00000226004	NP_004081	HIT000031094		4	6	4	5	8	4	13	14	9	3	6	3	4	4	4	5
IPI00018117	P51397	Q6FGC3	ENSP00000230895	NP_004385	HIT000031132		1	0	1	0	0	0	0	0	0	0	0	0	0	0	0	0
IPI00216171	P09104	Q6FHV6	ENSP00000229277	NP_001966	HIT000031150		247	198	186	150	245	257	280	304	206	208	222	160	144	140	167	138
IPI00002149	Q9Y6B6	Q53F37	ENSP00000282606	NP_001028675	HIT000031235		0	0	0	0	0	0	0	0	0	0	1	0	0	0	0	1
IPI00032904	Q16143	Q6IAX7	ENSP00000308057	NP_001001502	HIT000031277		21	20	27	19	6	11	17	17	25	28	22	16	13	17	10	7
IPI00006663	P05091	Q53FB6	ENSP00000261733	NP_000681	HIT000031323		16	4	10	6	14	11	15	20	38	25	45	43	13	14	14	15
IPI00013315	Q99619		ENSP00000229274	NP_116030	HIT000031334		0	0	0	1	0	0	0	0	0	0	0	0	0	0	0	0
IPI00012268	Q13200	Q53XQ4	ENSP00000310129	NP_002799	HIT000031345		6	3	4	3	5	4	6	3	4	3	7	3	0	1	5	2
IPI00019912	P51659	Q59H27	ENSP00000256216	NP_000405	HIT000031426		1	0	1	1	4	5	0	1	5	9	4	3	0	2	0	1
IPI00007812	P21281	Q59HF3	ENSP00000276390	NP_001684	HIT000031428		115	83	88	68	105	117	98	86	126	126	161	133	67	59	66	58
IPI00015361	Q99471		ENSP00000334188	NP_002615	HIT000031525		2	1	3	3	4	7	3	2	2	4	6	5	3	0	2	1
IPI00006176	O14964		ENSP00000331201	NP_004703	HIT000031603		3	2	3	0	1	2	0	2	2	0	5	3	0	0	0	2
IPI00219575	Q13867		ENSP00000261714	NP_000377	HIT000031645		0	0	0	0	1	0	0	0	0	0	0	0	0	2	0	0
IPI00293857	P49407			NP_004032	HIT000031661		2	1	7	2	2	3	2	2	4	2	2	5	1	2	1	2
IPI00024580	Q96RQ3	Q68D27	ENSP00000265594	NP_064551	HIT000031766		5	0	2	2	2	2	0	1	2	3	2	1	2	0	0	1
IPI00028541	Q14094	Q53GK0	ENSP00000237654	NP_006826	HIT000032125		0	0	0	0	0	0	0	0	0	0	1	0	0	0	0	0
IPI00019903	Q9BSH4	Q8N9Q7	ENSP00000258975	NP_057444	HIT000032183		0	0	0	1	1	1	1	0	4	2	2	1	0	0	0	0
IPI00220416	P14927	Q6FGD1	ENSP00000287022	NP_006285	HIT000032304		9	8	11	6	18	16	19	12	13	15	12	17	13	14	9	9
IPI00012855	P17152	Q53YB2	ENSP00000319992	NP_003867	HIT000032335		4	4	5	5	4	4	4	3	2	0	0	0	0	0	1	1
IPI00008529	P05387	Q6FG96	ENSP00000322419	NP_000995	HIT000032403		3	3	5	7	10	11	11	3	10	9	9	15	4	2	3	4
IPI00299155	P25789	Q53XP2	ENSP00000044462	NP_002780	HIT000032410		1	0	5	0	6	6	4	1	1	3	4	3	2	2	2	0
IPI00025341	Q02338		ENSP00000350914	NP_004042	HIT000032475		0	0	0	0	0	0	1	0	3	10	12	6	0	2	0	0
IPI00031622	Q9BRQ6		ENSP00000290913	NP_115719	HIT000032621		2	0	2	0	1	1	2	2	4	2	4	1	0	1	0	0
IPI00291510	P12268	Q6QE17	ENSP00000321584	NP_000875	HIT000032622		2	0	0	0	0	0	0	1	1	0	0	1	0	0	0	0
IPI00640847		Q4LE36	ENSP00000253792	NP_001087	HIT000032659		16	7	12	9	8	10	12	9	8	19	14	12	6	11	9	11
IPI00021785	P10606	Q53YB7	ENSP00000258424	NP_001853	HIT000032686		0	0	0	0	0	0	0	0	9	3	4	3	4	2	5	2
IPI00031655	Q9BRG1		ENSP00000253794	NP_115729	HIT000032724		0	0	0	0	1	1	0	0	1	1	1	0	0	0	0	0
IPI00152156		Q8TB79	ENSP00000302543	NP_057547	HIT000032828		0	0	0	0	0	0	0	0	0	0	0	0	0	1	0	0
IPI00006164		Q9H0C8	ENSP00000254654	NP_110395	HIT000032932		0	0	0	0	0	0	0	1	0	0	0	0	0	0	0	0
IPI00021369	P02511	Q0JUA6	ENSP00000227251	NP_001876	HIT000032981		10	5	9	3	2	3	6	5	3	6	56	35	163	155	299	243
IPI00239077	P49773		ENSP00000304229	NP_005331	HIT000033040		18	19	23	11	18	18	6	6	27	15	15	8	5	3	6	5
IPI00003419		O00193	ENSP00000228136	NP_055082	HIT000033051		0	0	0	0	0	0	0	0	0	0	0	0	0	0	0	1
IPI00328748	P55145	Q14CX4	ENSP00000273628	NP_006001	HIT000033117		0	0	0	0	1	0	0	0	0	0	0	0	0	0	0	0
IPI00029558	O95298	Q549M5	ENSP00000281031	NP_004540	HIT000033146		1	0	0	1	1	0	0	0	1	2	1	0	0	1	0	0
IPI00006662	P05090	Q6IBG6	ENSP00000345179	NP_001638	HIT000033192		1	0	1	0	0	0	0	1	3	1	17	10	14	13	19	18
IPI00015161	O43924	Q6IB24	ENSP00000287600	NP_002592	HIT000033477		1	0	0	0	1	0	0	0	0	0	0	2	0	1	0	0
IPI00642971		Q71RH4	ENSP00000338323	NP_115754	HIT000033486		5	1	3	0	2	3	2	0	6	3	3	4	2	4	3	1
IPI00152981	Q9H845	Q59FN3	ENSP00000312618	NP_054768	HIT000033562		0	0	1	0	0	0	0	0	3	0	5	4	0	2	0	0
IPI00026174	P06307	Q6FG82	ENSP00000335657	NP_000720	HIT000033696		0	0	0	1	0	0	1	2	1	2	1	1	1	0	0	0
IPI00022891	P12235		ENSP00000281456	NP_001142	HIT000033884		14	15	13	8	13	13	4	7	15	21	20	20	7	8	5	5
IPI00018398	P17980	Q3B757	ENSP00000298852	NP_002795	HIT000033914		2	0	0	0	0	0	2	3	4	6	5	0	1	1	1	0
IPI00554777	P08243		ENSP00000175506	NP_001664	HIT000033923		0	0	1	0	0	0	0	0	1	0	0	0	0	0	0	0
IPI00300725	P02538	Q2TAZ9	ENSP00000369317	NP_005545	HIT000033986		0	0	0	0	0	0	0	0	0	0	0	0	1	3	0	0
IPI00646304	P23284	Q6IBH5	ENSP00000300026	NP_000933	HIT000034019		6	5	6	6	8	15	6	9	7	2	11	6	4	7	5	3
IPI00215920	P62330	Q5U025	ENSP00000298316	NP_001654	HIT000034078		0	0	0	0	1	0	0	0	1	2	2	0	0	0	0	0
IPI00554660	Q9P0Z9	Q6IAJ9	ENSP00000317721	NP_057602	HIT000034109		0	0	0	0	0	0	0	1	0	0	0	0	0	0	0	0
IPI00399089	Q14696		ENSP00000261758	NP_055969	HIT000034205		0	0	0	0	1	1	1	0	2	1	0	1	0	0	0	0
IPI00171844	Q9BT78	Q53FV3	ENSP00000264389	NP_057213	HIT000034261		1	0	5	0	2	3	2	1	9	7	8	2	2	0	0	2
IPI00002245		Q8NC66	ENSP00000261206	NP_078836	HIT000034277		0	0	0	0	0	0	0	0	0	0	2	0	0	0	0	0
IPI00305518	Q96GE4		ENSP00000269064	NP_612372	HIT000034421		0	0	0	0	0	1	0	0	0	0	0	0	0	0	0	0
IPI00006979	Q9HD34		ENSP00000332502	NP_065141	HIT000034432		0	0	0	0	0	0	0	0	1	0	0	0	0	0	0	0
IPI00062419		Q96GA7	ENSP00000341117	NP_612441	HIT000034615		0	0	0	0	2	2	0	2	0	0	0	0	0	0	0	0
IPI00740001					HIT000034625		0	0	0	0	0	0	0	0	0	0	0	0	1	0	0	0
IPI00029469	P42025	Q13841	ENSP00000289228	NP_005726	HIT000034792		1	0	3	3	3	5	1	5	2	3	3	1	2	1	1	1
IPI00217223	P22234	Q68CQ5	ENSP00000264221	NP_006443	HIT000034875		0	0	0	0	0	0	0	0	5	3	8	6	0	4	5	2
IPI00019326	P10109		ENSP00000260270	NP_004100	HIT000034881		0	0	0	0	0	0	0	0	0	0	1	1	0	0	0	0
IPI00062037	Q96FJ2		ENSP00000240343	NP_542408	HIT000035065		8	7	8	2	8	10	12	10	9	11	13	6	15	10	10	5
IPI00153011	Q9C040		ENSP00000339659	NP_056086	HIT000035183		5	2	7	2	12	8	6	10	14	12	16	11	11	7	8	3
IPI00219430	O75448		ENSP00000348610	NP_055630	HIT000035228		0	1	0	0	0	0	0	0	0	0	0	0	0	0	0	0
IPI00018260	Q9NVT9		ENSP00000276569	NP_060590	HIT000035326		0	0	0	0	0	0	0	0	0	0	0	0	0	0	0	1
IPI00299402	P11498		ENSP00000347900	NP_000911	HIT000035332		14	11	5	8	3	3	5	1	7	6	7	9	2	5	2	3
IPI00029665	Q96EY8		ENSP00000266839	NP_443077	HIT000035478		1	0	1	0	0	2	1	0	1	0	1	0	2	2	0	1
IPI00008167	P54709		ENSP00000286371	NP_001670	HIT000035482		2	0	1	0	1	0	0	2	2	0	1	3	0	0	0	0
IPI00032875	Q16134	Q547S8	ENSP00000303552	NP_004444	HIT000035519		1	0	0	1	0	2	0	0	5	5	6	2	0	0	0	0
IPI00002520	P34897	Q53ET4	ENSP00000333667	NP_005403	HIT000035537		2	1	1	0	0	1	0	0	2	1	0	0	0	0	0	0
IPI00748145	P04899	Q96C71	ENSP00000312999	NP_002061	HIT000035686		13	3	12	2	15	16	17	17	21	27	29	21	17	16	26	23
IPI00374223	Q96EL1		ENSP00000329735	NP_976248	HIT000035709		0	1	0	0	0	0	0	0	0	0	0	0	0	0	0	0
IPI00029079	P49915	Q53F90	ENSP00000295920	NP_003866	HIT000035715		0	0	0	0	0	0	0	0	3	3	2	1	1	0	0	0
IPI00016346	O94903		ENSP00000333551	NP_009129	HIT000035763		8	2	1	0	2	4	0	0	1	3	6	0	0	1	1	1
IPI00018364	P61225	Q5JQ44	ENSP00000319096	NP_002877	HIT000035781		4	3	1	0	4	7	4	1	5	2	6	2	1	0	0	0
IPI00018840	Q15650		ENSP00000261884	NP_057297	HIT000035819		0	0	0	0	0	0	0	0	1	0	0	0	0	0	0	0
IPI00290416	Q9NTK5	Q0JT32	ENSP00000284719	NP_037473	HIT000035990		19	18	14	15	27	21	23	15	10	13	12	12	9	12	24	10
IPI00028004	P49720	Q0P6J7	ENSP00000225426	NP_002786	HIT000036078		1	0	0	0	2	1	1	0	3	2	2	1	0	0	0	1
IPI00014253	Q15050		ENSP00000322396	NP_055984	HIT000036098		0	0	0	1	0	0	0	0	0	0	0	0	0	0	0	0
IPI00012512	P62070		ENSP00000256196	NP_036382	HIT000036123		0	0	0	0	2	0	0	0	1	0	0	0	0	0	0	0
IPI00007682	P38606	Q53YD9	ENSP00000273398	NP_001681	HIT000036145		131	116	105	64	128	132	141	141	131	141	156	140	73	64	70	70
IPI00027794	Q9H3H3		ENSP00000307933	NP_113638	HIT000036170		1	0	0	1	1	2	1	0	0	0	0	0	0	0	0	0
IPI00290452	Q969X1	Q1MW40	ENSP00000258412	NP_071435	HIT000036269		0	0	0	0	0	0	0	0	0	0	0	0	1	2	2	1
IPI00026053	O75508		ENSP00000064724	NP_005593	HIT000036285		17	19	12	11	20	25	30	29	15	17	27	21	55	58	83	88
IPI00018195	P27361	Q7Z3H5	ENSP00000263025	NP_002737	HIT000036452		0	0	2	0	0	0	3	4	3	1	1	1	3	2	3	0
IPI00027255	P14649		ENSP00000207437	NP_002466	HIT000036675		1	0	3	2	3	0	2	0	0	1	0	0	0	0	0	0
IPI00156689	Q99536	Q5BKZ7	ENSP00000347872	NP_006364	HIT000036978		3	5	6	9	2	9	10	11	5	3	4	9	14	12	20	22
IPI00219217	P07195	Q5U077	ENSP00000229319	NP_002291	HIT000037014		101	85	62	35	91	97	75	70	106	130	107	103	81	75	82	90
IPI00027448	O75964	Q0JSX4	ENSP00000300688	NP_006467	HIT000037017		5	8	5	3	5	7	9	6	10	9	3	4	3	3	2	3
IPI00029114	Q14197		ENSP00000301585	NP_001536	HIT000037083		1	0	0	0	2	2	0	0	0	0	2	0	0	0	0	0
IPI00003566	Q86YM7	Q53F18	ENSP00000334382	NP_004263	HIT000037145		10	4	6	3	8	11	9	5	11	16	12	9	2	2	0	2
IPI00009890	P07093	Q53S15	ENSP00000258405	NP_006207	HIT000037247		0	0	0	0	2	2	0	0	1	2	1	3	0	0	0	0
IPI00303434		Q8N2D5	ENSP00000288400	NP_443086	HIT000037319		0	0	0	0	0	0	0	0	0	0	0	0	1	0	0	0
IPI00300096	Q15286		ENSP00000229340	NP_006852	HIT000037406		2	0	5	0	3	4	1	0	4	10	4	4	4	0	6	4
IPI00008524	P11940		ENSP00000313007	NP_002559	HIT000037423		8	3	3	5	11	10	8	9	2	1	5	1	3	0	2	0
IPI00298558	Q9BUL8		ENSP00000338141	NP_009148	HIT000037551		3	1	2	2	2	2	1	2	2	0	0	0	0	0	0	0
IPI00003865	P11142	Q53GZ6	ENSP00000227378	NP_006588	HIT000037619		99	82	94	78	133	131	113	116	117	108	144	126	79	85	73	75
IPI00026156	P14317	Q53Y93	ENSP00000320176	NP_005326	HIT000037673		0	0	0	0	0	0	0	0	0	0	0	1	0	2	0	0
IPI00221226	P08133		ENSP00000346550	NP_001146	HIT000037805		4	2	6	0	4	2	3	3	8	9	9	10	2	4	5	2
IPI00306265	O43572		ENSP00000225737	NP_009133	HIT000037812		0	0	0	0	1	0	0	0	0	0	0	2	0	0	0	0
IPI00093057	P36551	Q53F08	ENSP00000264193	NP_000088	HIT000037878		0	0	0	0	0	0	0	1	1	0	1	0	0	0	0	0
IPI00017469	P35270	Q53GI9	ENSP00000234454	NP_003115	HIT000037938		5	3	3	2	4	4	4	4	2	3	5	2	2	0	2	2
IPI00220409	Q9Y478		ENSP00000229328	NP_006244	HIT000038073		1	0	0	0	0	0	0	0	0	0	0	0	0	0	0	0
IPI00295832	P23515	Q53HB8	ENSP00000247271	NP_002535	HIT000038239		8	4	5	3	6	7	7	9	5	5	1	1	25	20	19	24
IPI00004397	P11234	Q53T32	ENSP00000272519	NP_002872	HIT000038302		0	0	0	0	0	1	0	0	0	0	0	0	1	0	0	0
IPI00004367	Q9H0Q3	Q0JU18	ENSP00000260282	NP_071286	HIT000038387		8	9	8	6	12	10	11	14	12	12	16	15	5	8	6	6
IPI00011913	Q13151	Q6IB18	ENSP00000316042	NP_006796	HIT000038484		1	1	0	0	0	1	0	1	1	2	4	1	0	0	0	0
IPI00003004	Q9H936		ENSP00000322020	NP_078974	HIT000038512		33	25	26	26	31	36	17	15	32	44	39	33	9	9	8	8
IPI00171421		Q8NBN2	ENSP00000338607	NP_057731	HIT000038554		1	0	1	0	0	1	1	1	0	0	0	0	0	0	0	0
IPI00246058	Q8WUM4	Q4W4Y1	ENSP00000307387	NP_037506	HIT000038729		7	0	7	3	8	7	8	8	16	12	13	3	5	7	8	1
IPI00001541	Q9Y5J7		ENSP00000216463	NP_036592	HIT000038755		0	0	0	0	2	0	2	2	2	0	3	0	1	0	0	0
IPI00305316	P52747	Q9H176	ENSP00000299606	NP_003433	HIT000038760		0	0	0	0	0	0	1	0	0	0	0	0	0	0	0	0
IPI00166956	Q5QJ74	Q0VAN5	ENSP00000284259	NP_689928	HIT000038792		0	0	0	0	0	0	0	0	0	0	0	0	1	0	0	0
IPI00005087	Q9NYL9	Q5HYL6	ENSP00000308753	NP_055362	HIT000038810		0	0	0	0	0	0	0	0	0	0	0	0	0	1	0	0
IPI00032561	Q9Y376	Q53RN7	ENSP00000258418	NP_057373	HIT000038831		1	2	3	2	5	6	6	6	11	13	3	3	2	1	2	0
IPI00014316	Q15078	Q5U0G3	ENSP00000318486	NP_003876	HIT000038835		0	0	0	0	0	0	0	0	1	0	0	0	0	0	0	0
IPI00549789		Q8TCN8	ENSP00000340693	NP_060779	HIT000039043		0	0	0	0	0	0	0	0	1	0	0	0	0	0	0	0
IPI00018009	Q96F86		ENSP00000320503	NP_079359	HIT000039181		0	0	1	0	0	1	0	0	0	0	0	0	0	0	0	0
IPI00017303	P43246	Q0ZAI9	ENSP00000233146	NP_000242	HIT000039221		0	0	0	0	0	0	0	0	0	0	0	0	0	0	1	0
IPI00014149	Q15006	Q0P6I4	ENSP00000220853	NP_055488	HIT000039235		0	0	0	0	0	0	0	0	1	0	0	0	0	0	0	0
IPI00016768	Q9BYZ2	Q6DUY4	ENSP00000302393	NP_149972	HIT000039365		0	0	0	0	1	0	0	0	0	0	0	0	0	0	0	0
IPI00043520		Q96MY3			HIT000039405		0	0	0	0	0	0	0	1	0	0	0	0	0	0	0	0
IPI00394781	O14523	Q6DHX1	ENSP00000338885	NP_055622	HIT000039415		3	1	2	2	0	1	3	3	4	2	6	3	0	2	1	1
IPI00739948		Q8TBM9	ENSP00000307803	XP_371501	HIT000039423		0	0	0	0	0	0	0	0	0	0	1	0	0	0	0	0
IPI00016572	P62308	Q49AN9	ENSP00000272348	NP_003087	HIT000039534		0	0	0	0	0	0	0	0	1	0	0	0	0	0	0	0
IPI00018628	Q9H8M1		ENSP00000263960	NP_079423	HIT000039550		0	0	0	0	0	0	0	0	2	2	0	0	0	0	0	0
IPI00019952	P51674	Q86YB0	ENSP00000280187	NP_005268	HIT000039588		24	9	26	12	151	156	40	30	26	33	27	41	8	14	8	17
IPI00047169	Q8TBG9	Q0JU38	ENSP00000295894	NP_653243	HIT000039597		2	2	2	1	2	2	2	2	2	2	2	2	0	0	0	0
IPI00290755		Q8TBF8	ENSP00000288228	NP_689663	HIT000039613		0	0	0	0	0	0	1	1	0	0	0	0	0	0	0	0
IPI00427501	Q8N2G8		ENSP00000301671	NP_115873	HIT000039636		0	0	0	0	0	0	0	0	1	0	0	0	0	0	0	0
IPI00298980	P11229	Q53XZ3	ENSP00000306490	NP_000729	HIT000039688		0	0	0	0	0	0	2	0	0	0	0	0	0	0	0	0
IPI00021685	Q9H0F7	Q0JTD0	ENSP00000337722	NP_115522	HIT000039785		0	0	0	0	0	0	0	0	0	0	0	1	0	0	0	0
IPI00023728	Q92820		ENSP00000260118	NP_003869	HIT000039846		0	0	0	0	1	1	0	0	2	4	1	0	0	0	0	0
IPI00031023	Q13045		ENSP00000324573	NP_002009	HIT000039889		0	0	1	0	1	1	0	0	0	0	1	1	0	0	0	0
IPI00016608	Q15363	Q6FHT8	ENSP00000262225	NP_006806	HIT000040040		1	0	0	0	0	0	0	0	5	1	1	0	0	0	0	0
IPI00014213	Q15031	Q9BQR0	ENSP00000265537	NP_056155	HIT000040054		0	0	0	0	0	0	0	0	0	0	0	0	0	0	2	0
IPI00015476	P43007	Q53F03	ENSP00000234256	NP_003029	HIT000040146		10	6	6	2	14	11	9	8	4	2	4	3	2	4	1	2
IPI00550852	Q9UJW0	Q9NSJ5	ENSP00000255263	NP_057305	HIT000040195		2	0	2	0	0	0	0	0	0	2	2	4	0	0	0	0
IPI00289120	Q9BZJ7	Q5KU27	ENSP00000319250	NP_543141	HIT000040218		0	0	0	0	0	0	0	0	0	0	0	0	0	1	1	0
IPI00167144		Q8N6Z3	ENSP00000328087		HIT000040306		0	0	0	0	0	0	0	0	0	0	0	1	0	0	0	0
IPI00152316		Q8IYA3	ENSP00000288912	NP_653269	HIT000040562		0	0	0	0	0	0	0	0	0	2	0	0	0	0	0	0
IPI00166479	Q8N336		ENSP00000265840	NP_061182	HIT000040628		0	0	0	0	1	1	0	0	0	0	0	0	0	0	0	0
IPI00181706			ENSP00000308857	XP_934560	HIT000040642		0	0	0	0	0	0	0	0	3	3	2	0	0	0	0	0
IPI00010796	P07237	Q96C96	ENSP00000327801	NP_000909	HIT000040847		4	1	5	2	11	10	3	7	13	9	12	10	1	0	1	0
IPI00297322		Q3LIF2	ENSP00000327309	NP_115765	HIT000040964		1	0	0	1	1	1	0	0	1	0	0	1	0	0	0	0
IPI00003927	Q08752	Q6FGM6	ENSP00000303754	NP_005029	HIT000041115		0	0	0	0	0	0	0	0	1	0	1	0	0	0	0	0
IPI00021298	P35900		ENSP00000167588	NP_061883	HIT000041311		0	0	0	0	0	0	0	0	0	0	0	0	0	0	2	0
IPI00005592	Q01064	O15307	ENSP00000243052	NP_000915	HIT000041453		0	0	1	0	0	2	0	0	1	2	1	1	1	2	0	0
IPI00376966		Q6PIM6	ENSP00000342997		HIT000041461		0	0	0	0	0	0	0	1	0	0	0	0	0	0	0	0
IPI00166861		Q8N5I9	ENSP00000280749	NP_689531	HIT000041492		0	0	0	0	0	0	0	0	1	0	0	0	0	0	0	0
IPI00000828	P01210	Q3B7B1	ENSP00000324248	NP_006202	HIT000041575		0	0	0	0	0	1	0	0	0	0	0	0	0	0	0	0
IPI00000130	P61278		ENSP00000287641	NP_001039	HIT000041637		0	0	0	0	0	0	2	0	0	0	0	0	0	0	0	0
IPI00376955	Q00537		ENSP00000261211	NP_002586	HIT000041757		0	0	0	0	0	0	0	0	0	1	0	0	0	0	0	0
IPI00166746	Q8N511	Q53EQ5	ENSP00000292114	NP_689677	HIT000041808		0	0	0	0	0	0	0	0	0	0	0	0	0	0	1	0
IPI00019006	O60603		ENSP00000260010	NP_003255	HIT000041939		0	0	0	0	0	0	0	0	0	1	0	0	0	0	0	0
IPI00005129	O15126	Q6FG23	ENSP00000342940	NP_004857	HIT000042061		2	2	3	3	2	2	2	1	5	5	3	3	1	1	1	0
IPI00016701	Q15391		ENSP00000308361	NP_055694	HIT000042139		0	0	1	0	0	0	0	0	0	0	0	0	0	0	0	0
IPI00003519	Q15029	Q6IBM8	ENSP00000262414	NP_004238	HIT000042172		2	0	0	0	0	1	0	0	0	0	0	0	0	0	0	0
IPI00032342	Q14669	Q14CA3	ENSP00000373696	NP_004229	HIT000042196		0	0	0	1	0	0	0	0	0	0	0	1	0	0	1	1
IPI00000897	P42694	Q504Q7	ENSP00000351524	NP_055692	HIT000042203		0	0	0	0	0	0	0	0	0	0	0	0	0	0	1	0
IPI00030915	P40818	Q2TB31	ENSP00000302239	NP_005145	HIT000042205		0	0	0	0	0	0	1	0	0	0	1	0	0	0	0	0
IPI00009305	P46926		ENSP00000311876	NP_005462	HIT000042214		4	2	4	2	2	4	3	2	4	7	4	5	1	1	2	0
IPI00032959		Q14702	ENSP00000282541	NP_055956	HIT000042244		0	0	0	0	0	0	0	0	3	2	2	2	0	2	0	1
IPI00022239	P53582	Q5CZ91	ENSP00000296411	NP_055958	HIT000042248		0	0	0	0	1	0	0	0	0	0	0	0	0	0	0	0
IPI00470711	Q14156	Q2VPK2	ENSP00000254624	NP_055952	HIT000042280		0	0	0	0	0	0	0	0	1	1	1	0	0	0	0	0
IPI00029046	Q14165		ENSP00000228506	NP_055545	HIT000042289		0	0	0	0	0	0	0	0	0	0	0	0	0	1	1	0
IPI00014177	Q15019	Q53QU3	ENSP00000353157	NP_001008491	HIT000042294		19	11	9	7	14	17	15	23	11	20	25	21	29	26	32	27
IPI00299526	Q15022		ENSP00000316578	NP_056170	HIT000042297		0	0	0	0	0	0	0	0	0	0	0	0	0	0	0	1
IPI00005635	Q14679		ENSP00000258398	NP_055455	HIT000042310		0	0	0	0	0	0	0	0	0	0	0	0	0	0	0	1
IPI00032388	Q14693	Q53T25	ENSP00000256720	NP_663731	HIT000042325		0	0	0	0	0	0	1	0	0	0	0	0	0	0	0	0
IPI00001159	Q92616		ENSP00000300648	NP_006827	HIT000042355		0	0	0	0	0	0	0	0	0	0	0	0	0	0	1	0
IPI00293921	Q92547		ENSP00000260810	NP_008958	HIT000042392		0	0	0	0	0	1	0	0	0	0	0	0	0	0	0	0
IPI00152183		Q8TBB6	ENSP00000231706	NP_066000	HIT000042528		0	0	1	0	0	0	0	0	0	0	0	0	0	0	0	0
IPI00783278		Q53EN3			HIT000042815		3	3	2	0	4	1	1	1	2	1	4	4	2	0	0	2
IPI00216308	P21796		ENSP00000265333	NP_003365	HIT000042826		67	47	41	24	119	121	70	78	77	50	81	65	12	16	19	12
IPI00743690					HIT000042879		0	0	0	0	0	1	0	0	1	0	0	0	0	0	0	0
IPI00032343		Q6P6A7	ENSP00000326044		HIT000042893		0	1	0	0	0	1	0	0	0	0	0	0	0	0	0	0
IPI00446753		Q6ZWF6	ENSP00000367255	XP_001127666	HIT000043043		0	0	0	0	0	0	0	0	0	0	0	0	0	0	1	0
IPI00410079		Q96H23	ENSP00000342493	NP_060615	HIT000043065		0	0	0	0	0	0	0	0	0	0	5	1	0	1	0	0
IPI00743074					HIT000043120		0	0	1	0	0	0	0	0	0	0	0	0	0	0	0	0
IPI00420071		Q6P3T0	ENSP00000307093	NP_149052	HIT000043213		31	21	47	18	38	38	36	54	40	45	49	40	31	40	18	19
IPI00446682		Q6ZWB4		XP_001133680	HIT000043222		0	0	2	0	0	0	1	0	0	0	0	0	0	0	0	0
IPI00446355		Q6ZW12	ENSP00000361568		HIT000043670		0	0	0	0	0	0	0	0	0	1	0	0	0	0	0	0
IPI00446327		Q6ZW02	ENSP00000364323		HIT000043721		1	0	0	0	0	0	0	0	0	0	0	0	0	0	0	0
IPI00746087					HIT000043905		0	0	0	1	0	0	0	0	0	0	0	0	0	0	0	0
IPI00401826		Q6ZVQ3	ENSP00000339949		HIT000044087		0	0	0	0	0	0	0	0	0	0	0	0	1	0	0	0
IPI00446328		Q6ZVQ2			HIT000044089		0	0	0	0	0	0	0	0	0	1	0	0	0	0	0	0
IPI00446290		Q6ZVM5	ENSP00000365028		HIT000044213		0	0	0	0	0	0	0	1	0	0	0	0	0	0	0	0
IPI00216989	Q6ZVF9		ENSP00000328672	NP_938022	HIT000044489		1	0	0	0	0	0	0	0	0	0	0	0	0	0	0	0
IPI00401939		Q684P4	ENSP00000254695	NP_055900	HIT000044513		2	1	1	0	0	0	0	0	0	1	0	0	2	1	0	0
IPI00419253		Q29SS9	ENSP00000343165		HIT000044532		1	0	0	0	0	0	0	0	0	0	0	0	0	0	0	0
IPI00376788		Q6U9Y3	ENSP00000300179	NP_775835	HIT000044646		1	0	0	0	0	0	0	0	0	0	0	0	1	0	0	0
IPI00024166	O14807	Q6FGP0	ENSP00000289104	NP_036351	HIT000044827		1	0	1	0	0	2	0	0	2	2	2	2	1	1	0	0
IPI00217511		Q8IXE5	ENSP00000330010		HIT000044966		1	0	0	0	0	0	0	0	1	0	0	0	0	0	0	0
IPI00743040					HIT000045135		0	1	0	0	0	0	0	0	0	0	0	0	0	0	0	0
IPI00103563	Q8WXK1	Q3ZCP3	ENSP00000275699	NP_563616	HIT000045233		0	0	0	0	0	0	1	0	0	0	0	0	0	0	0	0
IPI00783623		Q6ZUS2	ENSP00000342528	XP_001128362	HIT000045236		0	0	0	0	0	0	0	0	0	0	0	0	0	0	0	1
IPI00385217			ENSP00000322206	XP_044166	HIT000045355		0	0	0	0	0	0	0	0	0	1	0	0	0	0	0	0
IPI00646634	Q14138				HIT000045500		0	0	0	0	0	0	0	0	0	0	0	0	1	0	0	0
IPI00401125		Q6ZUF6	ENSP00000348819	NP_997380	HIT000045613		0	0	0	0	0	0	1	0	0	0	0	0	0	0	0	0
IPI00445572		Q6ZUE9	ENSP00000365079		HIT000045629		0	0	0	0	0	0	0	0	0	0	0	0	0	0	1	0
IPI00445496		Q6ZUA8	ENSP00000357567	XP_932559	HIT000045722		0	0	0	0	0	0	0	0	1	0	0	0	0	0	0	0
IPI00304761		O94830	ENSP00000315208	NP_056029	HIT000045777		1	1	0	1	2	2	1	2	0	0	1	0	0	0	0	0
IPI00008157		Q6ZU35	ENSP00000264229		HIT000045887		0	0	0	0	1	0	0	0	0	0	0	0	0	0	0	0
IPI00414629			ENSP00000344942	XP_935129	HIT000046240		0	0	0	1	0	0	0	0	0	0	0	0	0	0	0	0
IPI00553067		Q5JPD9	ENSP00000307666	NP_060137	HIT000046351		3	0	1	0	6	4	4	3	4	4	11	4	3	1	0	0
IPI00445111		Q6ZTI5	ENSP00000371284		HIT000046452		0	0	0	0	0	0	0	0	0	0	0	0	0	0	0	1
IPI00410496	Q56UQ5		ENSP00000324208	NP_997305	HIT000046471		0	0	0	0	0	0	0	0	0	0	0	0	1	0	0	0
IPI00444983		Q6ZTC8	ENSP00000372009		HIT000046610		0	0	0	0	0	0	1	0	0	0	0	0	0	0	0	0
IPI00743555		Q6ZT74	ENSP00000344362		HIT000046719		0	0	0	0	1	0	0	0	0	0	0	0	0	0	0	0
IPI00168084	Q8NB14	Q3ZCV1	ENSP00000303434	NP_115946	HIT000046816		0	0	0	0	0	0	0	0	0	0	0	0	1	0	0	0
IPI00061273		Q6ZSU0	ENSP00000299732	NP_612460	HIT000047025		0	0	0	0	0	1	0	1	0	1	0	0	0	0	0	0
IPI00328555		Q6ZSS7	ENSP00000281416	NP_060164	HIT000047049		2	1	2	1	1	1	0	1	2	0	0	0	0	0	0	0
IPI00394812		Q1L5Z9	ENSP00000306916	NP_940863	HIT000047079		0	0	0	0	0	1	1	0	0	0	0	0	0	0	0	0
IPI00399252		Q6IE81	ENSP00000226319	NP_955352	HIT000047199		0	0	0	0	0	1	0	0	0	0	0	0	0	0	0	0
IPI00444479		Q6ZSH6			HIT000047301		0	0	0	1	1	0	0	0	0	0	0	0	1	0	0	0
IPI00006660		Q15111	ENSP00000341052	NP_006217	HIT000047387		0	0	0	0	0	0	0	0	0	0	0	1	1	0	2	1
IPI00003363	Q9UD71	Q547V9	ENSP00000254079	NP_115568	HIT000047415		0	0	6	0	5	4	4	1	2	0	1	3	3	4	2	0
IPI00401934		Q6ZS49	ENSP00000368961	NP_001001684	HIT000047604		0	0	0	0	0	0	0	0	1	0	0	0	0	0	0	0
IPI00745743					HIT000047656		0	0	0	0	1	0	0	0	0	0	0	0	0	0	0	0
IPI00217490		Q53EP0	ENSP00000338523	NP_073600	HIT000047699		0	0	0	0	1	0	0	0	0	0	0	0	0	0	0	0
IPI00418823		Q6ZRV1			HIT000047834		0	1	0	0	0	0	0	1	1	3	1	2	0	0	0	0
IPI00293362		Q5JPA8	ENSP00000265836	NP_059985	HIT000047935		0	0	0	0	0	0	0	1	0	0	0	0	0	0	0	0
IPI00443889		Q6ZRH3	ENSP00000358225		HIT000048100		0	0	0	0	0	0	0	0	0	0	0	0	0	0	1	0
IPI00418754		Q6ZRG1	ENSP00000343398	NP_001034859	HIT000048115		0	0	0	0	0	0	0	0	0	0	1	0	0	0	0	0
IPI00443573		Q6ZR56		XP_001130369	HIT000048362		0	0	0	0	0	1	0	0	0	0	0	0	0	0	0	0
IPI00293336		Q68D91	ENSP00000314776	NP_981951	HIT000048476		1	0	1	0	2	2	0	0	4	1	3	2	0	0	2	0
IPI00418736		Q6ZQY2	ENSP00000341179	NP_001013697	HIT000048519		0	0	0	0	0	0	0	0	0	0	0	0	0	0	0	1
IPI00167909		Q32P44	ENSP00000278845	NP_694997	HIT000048552		0	2	0	1	0	0	0	0	1	0	0	0	1	0	1	0
IPI00645934					HIT000048571		1	0	0	0	0	0	0	0	0	0	0	0	0	0	0	0
IPI00443416		Q6ZQQ4		NP_001034886	HIT000048702		0	0	0	0	0	0	0	0	0	0	0	0	1	0	0	0
IPI00399119		Q6ZQQ2	ENSP00000341988	NP_001001670	HIT000048704		0	0	0	0	0	0	0	0	1	0	0	0	0	0	0	0
IPI00216951	P14868	Q53R85	ENSP00000264161	NP_001340	HIT000048792		2	0	0	0	5	3	1	1	1	1	2	0	1	2	2	2
IPI00015842	Q15293	Q5J7V8	ENSP00000054950	NP_002892	HIT000049062		2	0	2	1	5	1	1	1	5	4	9	5	0	1	1	0
[truncated: 1,233 more rows]
