# Supplementary material for: MicroRNA Expression and Regulation in Human, Chimpanzee, and Macaque Brains
Source: PLoS Genet. 2011 Oct 13;7(10):e1002327. doi: 10.1371/journal.pgen.1002327 (PMC3192836; doi:10.1371/journal.pgen.1002327)
Supplement: Table S9 — This table lists PANTHER biological process terms enriched in targets of miRNA with human-specific expression and in targets of miRNA with chimpanzee-specific expression. (XLS) [file pgen.1002327.s017.xls]

## Sheet: Sheet1
Table S9. PANTHER biological process terms enriched in targets of miRNAs with human-specific expression and chimpanzee-specific expression
Targets of	Category	Term	P-value*	Genes	Fold Enrichment	Bonferroni P-value	Benjamini P-value
miR with Human-specific expression	PANTHER_BP_ALL	BP00167:Synaptic transmission	8.86363e-05	ENSG00000167535, ENSG00000174469, ENSG00000156113, ENSG00000110076, ENSG00000110436, ENSG00000198216, ENSG00000116266, ENSG00000145451, ENSG00000147439, ENSG00000182771, ENSG00000157152, ENSG00000136874, ENSG00000205726, ENSG00000170743, ENSG00000067191, ENSG00000117016, ENSG00000119283, ENSG00000187391, ENSG00000108797, ENSG00000169891, ENSG00000011677, ENSG00000072071, ENSG00000106089, ENSG0000…	2.29	0.0139	0.0139
	PANTHER_BP_ALL	BP00102:Signal transduction	0.000130939	ENSG00000105245, ENSG00000101665, ENSG00000105976, ENSG00000113448, ENSG00000102908, ENSG00000137727, ENSG00000053254, ENSG00000138032, ENSG00000110076, ENSG00000196821, ENSG00000073711, ENSG00000108509, ENSG00000007402, ENSG00000137166, ENSG00000145451, ENSG00000140285, ENSG00000163083, ENSG00000141646, ENSG00000196914, ENSG00000157654, ENSG00000126458, ENSG00000185033, ENSG00000114353, ENSG0000…	1.31	0.0206	0.0103
	PANTHER_BP_ALL	BP00103:Cell surface receptor mediated signal transduction	0.000154942	ENSG00000135333, ENSG00000105976, ENSG00000101665, ENSG00000169220, ENSG00000162407, ENSG00000053254, ENSG00000137727, ENSG00000196821, ENSG00000137166, ENSG00000118432, ENSG00000065135, ENSG00000140285, ENSG00000163083, ENSG00000141646, ENSG00000185033, ENSG00000114353, ENSG00000170802, ENSG00000004948, ENSG00000168758, ENSG00000134853, ENSG00000141150, ENSG00000143398, ENSG00000064989, ENSG0000…	1.57	0.0243	0.0081
	PANTHER_BP_ALL	BP00166:Neuronal activities	0.00029845	ENSG00000118972, ENSG00000167535, ENSG00000156113, ENSG00000174469, ENSG00000110076, ENSG00000144285, ENSG00000110436, ENSG00000198216, ENSG00000116266, ENSG00000145451, ENSG00000157152, ENSG00000182771, ENSG00000147439, ENSG00000136874, ENSG00000170743, ENSG00000205726, ENSG00000150625, ENSG00000067191, ENSG00000117016, ENSG00000120088, ENSG00000119283, ENSG00000196277, ENSG00000187391, ENSG0000…	1.8	0.0463	0.0117
	PANTHER_BP_ALL	BP00224:Cell proliferation and differentiation	0.000315094	ENSG00000135333, ENSG00000164045, ENSG00000105976, ENSG00000170345, ENSG00000053254, ENSG00000137166, ENSG00000140285, ENSG00000163083, ENSG00000141646, ENSG00000055917, ENSG00000126458, ENSG00000105866, ENSG00000082258, ENSG00000170802, ENSG00000134853, ENSG00000134250, ENSG00000065970, ENSG00000128573, ENSG00000198719, ENSG00000148400, ENSG00000165731, ENSG00000118972, ENSG00000118971, ENSG0000…	1.65	0.0488	0.0099
	PANTHER_BP_ALL	BP00168:Neurotransmitter release	0.00127	ENSG00000169891, ENSG00000167535, ENSG00000156113, ENSG00000072071, ENSG00000198216, ENSG00000067715, ENSG00000116266, ENSG00000147439, ENSG00000136874, ENSG00000205726, ENSG00000170743, ENSG00000067191, ENSG00000117016, ENSG00000119283	2.77	0.1837	0.0332
	PANTHER_BP_ALL	BP00040:mRNA transcription	0.00133	ENSG00000125740, ENSG00000166135, ENSG00000032219, ENSG00000138795, ENSG00000160199, ENSG00000101665, ENSG00000091656, ENSG00000102908, ENSG00000170345, ENSG00000053254, ENSG00000171988, ENSG00000147050, ENSG00000125347, ENSG00000108509, ENSG00000175352, ENSG00000137166, ENSG00000141646, ENSG00000118707, ENSG00000100811, ENSG00000130382, ENSG00000183741, ENSG00000072364, ENSG00000105866, ENSG0000…	1.38	0.1917	0.0299
	PANTHER_BP_ALL	BP00046:Other mRNA transcription	0.00257	ENSG00000108509, ENSG00000124571, ENSG00000171735, ENSG00000149480, ENSG00000143442, ENSG00000143157	5.77	0.3365	0.0499
miR with Chimpanzee-specific expression	PANTHER_BP_ALL	BP00031:Nucleoside, nucleotide and nucleic acid metabolism	1.15591e-05	ENSG00000007372, ENSG00000141448, ENSG00000091656, ENSG00000113448, ENSG00000112183, ENSG00000112182, ENSG00000138735, ENSG00000105997, ENSG00000159556, ENSG00000118267, ENSG00000135316, ENSG00000177732, ENSG00000008441, ENSG00000139154, ENSG00000072121, ENSG00000010818, ENSG00000104447, ENSG00000124788, ENSG00000189007, ENSG00000181722, ENSG00000108753, ENSG00000130522, ENSG00000162374, ENSG0000…	1.89	0.0011	0.001
	PANTHER_BP_ALL	BP00040:mRNA transcription	8.43168e-05	ENSG00000007372, ENSG00000091656, ENSG00000141448, ENSG00000112182, ENSG00000105997, ENSG00000159556, ENSG00000118267, ENSG00000177732, ENSG00000008441, ENSG00000139154, ENSG00000072121, ENSG00000010818, ENSG00000181722, ENSG00000108753, ENSG00000130522, ENSG00000125285, ENSG00000130382, ENSG00000136826, ENSG00000130940, ENSG00000136535, ENSG00000157933, ENSG00000110693, ENSG00000118922, ENSG0000…	2.19	0.0074	0.0037
	PANTHER_BP_ALL	BP00044:mRNA transcription regulation	0.000460698	ENSG00000007372, ENSG00000136826, ENSG00000141448, ENSG00000091656, ENSG00000136535, ENSG00000112182, ENSG00000157933, ENSG00000105997, ENSG00000159556, ENSG00000110693, ENSG00000118922, ENSG00000118267, ENSG00000177732, ENSG00000139154, ENSG00000010818, ENSG00000181722, ENSG00000108753, ENSG00000130522, ENSG00000187079, ENSG00000168779, ENSG00000125285	2.29	0.0401	0.0135
* Calculated using DAVID functional analysis tool (see Materials and Methods). The background for enrichment analysis were all target genes of miRNA expressed in human prefrontal cortex. conserved miRNA target genes were predicted by Targetscan (http://www.targetscan.org//vert_50//vert_50_data_download/Predicted_Targets_Info.txt.zip).
