# Supplementary material for: MicroRNA Expression and Regulation in Human, Chimpanzee, and Macaque Brains
Source: PLoS Genet. 2011 Oct 13;7(10):e1002327. doi: 10.1371/journal.pgen.1002327 (PMC3192836; doi:10.1371/journal.pgen.1002327)
Supplement: Table S13 — This table lists experimentally verified targets of miRNA based on our transfection experiments and the TargetScan predictions. (XLS) [file pgen.1002327.s021.xls]

## Sheet: hsa-miR-299-3p
Target Gene ID	Inhibition effect in SH-SY5Y *	Inhibition effect in SK_N_SH *
ENSG00000010244	-0.241919	-0.416459
ENSG00000138448	0.464382	-0.0285898
ENSG00000160967	-0.0865916	-0.104317
ENSG00000196628	-0.306509	-0.368952
ENSG00000136536	-0.185045	-0.219454
ENSG00000156113	0.0793745	-0.0309832
ENSG00000124201	-0.0338652	-0.311583
ENSG00000105866	-0.352609	-0.25546
ENSG00000186591	0.0839952	-0.00203175
ENSG00000087274	-0.702232	-0.630367
ENSG00000107614	-0.841574	-0.590016
ENSG00000112715	-0.316017	-0.217372
ENSG00000143157	-0.410593	-0.311437
ENSG00000157766	-0.117717	0.218389
ENSG00000161013	-0.786642	-0.770987
ENSG00000103353	-0.560826	-0.49954
ENSG00000152527	-0.117602	-0.0395283
ENSG00000129292	-0.128343	-0.228562
ENSG00000020181	-0.621779	-0.527511
ENSG00000139625	0.0571582	-0.0457402
ENSG00000171723	0.019436	-0.157462
ENSG00000061273	0.067161	-0.120707
ENSG00000108509	-0.0730614	-0.418154
ENSG00000108262	-0.0179684	-0.043499
ENSG00000128266	-0.165739	-0.0670324
ENSG00000165355	-0.485099	-0.534259
ENSG00000111596	-0.377136	-0.400414
ENSG00000071051	-0.257206	-0.149013
ENSG00000099364	-0.495767	-0.262628
* For each gene, inhibition effect (miRNA target effect) is calculated as the log2-transformed expression level difference between cells transfected with miRNA analogue and cells transfected with negative control (mock1) oligonucleotides.

## Sheet: ptr-miR-299-3p
Target Gene ID	Inhibition effect in SH-SY5Y *	Inhibition effect in SK_N_SH *
ENSG00000010244	-0.290194	-0.368429
ENSG00000160967	-0.0720302	-0.0927034
ENSG00000196628	-0.308154	-0.372521
ENSG00000136536	-0.120684	-0.09562
ENSG00000186591	0.26711	-0.117385
ENSG00000087274	-0.6589	-0.565889
ENSG00000156113	0.208336	-0.126038
ENSG00000124201	0.0732169	-0.280761
ENSG00000105866	-0.399542	-0.246998
ENSG00000107614	-1.11641	-0.393494
ENSG00000112715	-0.33662	-0.36871
ENSG00000143157	-0.558435	-0.430395
ENSG00000157766	-0.0682791	0.235456
ENSG00000161013	-0.776621	-0.91712
ENSG00000152527	-0.0983872	0.137123
ENSG00000103353	-0.597307	-0.493059
ENSG00000129292	-0.076536	-0.127644
ENSG00000020181	-0.662758	-0.501789
ENSG00000108509	0.0825924	-0.470387
ENSG00000120913	-0.0405739	0.0546898
ENSG00000171723	-0.0393037	-0.2074
ENSG00000108262	-0.0576078	0.024651
ENSG00000128266	-0.142148	-0.302324
ENSG00000061273	0	-0.123589
ENSG00000165355	-0.35488	-0.45279
ENSG00000111596	-0.329215	-0.44115
ENSG00000071051	-0.266944	-0.125115
ENSG00000099364	-0.394238	-0.154187
* For each gene, inhibition effect (miRNA target effect) is calculated as the log2-transformed expression level difference between cells transfected with miRNA analogue and cells transfected with negative control (mock1) oligonucleotides.

## Sheet: hsa-miR-184
Target Gene ID	Inhibition effect in SH-SY5Y *	Inhibition effect in SK_N_SH *
ENSG00000115109	-0.31839	-0.443818
ENSG00000168066	-0.263277	-0.18117
ENSG00000149577	-0.493389	-0.644941
ENSG00000123908	-0.489466	-0.519467
ENSG00000162407	-0.545977	-0.899626
ENSG00000143756	-0.44185	-0.603562
ENSG00000100354	-0.0426399	-0.126126
ENSG00000171552	0.0731776	-0.0276042
ENSG00000183741	-0.111908	-0.108456
ENSG00000147439	-0.180048	-0.315772
ENSG00000166135	-0.207527	-0.41625
ENSG00000165458	-0.156742	-0.300299
ENSG00000129351	-0.051461	-0.0465293
* For each gene, inhibition effect (miRNA target effect) is calculated as the log2-transformed expression level difference between cells transfected with miRNA analogue and cells transfected with negative control (mock1) oligonucleotides.

## Sheet: hsa-miR-34c-5p
Target Gene ID	Inhibition effect in SH-SY5Y *	Inhibition effect in SK_N_SH *
ENSG00000205213	-0.302233	-0.156618
ENSG00000118707	-0.0540975	-0.0650122
ENSG00000147255	0.275771	-0.232422
ENSG00000119782	-0.228469	-0.125721
ENSG00000132589	-0.173484	-0.102824
ENSG00000067715	-0.533576	-0.571568
ENSG00000151136	-0.387235	-0.285047
ENSG00000164604	-0.0836299	-0.0552932
ENSG00000165152	-0.117803	-0.230174
ENSG00000180263	-0.168431	-0.404298
ENSG00000011677	-0.111864	0
ENSG00000109586	0.0178459	-0.0551756
ENSG00000118985	-0.0562336	-0.335894
ENSG00000103489	-0.0764292	-0.260045
ENSG00000154319	-0.378919	-0.483327
ENSG00000100592	0.0361176	-0.0231518
ENSG00000138604	-0.334028	-0.0878251
ENSG00000197045	-0.283223	-0.512086
ENSG00000116138	-0.279629	-0.387404
ENSG00000108852	0.0281951	-0.190202
ENSG00000100167	-0.190387	-0.0903749
ENSG00000162702	-0.143621	-0.153591
ENSG00000134698	-0.134062	0.238979
ENSG00000161048	-0.0290336	0.0676278
ENSG00000162302	-0.168021	0
ENSG00000211455	-0.20209	-0.1819
ENSG00000175305	-0.0338427	-0.275428
ENSG00000148798	-0.0863727	0.134595
ENSG00000148835	-0.0481177	-0.20209
ENSG00000175352	0.0722892	-0.0926984
ENSG00000049130	-0.0918329	-0.149245
ENSG00000126458	0	-0.483462
ENSG00000104643	-0.393127	-0.265694
ENSG00000166454	-0.185663	-0.17945
ENSG00000134853	-0.391285	-0.503819
ENSG00000139428	-0.303689	-0.144174
ENSG00000162734	-0.402489	-0.356902
ENSG00000151726	-0.0347423	-0.0757639
ENSG00000065802	-0.0984205	0.0790837
ENSG00000114861	-0.0264498	-0.172292
ENSG00000153922	-0.0307471	-0.00552033
ENSG00000153560	-0.0657857	-0.141844
ENSG00000160199	-0.0595805	-0.0736059
ENSG00000171735	-0.0392155	-0.0690935
ENSG00000172292	-0.14638	-0.118606
ENSG00000091844	-0.0524385	-0.0181746
ENSG00000146463	-0.0976614	0.0794833
ENSG00000136874	0.0271747	-0.145167
ENSG00000101384	-0.0295291	-0.125995
ENSG00000168758	-0.182036	-0.00650093
ENSG00000175115	-0.164553	-0.0186854
ENSG00000033867	-0.156292	-0.0900425
ENSG00000102098	-0.0691032	-0.0711994
ENSG00000112242	-0.0528913	-0.019451
ENSG00000182827	-0.0839131	-0.0499214
ENSG00000141258	0.0808497	-0.101919
ENSG00000198060	-0.328633	-0.17702
ENSG00000105810	0.0234695	-0.0330272
ENSG00000122482	-0.0673036	-0.190777
ENSG00000138795	-0.13005	-0.318623
ENSG00000144283	-0.171874	-0.358082
ENSG00000132002	-0.0451136	-0.166868
ENSG00000171843	-0.0119676	-0.196572
ENSG00000033170	0	-0.266271
ENSG00000176624	-0.320829	-0.513792
ENSG00000167535	-0.00538861	-0.00937772
ENSG00000156030	-0.392106	-0.299479
ENSG00000143457	-0.23282	-0.159734
ENSG00000145819	-0.0154174	-0.0428491
ENSG00000198846	-0.0501807	0
ENSG00000182771	0	-0.0109616
ENSG00000011295	-0.246928	-0.252947
ENSG00000079739	-0.0175961	0.072136
ENSG00000168807	-0.382286	-0.492903
ENSG00000143442	0.0183696	-0.133126
ENSG00000171408	0.0288108	-0.0816745
ENSG00000165731	-0.0929632	-0.12292
ENSG00000174469	-0.138695	0.0214903
ENSG00000134369	-0.0654739	-0.179219
ENSG00000084676	-0.0261686	-0.0198482
ENSG00000110880	-0.0056695	-0.135213
ENSG00000124785	-0.296355	-0.22083
ENSG00000157680	0.0656493	-0.182449
ENSG00000066557	-0.300389	-0.313315
ENSG00000150593	-0.259534	0.147536
ENSG00000169032	-0.449493	-0.605384
ENSG00000139636	-0.165478	0.203464
ENSG00000173482	-0.288115	0.085321
ENSG00000159082	-0.0506805	-0.0462132
ENSG00000130382	-0.049017	0.0108506
ENSG00000110025	-0.154897	-0.10249
ENSG00000171033	-0.404423	-0.370861
ENSG00000072042	-0.223123	-0.242663
ENSG00000180398	-0.171848	-0.108226
ENSG00000197879	0.0105734	-0.078842
ENSG00000179820	-0.0308274	0.13692
ENSG00000136828	0.0702582	-0.0715849
ENSG00000053254	-0.0426371	-0.118645
ENSG00000172780	0.0526099	-0.0709815
ENSG00000129422	0.118479	-0.0262465
ENSG00000121766	0.00794035	-0.0489548
ENSG00000170946	0.0531029	-0.101418
ENSG00000151229	-0.188238	0.13449
ENSG00000141646	-0.23225	-0.0659509
ENSG00000173273	-0.0777134	0.0849526
ENSG00000076108	-0.00626527	0
ENSG00000196792	-0.0284666	-0.0112479
ENSG00000175220	-0.0604612	-0.193506
ENSG00000159200	-0.450577	-0.515276
ENSG00000070614	0.0490281	-0.103909
ENSG00000035403	0.0663922	-0.0105043
ENSG00000100811	0.0173456	-0.0550683
ENSG00000167528	-0.121807	-0.0750025
ENSG00000171791	-0.232349	-0.126017
ENSG00000173166	-0.0425757	-0.00363543
ENSG00000149480	0.0573917	-0.0869219
ENSG00000170011	0.188451	-0.0989494
ENSG00000160271	0.0428467	-0.0638452
ENSG00000168264	-0.0706196	-0.136537
ENSG00000198743	0.144791	-0.0477681
ENSG00000138107	-0.0683539	-0.0903453
ENSG00000205726	-0.161447	-0.161483
ENSG00000151474	-0.280925	-0.229742
ENSG00000171988	0.0451205	-0.0255705
ENSG00000032219	-0.0518109	-0.142691
ENSG00000164040	-0.0520131	0.0481909
ENSG00000146592	0.0345187	-0.227263
ENSG00000149091	-0.0324283	-0.236281
ENSG00000165406	-0.137281	-0.314643
ENSG00000149547	0.0243512	-0.0617979
ENSG00000162378	-0.0294741	-0.127566
ENSG00000110092	-0.259215	-0.437066
ENSG00000181915	-0.112777	-0.0654617
ENSG00000129353	-0.125692	-0.0402463
ENSG00000106089	-0.0958357	-0.133866
ENSG00000171992	0.110038	-0.111199
ENSG00000173153	-0.2092	-0.114813
ENSG00000064651	-0.170992	-0.363858
ENSG00000113300	-0.0822824	-0.163614
ENSG00000109084	0.0186675	-0.0377454
ENSG00000170802	-0.29599	-0.307567
ENSG00000119403	-0.111104	-0.0730141
ENSG00000177511	-0.0771855	-0.00550977
ENSG00000153936	0.0712767	-0.0301064
ENSG00000159842	-0.151229	-0.156112
ENSG00000148343	-0.10768	0
ENSG00000137815	-0.0513852	-0.0426647
ENSG00000100731	0.0507535	-0.0381733
ENSG00000184588	-0.177368	-0.0128419
ENSG00000146063	-0.0253026	0.0120555
ENSG00000104969	0.0855616	-0.0146701
ENSG00000116406	-0.145494	-0.0320112
ENSG00000128567	0.163294	-0.0882974
ENSG00000137449	-0.0208399	0.00190118
ENSG00000180008	0.00753431	-0.295589
ENSG00000115806	0.0542159	-0.0439422
ENSG00000102189	0.0385927	-0.0253178
ENSG00000146083	-0.182136	-0.353329
ENSG00000132388	-0.0414329	0.149348
ENSG00000140262	-0.212094	-0.324983
ENSG00000160445	0.028481	-0.0954773
ENSG00000175215	0.169811	-0.0586115
ENSG00000144524	-0.123981	-0.265811
ENSG00000130224	-0.221326	-0.168635
ENSG00000164045	0.160803	-0.065024
ENSG00000103064	-0.301869	-0.208758
ENSG00000117411	-0.0748647	-0.0192765
ENSG00000171451	-0.291631	-0.290088
ENSG00000181852	-0.194281	-0.130025
ENSG00000132463	-0.207542	-0.100677
ENSG00000152465	-0.3205	-0.214164
ENSG00000117016	-0.0612238	0.0637321
ENSG00000129757	-0.251146	-0.168948
ENSG00000164463	-0.099111	0
ENSG00000177674	-0.0617184	0
ENSG00000166833	-0.271638	-0.371642
ENSG00000099204	-0.0175776	0.0183351
ENSG00000143127	0.177368	-0.323259
ENSG00000114353	0.185587	-0.114091
ENSG00000175938	-0.100713	-0.0783503
ENSG00000154118	-0.223309	-0.112251
ENSG00000007402	0.12365	-0.00909892
ENSG00000101346	0.0546307	-0.0655897
* For each gene, inhibition effect (miRNA target effect) is calculated as the log2-transformed expression level difference between cells transfected with miRNA analogue and cells transfected with negative control (mock1) oligonucleotides.

## Sheet: hsa-miR-383
Target Gene ID	Inhibition effect in SH-SY5Y *	Inhibition effect in SK_N_SH *
ENSG00000061676	-0.620398	-0.485028
ENSG00000196792	-0.0562042	-0.139133
ENSG00000091527	-0.2668	-0.48724
ENSG00000053254	-0.116002	-0.128598
ENSG00000117620	-0.358184	-0.457963
ENSG00000101928	-0.444446	-0.418907
ENSG00000123352	0.0112031	-0.0321925
ENSG00000110880	-0.231733	-0.499427
ENSG00000153250	-0.411883	-0.715601
ENSG00000089050	-0.199033	-0.244246
ENSG00000135090	-0.388809	-0.408117
ENSG00000182199	-0.208477	-0.13661
ENSG00000125347	-0.715581	-0.693832
ENSG00000124789	-0.0294328	-0.17033
ENSG00000070269	-0.150996	0.0131056
ENSG00000183513	-0.191705	-0.0773495
ENSG00000116016	-0.259585	-0.174185
ENSG00000196914	-0.295689	-0.192621
ENSG00000168813	-0.273518	-0.281157
ENSG00000075539	-0.0661446	-0.0706127
ENSG00000102317	-0.324806	-0.23629
ENSG00000133083	-0.378921	-0.456168
ENSG00000113391	-0.135148	-0.0919424
ENSG00000185009	-0.0196946	-0.10149
ENSG00000141150	-0.245491	-0.425678
ENSG00000138780	-0.0923328	-0.174706
ENSG00000132334	-0.209224	-0.10278
ENSG00000173575	-0.211705	-0.0320165
ENSG00000122042	-0.526112	-0.355188
ENSG00000185515	-0.219454	0.0583473
ENSG00000117697	-0.235528	-0.141994
ENSG00000146776	0	-0.0461292
ENSG00000140285	-0.247683	0.440062
ENSG00000176887	-0.10031	-0.0657536
ENSG00000168280	-0.384524	-0.151753
ENSG00000118454	0.0911687	-0.110218
ENSG00000102781	-0.288153	-0.132002
ENSG00000102908	-0.0952492	-0.0248503
ENSG00000072134	-0.127806	0.0140722
* For each gene, inhibition effect (miRNA target effect) is calculated as the log2-transformed expression level difference between cells transfected with miRNA analogue and cells transfected with negative control (mock1) oligonucleotides.

## Sheet: hsa-miR-487a
Target Gene ID	Inhibition effect in SH-SY5Y *	Inhibition effect in SK_N_SH *
ENSG00000133401	-0.0956697	0.142193
ENSG00000138032	-0.221422	-0.137682
ENSG00000128512	0.270289	-0.0500181
ENSG00000101974	-0.109552	-0.28646
ENSG00000075223	-0.110599	-0.159201
ENSG00000082258	-0.256739	-0.0223468
ENSG00000132356	-0.30347	-0.292634
ENSG00000113448	0.0927026	-0.0296078
ENSG00000196504	0.0453493	-0.00245639
ENSG00000067560	-0.198428	-0.0493485
ENSG00000187391	-0.0672989	0.169504
ENSG00000198369	0.0261265	-0.0723074
ENSG00000164463	0	-0.203573
ENSG00000157540	-0.146171	0
ENSG00000187079	-0.138369	-0.0619137
ENSG00000087095	-0.169229	-0.0351634
ENSG00000129515	-0.0225184	-0.0437839
ENSG00000125398	0.150091	-0.022674
ENSG00000198252	-0.0424914	-0.125894
ENSG00000196821	-0.0660587	0.0998095
ENSG00000101665	-0.0380469	-0.0908191
ENSG00000109689	-0.223613	-0.268456
ENSG00000083312	-0.0432665	-0.0604824
ENSG00000055917	-0.21697	-0.112577
ENSG00000169220	0.0415681	-0.122446
ENSG00000102081	-0.0837785	-0.0327519
ENSG00000067208	-0.419628	-0.657344
ENSG00000110721	-0.00638297	0.0898099
ENSG00000124164	-0.00725457	-0.0963288
ENSG00000198792	-0.245639	-0.262626
ENSG00000169554	-0.329545	-0.166327
ENSG00000146083	-0.0145004	-0.0449421
ENSG00000137075	-0.488784	-0.286892
ENSG00000065000	-0.0937613	-0.0615051
ENSG00000084234	0.0510194	-0.0240758
ENSG00000160714	-0.0211204	-0.168163
ENSG00000064042	-0.0273858	0.057259
ENSG00000125834	-0.252067	-0.20546
ENSG00000146463	-0.117227	-0.0215732
ENSG00000111605	-0.0536586	0.00994292
ENSG00000072110	-0.00348225	-0.145726
ENSG00000107672	-0.0318655	0.106057
ENSG00000160445	0.00524443	-0.105267
ENSG00000118922	-0.194715	-0.0484121
ENSG00000176624	-0.138341	-0.0735719
ENSG00000102753	-0.0724159	-0.00113671
ENSG00000183496	-0.189687	-0.0636768
ENSG00000106609	-0.0818514	-0.134242
ENSG00000196712	0.00302438	-0.0963457
ENSG00000175893	-0.092073	0.0519014
ENSG00000137992	-0.0815476	-0.0788724
ENSG00000134852	-0.00601095	0.0457595
ENSG00000131389	-0.081526	0.142783
* For each gene, inhibition effect (miRNA target effect) is calculated as the log2-transformed expression level difference between cells transfected with miRNA analogue and cells transfected with negative control (mock1) oligonucleotides.
